# Supplementary material for: Stratification of the risk of developing severe or lethal Covid-19 using a new score from a large Italian population: a population-based cohort study
Source: PubMed Central journal article supplement — BMJ Open. 2021 Nov 18;11(11):e053281. doi: 10.1136/bmjopen-2021-053281 (PMC8602929; doi:10.1136/bmjopen-2021-053281), 2021-11-18
Supplement: bmjopen-2021-053281.draft_revisions.pdf [file bmjopen-2021-053281.draft_revisions.pdf]

# BMJ Open

BMJ Open is committed to open peer review. As part of this commitment we make the peer review history of every article we publish publicly available.

When an article is published we post the peer reviewers' comments and the authors' responses online. We also post the versions of the paper that were used during peer review. These are the versions that the peer review comments apply to.

The versions of the paper that follow are the versions that were submitted during the peer review process. They are not the versions of record or the final published versions. They should not be cited or distributed as the published version of this manuscript.

BMJ Open is an open access journal and the full, final, typeset and author-corrected version of record of the manuscript is available on our site with no access controls, subscription charges or pay-per-view fees (<http://bmjopen.bmj.com>).

If you have any questions on BMJ Open's open peer review process please email [info.bmjopen@bmj.com](mailto:info.bmjopen@bmj.com)

# BMJ Open

## Addressing vaccination priority by stratifying general population according with frailty: the new Covid-19 vulnerability score (CVS)

|                               |                                                                                                                                                                                                                                                                                                                                                                                                                                                                                                                                                                                                                                                                                                                                                                                                                                                                                                                                                                                                                                                                                                                                                                                                                                                                                                                                    |
|-------------------------------|------------------------------------------------------------------------------------------------------------------------------------------------------------------------------------------------------------------------------------------------------------------------------------------------------------------------------------------------------------------------------------------------------------------------------------------------------------------------------------------------------------------------------------------------------------------------------------------------------------------------------------------------------------------------------------------------------------------------------------------------------------------------------------------------------------------------------------------------------------------------------------------------------------------------------------------------------------------------------------------------------------------------------------------------------------------------------------------------------------------------------------------------------------------------------------------------------------------------------------------------------------------------------------------------------------------------------------|
| Journal:                      | <i>BMJ Open</i>                                                                                                                                                                                                                                                                                                                                                                                                                                                                                                                                                                                                                                                                                                                                                                                                                                                                                                                                                                                                                                                                                                                                                                                                                                                                                                                    |
| Manuscript ID                 | bmjopen-2021-053281                                                                                                                                                                                                                                                                                                                                                                                                                                                                                                                                                                                                                                                                                                                                                                                                                                                                                                                                                                                                                                                                                                                                                                                                                                                                                                                |
| Article Type:                 | Original research                                                                                                                                                                                                                                                                                                                                                                                                                                                                                                                                                                                                                                                                                                                                                                                                                                                                                                                                                                                                                                                                                                                                                                                                                                                                                                                  |
| Date Submitted by the Author: | 10-May-2021                                                                                                                                                                                                                                                                                                                                                                                                                                                                                                                                                                                                                                                                                                                                                                                                                                                                                                                                                                                                                                                                                                                                                                                                                                                                                                                        |
| Complete List of Authors:     | Corrao, Giovanni; Università degli Studi di Milano-Bicocca<br>Rea, Federico; University of Milan-Bicocca<br>Carle, Flavia; Polytechnic University of Marche<br>Scodotto, Salvatore; Department of Epidemiologic Observatory, Health Department of Sicily<br>Allotta, Alessandra; Regional Health Authority, Department of Health Services and Epidemiological Observatory<br>Lepore, Vito; Regional Health Agency of Puglia<br>D'Ettorre, Antonio; Regional Health Agency of Puglia<br>Tanzarella, Cinzia; Regional Health Agency of Puglia<br>Vittori, Patrizia; Regional Health Authority<br>Abena, Sabrina; Regional Health Authority<br>Iommi, Marica; Polytechnic University of Marche<br>Spazzafumo, Liana; Regional Health Agency of Marche<br>Ercolanoni, Michele; Regional Welfare Service<br>Blaco, Roberto; Regional Welfare Service<br>Carbone, Simona; Italian Health Ministry, Department of Health Planning<br>Giordani, Cristina; Italian Health Ministry, Department of Health Planning<br>Manfellotto, Dario; Hospital Fatebenefratelli - AFaR, Department of Internal Medicine<br>Galli, Massimo; University of Milan L. Sacco Hospital, Institute of Tropical and Infectious Diseases<br>Mancia, Giuseppe; University of Milano-Bicocca, Clinical Medicine and Prevention; Ospedale San Gerardo, Clinia Medica |
| Keywords:                     | COVID-19, Health policy < HEALTH SERVICES ADMINISTRATION & MANAGEMENT, PUBLIC HEALTH                                                                                                                                                                                                                                                                                                                                                                                                                                                                                                                                                                                                                                                                                                                                                                                                                                                                                                                                                                                                                                                                                                                                                                                                                                               |
|                               |                                                                                                                                                                                                                                                                                                                                                                                                                                                                                                                                                                                                                                                                                                                                                                                                                                                                                                                                                                                                                                                                                                                                                                                                                                                                                                                                    |

SCHOLARONE™  
Manuscripts

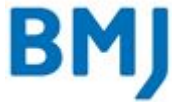

I, the Submitting Author has the right to grant and does grant on behalf of all authors of the Work (as defined in the below author licence), an exclusive licence and/or a non-exclusive licence for contributions from authors who are: i) UK Crown employees; ii) where BMJ has agreed a CC-BY licence shall apply, and/or iii) in accordance with the terms applicable for US Federal Government officers or employees acting as part of their official duties; on a worldwide, perpetual, irrevocable, royalty-free basis to BMJ Publishing Group Ltd ("BMJ") its licensees and where the relevant Journal is co-owned by BMJ to the co-owners of the Journal, to publish the Work in this journal and any other BMJ products and to exploit all rights, as set out in our [licence](#).

The Submitting Author accepts and understands that any supply made under these terms is made by BMJ to the Submitting Author unless you are acting as an employee on behalf of your employer or a postgraduate student of an affiliated institution which is paying any applicable article publishing charge ("APC") for Open Access articles. Where the Submitting Author wishes to make the Work available on an Open Access basis (and intends to pay the relevant APC), the terms of reuse of such Open Access shall be governed by a Creative Commons licence – details of these licences and which [Creative Commons](#) licence will apply to this Work are set out in our licence referred to above.

Other than as permitted in any relevant BMJ Author's Self Archiving Policies, I confirm this Work has not been accepted for publication elsewhere, is not being considered for publication elsewhere and does not duplicate material already published. I confirm all authors consent to publication of this Work and authorise the granting of this licence.

1  
2  
3  
4 **Addressing vaccination priority by stratifying general population according**  
5  
6  
7 **with frailty: the new Covid-19 vulnerability score (CVS)**  
8  
9

10  
11 Giovanni Corrao, PhD<sup>1,2</sup>, Federico Rea, PhD<sup>1,2</sup>, Flavia Carle, PhD<sup>1,3</sup>, Salvatore Scondotto, PhD<sup>1,4</sup>,  
12  
13 Alessandra Allotta, MSc<sup>4</sup>, Vito Lepore, MD<sup>5</sup>, Antonio D’Ettorre, MSc<sup>5</sup>, Cinzia Tanzarella, MSc<sup>5</sup>,  
14  
15 Patrizia Vittori, MSc<sup>6</sup>, Sabrina Abena, MSc<sup>6</sup>, Marica Iommi, PhD<sup>3</sup>, Liana Spazzafumo, MSc<sup>1,7</sup>,  
16  
17 Michele Ercolanoni, MSc<sup>8,9</sup>, Roberto Blaco, MSc<sup>9</sup>, Simona Carbone, MSc<sup>10</sup>, Cristina Giordani,  
18  
19 MSc<sup>10</sup>, Dario Manfellotto, MD<sup>11</sup>, Massimo Galli, MD<sup>12,13</sup>, Giuseppe Mancina, MD<sup>14,15</sup> on behalf of  
20  
21 the “Monitoring and Assessing care Pathways (MAP)” working group of the Italian Ministry of  
22  
23 Health  
24  
25  
26  
27  
28  
29

30 <sup>1</sup> National Centre for Healthcare Research and Pharmacoepidemiology, University of Milano-  
31 Bicocca, Milan, Italy

32 <sup>2</sup> Unit of Biostatistics, Epidemiology and Public Health, Department of Statistics and Quantitative  
33 Methods, University of Milano-Bicocca, Milan, Italy

34 <sup>3</sup> Center of Epidemiology and Biostatistics, Polytechnic University of Marche, Ancona, Italy

35 <sup>4</sup> Department of Health Services and Epidemiological Observatory, Regional Health Authority,  
36 Sicily Region, Palermo, Italy

37 <sup>5</sup> Regional Health Agency of Puglia (Agenzia regionale socio-sanitaria), Bari, Italy

38 <sup>6</sup> Regional Unit of Epidemiology and Social Policies, Regional Health Authority, Valle D’Aosta  
39 Region, Aosta, Italy

40 <sup>7</sup> Regional Health Agency of Marche, Ancona, Italy

41 <sup>8</sup> ARIA S.p.a., Milan, Italy

42 <sup>9</sup> Epidemiologic Observatory, Regional Welfare Service, Lombardy Region, Milan, Italy

43 <sup>10</sup> Department of Health Planning, Italian Health Ministry, Rome, Italy

44 <sup>11</sup> Department of Internal Medicine, Hospital Fatebenefratelli - AFaR, Isola Tiberina, Rome, Italy

45 <sup>12</sup> Infectious Diseases Unit, Luigi Sacco Hospital, Milan, Italy

46 <sup>13</sup> Department of Biomedical and Clinical Sciences, University of Milan, Milan, Italy

47 <sup>14</sup> Emeritus Professor, University of Milano-Bicocca, Milan, Italy

48 <sup>15</sup> Policlinico di Monza, Monza, Italy  
49  
50  
51  
52  
53  
54  
55  
56  
57  
58  
59  
60

1  
2  
3 Word count (manuscript): 3,041  
4

5 Tables: 1  
6

7 Figures: 3  
8  
9  
10  
11  
12

13 **Address for correspondence:** Prof. Giovanni Corrao, Dipartimento di Statistica e Metodi  
14 Quantitativi, Università degli Studi di Milano-Bicocca, Via Bicocca degli Arcimboldi, 8, Edificio  
15 U7, 20126 Milano, Italy. Tel.: +39.02.64485854; E-mail: giovanni.corrao@unimib.it  
16  
17  
18  
19  
20  
21  
22  
23  
24  
25  
26  
27  
28  
29  
30  
31  
32  
33  
34  
35  
36  
37  
38  
39  
40  
41  
42  
43  
44  
45  
46  
47  
48  
49  
50  
51  
52  
53  
54  
55  
56  
57  
58  
59  
60

1  
2  
3 “Monitoring and Assessing care Pathways” MAP working group (Italian Health Ministry, Health  
4 Planning Dept):  
5

- 6 • Italian Ministry of Health, Dept of Health Planning: Donata Bellentani, Simona Carbone  
7 (coordinator), Carla Ceccolini, Angela De Feo, Cristina Giordani, Rosanna Mariniello,  
8 Modesta Visca; Dept of health prevention: Natalia Magliocchetti, Giovanna Romano;  
9 External Expert: Antonio Lora, Paola Pisanti, Rinaldo Zanini.
  - 10 • Polytechnic University of Marche (coordinator): Flavia Carle, Marica Iommi, Edlira  
11 Skrami.
  - 12 • University of Milano-Bicocca, Laboratory of Healthcare Research &  
13 Pharmacoepidemiology: Anna Cantarutti, Giovanni Corrao, Matteo Monzio  
14 Compagnoni, Pietro Pugini, Federico Rea.
  - 15 • Department of Epidemiology Lazio Region: Marina Davoli, Mirko Di Martino, Adele  
16 Lallo.
  - 17 • Aosta Valley Region: Patrizia Vittori, Giuliana Vuillermin
  - 18 • Campania Region: Alfonso Bernardo, Anna Frusciante
  - 19 • Emilia Romagna Region: Laura Belotti, Rossana De Palma.
  - 20 • Friuli Venezia Giulia Region: Andrea Di Lenarda, Marisa Prezza
  - 21 • Lazio Region: Danilo Fusco, Chiara Marinacci
  - 22 • Lombardy Region: Roberto Blaco, Olivia Leoni
  - 23 • Marche Region: Liana Spazzafumo, Simone Pizzi
  - 24 • Molise Region: Lolita Gallo
  - 25 • Puglia Region: Ettore Attolini, Vito Lepore
  - 26 • Sicily Region: Salvatore Scodotto, Giovanni De Luca
  - 27 • Tuscany Region: Paolo Francesconi, Carla Rizzuti
  - 28 • Veneto Region: Francesco Avossa, Silvia Vigna
  - 29 • Research and Health Foundation (Fondazione ReS -Ricerca e Salute-): Letizia Dondi,  
30 Nello Martini, Antonella Pedrini, Carlo Piccinni
  - 31 • National Agency for Regional Health Services: Mimma Cosentino, Maria Grazia  
32 Marvulli
  - 33 • ANMCO (National Association of Hospital Cardiologists) Study Center: Aldo Maggioni
- 34  
35  
36  
37  
38  
39  
40  
41  
42  
43  
44  
45  
46  
47  
48  
49  
50  
51  
52  
53  
54  
55  
56  
57  
58  
59  
60

## Abstract

**Objectives.** To develop a new population-based risk stratification tool (Covid-Vulnerability Score, CVS) for predicting severe/fatal clinical manifestations of the SARS-CoV-2 infection using multiple source information provided by the healthcare utilization databases of the Italian National Health Service.

**Design.** Retrospective observational cohort study.

**Setting.** Population-based study using the healthcare utilization database of five Italian Regions.

**Participants.** Beneficiaries of the National Health Service, resident in one of the five participating Regions, aged 18-79 years, and not reside in a nursing home. The model was built from the 7,655,502 beneficiaries of the Lombardy Region Health Service.

**Main outcome measure.** The score included gender, age and 29 conditions selected from a list of 61 candidates for independently predicting severe/fatal clinical manifestations of infection. The outcome was the severe (ICU admitted)/fatal manifestations of Covid-19 experienced during the first epidemic wave (until June 2020). CVS performance was validated by applying the model to several validation sets (populations from Lombardy, second epidemic wave, and other four Italian regions during 2020) for a total of about 15.4 million individuals and 7,031 outcomes. Predictive performance was assessed by discrimination (areas under the ROC curve) and calibration (plot of observed vs. predicted outcomes).

**Results.** A clear positive trend towards increasing outcome incidence as CVS increases was observed. Areas under the ROC curve of CVS ranged from 0.85 to 0.88, which were better than those of generic scores such as the Charlson Comorbidity Score (0.60). A remarkable calibration of observed and predicted outcome probability was observed.

1  
2  
3 **Conclusions.** A simple score from data used for public health management accurately predicted  
4 the occurrence of severe/fatal manifestations of Covid-19. Because of its performance, the use of  
5 CVS may help health decision-makers to achieve more accurate identification of high-risk citizens  
6 who need early preventive interventions, mainly the vaccine coverage.  
7  
8  
9  
10  
11  
12  
13  
14  
15  
16  
17  
18  
19  
20  
21  
22  
23  
24  
25  
26  
27  
28  
29  
30  
31  
32  
33  
34  
35  
36  
37  
38  
39  
40  
41  
42  
43  
44  
45  
46  
47  
48  
49  
50  
51  
52  
53  
54  
55  
56  
57  
58  
59  
60

For peer review only



### Strengths and limitations of this study

- The Covid-19-Vulnerability-Score (CVS), based on demographic (age and gender) and clinical (29 conditions and diseases) predictors, is able to predict severe/fatal clinical manifestations of SARS-CoV-2 infection among citizen aged 18-79 years.
- The score may be easily drawn from electronic health databases covering beneficiaries of health systems (e.g., National Health Service, health insurance companies).
- The CVS showed a better discriminating power than other comorbidities scores, and it performed similarly well across Italian Regions as well as across time (first and second epidemic waves).
- Predictors were restricted to those routinely collected and available in the Italian administrative databases, thus education, functional status, and socioeconomic information were not included.

## Introduction

The pandemic spread of the SARS-CoV-2 virus has dramatically exceeded the diagnostic and treatment capabilities of virtually all countries around the world. This has fuelled a debate on the need to establish priority criteria that might identify Covid-19 patients at greater risk to progress to hospitalization or a fatal event, in order to make them the preferential recipients of currently available effective treatment strategies, the goal being to reduce the number of deaths and prevent collapse of hospital facilities. The problem involves who should receive early diagnostic testing, who can be treated outside hospital among infected people, who should be given new, sometimes expensive and necessarily rationed drugs (e.g., monoclonal antibodies [1]) and who should be selected for early vaccination. The case of vaccination is particularly delicate because demand will outstrip supply for many months ahead.

Associations between certain chronic diseases and conditions and serious/critical/fatal clinical manifestations of the SARS-CoV-2 infection have been reported from several studies [2-4], so opening the gate towards identifying multiple prognostic factors for the Covid-19 disease. However, although some factors have been accepted as “established” by the scientific community, their overall predictive value has not been robustly evaluated [5]. It should be in addition considered that basing the prediction on a list of individual conditions or diseases does not take into account that comorbidities can make the global risk different from that predictable by individual contributions. Finally, some predictive scores have been proposed and validated in hospital care settings [6,7], their use requiring specialized image acquisition or sophisticated laboratory examinations, which might be hardly applicable to the population at large. This implies that developing a score able to reliably predict the risk of progression of the Covid-19 disease to its most severe or lethal forms in the general population via simple and easily collectable information would be a valuable goal.

1  
2  
3 Our population-based study was performed under the auspices of the Italian Health Ministry. We  
4  
5 aimed to develop and validate a novel score predictive of severe/fatal clinical manifestations of  
6  
7 the SARS-CoV-2 infection using the multiple source information provided by the healthcare  
8  
9 utilization databases of the Italian National Health Service (NHS).  
10  
11  
12

## 13 **Methods**

### 14 **Setting**

15  
16  
17 This study was based on the NHS beneficiaries of five Italian Regions that voluntarily joined the  
18  
19 protocol and contributed to the data collection. The Regions are located in Northern (Valle d'Aosta  
20  
21 and Lombardy), Central (Marche), Southern (Puglia) and Islands (Sicily) of Italy. Overall, the data  
22  
23 covered nearly 20.5 million people (34% of the entire Italian population) who during 2020  
24  
25 experienced 712,408 cases of Covid-19, with a total of 31,957 deaths. Selected features of the  
26  
27 participating Regions are reported in supplementary **Table S1**.  
28  
29  
30  
31  
32

### 33 **Data sources**

34  
35  
36 All Italian citizens have equal access to healthcare services provided by the NHS. Computerized  
37  
38 information systems on the provided services have been created within each of the 21 Italian  
39  
40 Regions and autonomous Provinces, the related regional health care databases including 1)  
41  
42 demographic and administrative data of residents who receive NHS assistance (the NHS  
43  
44 beneficiaries, practically coincident with the entire resident population); 2) hospital discharge  
45  
46 records reporting information on the primary diagnosis, as well as on up to five coexisting  
47  
48 conditions and procedures, coded according to the ICD-9-CM classification system  
49  
50 (<http://icd9.chrisendres.com/>); and 3) drug prescriptions reimbursed by the NHS, coded according  
51  
52 to the Anatomical Therapeutic Chemical (ATC) classification system  
53  
54 ([https://www.whocc.no/atc\\_ddd\\_index/](https://www.whocc.no/atc_ddd_index/)). Since the starting of the Covid-19 pandemic, almost all  
55  
56 Regions established, under the coordination of the National Health Institute, a population-based  
57  
58  
59  
60

1  
2  
3 registry of patients with a confirmed diagnosis of infection with the SARS-CoV-2 virus, and,  
4  
5 among these, those who were admitted to Intensive Care Units or died. In the present study, these  
6  
7 various types of data were interconnected by using for each citizen a single identification code in  
8  
9 all databases. To preserve privacy, each identification code was automatically deidentified.  
10  
11 Analyses of the regional databases were performed under the rule that the inverse process, i.e.  
12  
13 patient identification, was allowed only to the Regional Health Authority upon request from the  
14  
15 judicial authority.  
16  
17

### 18 19 **Candidate predictors**

20  
21  
22 Taking into consideration the morbidity and mortality predictors reported in epidemiological  
23  
24 studies [5,7-9], as well as comorbidity scores widely used worldwide or tuned to the Italian  
25  
26 population (the Charlson index (CCI) [10] and the Multisource Comorbidity Score (MCS),  
27  
28 developed for the general Italian population [11]), we identified 61 candidate predictors. Twenty-  
29  
30 seven candidate predictors were traced from inpatients diagnostic codes, five from outpatients who  
31  
32 were prescribed drugs, and the remaining twenty-nine from both diagnostic and therapeutic codes,  
33  
34 depending on the availability of specific diagnostic codes and drug therapies. Four of us (FR, DM,  
35  
36 MG and GM) independently attributed the ICD-9 and ATC codes to the individuals in whom one  
37  
38 or more of the 61 candidate predictors were detectable. Discrepancies were resolved in conference.  
39  
40 The list of candidate predictors, and the corresponding codes, are reported in supplementary **Table**  
41  
42 **S2**.  
43  
44  
45  
46  
47

### 48 49 **Score development**

50  
51 Since among the five participating Regions, Lombardy has the largest resident population (16%  
52  
53 of the entire Italian population) and had been hit by the pandemic more than any other Region  
54  
55 during the months between March and June 2020 (in that period 48% of the Covid-19 deaths  
56  
57 registered in Italy occurred in Lombardy), we elected to use the data from the first epidemic wave  
58  
59 that hit Lombardy to develop the score.  
60

1  
2  
3 We included all the NHS beneficiaries who at February 21, 2020 were resident in Lombardy since  
4 at least two years, were aged 18 to 79 years, and did not reside in a nursing home. Multivariate  
5 logistic regression was fitted for investigating the association between gender, four age classes  
6 (18-45, 46-59, 60-69 and 70-79 years) plus the above-mentioned 61 candidate predictors and the  
7 odds of experiencing the outcome of interest, which was the composite of hospitalization in an  
8 Intensive Care Unit or death with a Covid-19 diagnosis, up to June 30, 2020. Candidate predictors  
9 entered as dichotomous variables in the model, with value 1 or 0 according to whether the specific  
10 condition was or was not recorded at least once within the 781 days prior to the baseline period,  
11 i.e., from January 1<sup>st</sup>, 2018 until February 20, 2020. The least absolute shrinkage and selection  
12 operator (LASSO) method was applied for selecting the conditions able to predict the outcome  
13 [12]. Finally, a score was assigned to each condition selected with the LASSO method by using  
14 the coefficient estimated from the model. The coefficient was converted into a score by  
15 multiplication by 10 and rounding to the nearest whole number. Scores were sequentially summed  
16 to produce a total aggregate score. The index so obtained was termed Covid Vulnerability Score  
17 (CVS). To verify the extension of the association between the increasing value of the score and  
18 the increasing occurrence of severe/fatal forms of Covid-19, CVS categories of width 10 was  
19 plotted against the outcome incidence. The prevalence of the Lombardy cohort members according  
20 to CVS categories was also calculated. Restricted cubic spline with 3 degrees of freedom was used  
21 to represent the corresponding smoothed trends [13].

### 22 23 24 25 26 27 28 29 30 31 32 33 34 35 36 37 38 39 40 41 42 43 44 45 46 47 **Score validation and performance**

48  
49  
50 Validity of CVS was investigated by applying the score developed from the Lombardy cohort hit  
51 by the first pandemic wave (derivation set) to several validation sets selected by using the same  
52 inclusion/exclusion criteria of the derivation one. One validation set consisted of the cohort of  
53 Lombardy NHS beneficiaries who were free of Covid-19 up to July 1, 2020, after which date a  
54 new observation period was started and continued until censorship at the outcome occurrence  
55  
56  
57  
58  
59  
60

1  
2  
3 (intensive care admissions or deaths) or at December 31, 2020, whatever happened first. Other  
4 validation sets consisted of NHS beneficiaries from each of the other regions included in the study.  
5  
6 For these other regional cohorts, observations started on March 1, 2020 and was censored at the  
7  
8 outcome occurrence or at December 31, 2020, whatever happened first.  
9  
10

11  
12 The performance of CVS was assessed through discrimination and calibration. Discrimination was  
13 evaluated by the Receiver Operating Characteristic (ROC) curves and the corresponding  
14 underlying areas (AUCs) [14]. Calibration plots displayed observed vs. predicted outcome  
15 probabilities. The Hosmer-Lemeshow goodness-of-fit test modified by Yu et al [15] was used for  
16 testing the null hypothesis of agreement between observed and predicted outcome probabilities.  
17  
18  
19  
20  
21  
22  
23

### 24 **Patient and Public involvement**

25  
26 No patients were involved in setting the research question or the outcome measures, nor were they  
27 involved in developing plans for design or implementation of the study. No patients were asked to  
28 advise on interpretation or writing up of results.  
29  
30  
31  
32  
33  
34  
35  
36  
37

## 38 **Results**

### 39 **Covid-19 Vulnerability Score**

40  
41 The 31 demographic and clinical conditions that significantly contributed to CVS are reported in  
42 **Table 1**. As expected, older age was the major contributor to the outcome of interest, but even  
43 male gender gave a relevant contribution. Nearly 40% of NHS beneficiaries had at least one  
44 clinical condition contributing to CVS. Diabetes (especially if under insulin therapy), psychosis,  
45 coronary and peripheral vascular disease, gout, use of corticosteroids, human immunodeficiency  
46 virus (HIV) infection, malignancies and anaemias were the most relevant contributors of the  
47 outcome. However, other 19 clinical conditions (ranging across all major nosologic  
48 macrocategories) contributed to CVS.  
49  
50  
51  
52  
53  
54  
55  
56  
57  
58  
59  
60

1  
2  
3 **Figure 1, upper box**, shows that the probability of experiencing the outcome of interest had a  
4 clear positive trend as CVS increased, the risk being lower than 0.05% for CVS value  $\leq 29$ ,  
5 progressing to 2% for a CVS value between 60 and 69, and reaching a much higher value (around  
6 4%) for CVS values  $\geq 80$ . Sixty-nine percent of NHS beneficiaries had a CVS value  $\leq 29$ , almost  
7 30% ranged from 30 and 69, and less than 1% (0.16%) exhibited a CVS value  $\geq 70$  (**Figure 1,**  
8 **lower box**).

### 17 **Covid-19 Vulnerability Score performance**

18  
19  
20  
21 **Figure 2, left box**, shows that the area under the ROC curve of CVS was 0.89. This compared  
22 favourably with the AUC of the models based on scores not specifically addressing Covid-19  
23 whose AUC values were 0.60 and 0.77 for the CCI and MCS, respectively. The 95% confidence  
24 intervals are not indicated in the Figure because, due to the very large sample size, they practically  
25 coincided with the AUC values. As shown in **Figure 2, right box**, the CVS AUC values were  
26 0.88, 0.86, 0.86, 0.85 and 0.86 for Lombardy, Valle d'Aosta, Marche, Puglia and Sicily cohorts,  
27 respectively.

28  
29  
30  
31  
32  
33  
34  
35  
36  
37 **Figure 3** shows that there was a good agreement between the observed and the predicted outcome  
38 probabilities, with calibration intercept close to the ideal value of 0 and recalibration slope close  
39 to the ideal value of 1 (0.93). The null hypothesis of agreement between observed and predicted  
40 frequencies could not be rejected according to the modified Hosmer-Lemeshow test.

## 47 **Discussion**

48  
49  
50  
51 Our study shows that a simple score based on demographic and clinical information derived from  
52 healthcare utilization data currently used by all Italian Regions for the management of NHS is able  
53 to stratify NHS beneficiaries aged 18 to 79 years according to their risk to develop severe/fatal  
54 clinical manifestations of Covid-19. In a very large number of individuals from several Italian  
55 Regions the score we developed (termed Covid Vulnerability Score or CVS) exhibited a

1  
2  
3 significantly better discriminating power than the CCI, i.e. the most worldwide used comorbidity  
4 score [10] which has been recently validated also for predicting mortality in Covid-19 patients  
5 hospitalised for pneumonia [16]. Furthermore, CVS outperformed a comorbidity score recently  
6 validated by our group for the general Italian population and found to outperform the CCI. This  
7 allows concluding that our CVS can reliably identify people in whom age, gender and a variety of  
8 comorbidities interact to make them frailer to the development of the severe and fatal clinical  
9 manifestations of the Covid-19 infection. This may provide a useful tool for establishing priority  
10 in the vaccination programs for the general Italian population up to 79 years of age, with the  
11 exception of the priority given to individuals involved in specific job categories, is currently based  
12 in a descending fashion on age alone as well as on individually listed conditions or diseases that  
13 have shown a greater prevalence of severe or lethal Covid-19 infections in clinical studies. This  
14 tool may find a useful application also for the establishment of priority access to future treatment  
15 options, such as monoclonal antibodies, if their cost will be too high to allow NHS to plan an  
16 extended use.  
17  
18  
19  
20  
21  
22  
23  
24  
25  
26  
27  
28  
29  
30  
31  
32  
33  
34  
35

36 Our study identified several prognostic factors that, in addition to age and gender, predict the  
37 severity of Covid-19 and are included among the medical illnesses and dispensed drugs retrievable  
38 in the healthcare utilization database. Consistently with a recent meta-analysis [4], diabetes  
39 (mainly when under insulin therapy), cardiovascular disease (mainly coronary and peripheral  
40 vascular disease), hypertension, malignancies, chronic respiratory and kidney diseases, dementia  
41 and obesity were all associated with the Covid-19 outcome. People with HIV [17], and those who  
42 had a recent history of severe clinical manifestations of an infectious disease, including  
43 tuberculosis [18], also showed a significant association. Additionally, and according with other  
44 studies, we found that diseases of the neurological system (e.g., epilepsy, recurrent seizures [19]  
45 and Parkinson disease and parkinsonism [20]), of the gastrointestinal tract (e.g., liver cirrhosis and  
46 other liver chronic diseases [21]), of the metabolism (e.g., gout [22]), of the skin (e.g. psoriasis  
47  
48  
49  
50  
51  
52  
53  
54  
55  
56  
57  
58  
59  
60



1  
2  
3 [23]), and of the blood and blood-forming organs (e.g. coagulation defects [24], anaemias [25])  
4  
5 contributed to the Covid-19 related clinical frailty. We also confirmed the involvement of frailty  
6  
7 conditions related to mental disorders, such as psychosis and depression [26] as well as of recent  
8  
9 dispensations of drugs with immunosuppressive properties (such as corticosteroids [27]) agents  
10  
11 against chronic pain, e.g., narcotic analgesics [28]), and with an anticoagulant [29] action. This  
12  
13 confirms the now established notion that alterations of the structure and function of virtually all  
14  
15 organs and systems of the body may adversely affect resistance to the Covid-19 disease. It should  
16  
17 be emphasized that the association between the severity of Covid-19 and the dispensed drugs we  
18  
19 found in our study is not in contrast with the frequent use of some of these drugs for the treatment  
20  
21 of Covid-19, because in our analysis previous drug therapies were searched for to further track  
22  
23 background comorbidities and not to investigate their possible direct effect on the disease. In this  
24  
25 context, it is likely that use of corticosteroids and other immunosuppressive agents reflected the  
26  
27 existence of autoimmune diseases, while use of anticoagulants reflected the existence of atrial  
28  
29 fibrillation, thromboembolic states or other cardiovascular disorders, which have been shown to  
30  
31 reduce patients' defence against and resistance to the virus [30].  
32  
33  
34  
35  
36  
37

38 Our study has implications for several aspects of the public health policy against Covid-19 to be  
39  
40 considered in the future, in particular, as mentioned above, for the vaccination program planned  
41  
42 by the Italian Ministry of Health. This program offers cost-free priority immunization to  
43  
44 individuals carrying on jobs of fundamental social importance as well as to those in whom  
45  
46 exposure to the infection is high. This is followed by people aged 80 years and older while in  
47  
48 people aged 79 years or below vaccination is planned in the later stages of the vaccination program  
49  
50 possibly (but this is not yet entirely clear) giving priority to people with serious comorbidities. The  
51  
52 rationale for offering early vaccination to the oldest fraction of the population is strong because of  
53  
54 the 24,575 severe/fatal cases of Covid-19 registered in Lombardy during 2020, almost 12,593  
55  
56 (51%) occurred in people aged 80 years and older. Furthermore, in Italy the average age of Covid-  
57  
58  
59  
60

1  
2  
3 19 fatalities during the entire pandemic period have been recently reported to be 82 years, which  
4 means that search for and use of a risk score more complex than age alone in octogenarians and  
5 nonagenarians may carry a limited practical advantage. On the contrary, use of our score may offer  
6 the possibility of identifying accurately younger high-risk people to whom offer vaccination at an  
7 earlier time.  
8  
9

10  
11  
12  
13  
14  
15 The present study has several strengths. Because in Italy a public funded healthcare system  
16 involves virtually all citizens, our sample of NHS beneficiaries had not only an extremely large  
17 size but also reflected an unselected population. It is also a strength that the Italian healthcare  
18 utilization database allows to track services provided by the NHS with considerable accuracy  
19 because providers must document services to claim reimbursement, and incorrect reports carry  
20 legal consequences. It should also be emphasized the excellent ability of CVS for discriminating  
21 individuals who will experience and those who will not experience Covid-19 related serious  
22 complications. Finally, it is also remarkable that, although built according to Lombardy data  
23 collected during the first epidemic wave (i.e. before the summer 2020), CVS performed similarly  
24 well during the second epidemic wave (i.e. after the summer 2020) as well as in areas of Italy  
25 different from Lombardy for social features, climatic characteristics, and intensity of the epidemic  
26 spread. This suggests that the advantages of the CVS score for stratification of the risk the Covid-  
27 19 complications extends across different temporal and geographic conditions.  
28  
29  
30  
31  
32  
33  
34  
35  
36  
37  
38  
39  
40  
41  
42  
43  
44

45 Limitations are that the predictors of Covid-19 we searched for are restricted to those routinely  
46 collected and available in the administrative databases, which are the same for all Regions of Italy,  
47 i.e., hospital admissions and drug dispensed. In addition, our scoring system did not capture the  
48 severity of associated comorbidities. Furthermore, health services and treatments supplied by  
49 private providers were not captured by our analysis. Moreover, misdiagnosis (due to poor accuracy  
50 in reporting diagnoses and comorbidities) and upcoding in hospital records (sometimes in pursuit  
51 of higher reimbursements) might have generated too conservative estimates of the CVS  
52  
53  
54  
55  
56  
57  
58  
59  
60

1  
2  
3 performance. Finally, our approach may have failed to identify comorbidities that were as severe,  
4  
5 debilitating or incapacitating as to substantially limit social contacts, thereby escaping infection  
6  
7 by the SARS-CoV-2 virus. However, because the purpose of our study was to identify individuals  
8  
9 at greater risk of severe/fatal clinical manifestations in order to offer them earlier protection,  
10  
11 patients with a disease so debilitating as to make them unexposed to the infection would belong to  
12  
13 a low risk category anyway.  
14  
15

## 16 17 **Conclusion**

18  
19  
20 In summary, we developed and validated a simple score derived from data used for public health  
21  
22 management, which predicts severe/fatal outcomes of Covid-19 in a large number of beneficiaries  
23  
24 of the Italian NHS more accurately than other available scores. Our findings show that this can be  
25  
26 achieved by combined use of demographic (age and gender) and clinical (29 conditions/diseases)  
27  
28 predictors of the outcome. Because of its performance, use of this score may help health decision  
29  
30 makers to achieve a more accurate identification of high-risk citizens who need early preventive  
31  
32 interventions, mainly the vaccine coverage.  
33  
34  
35  
36  
37  
38  
39  
40  
41  
42  
43  
44  
45  
46  
47  
48  
49  
50  
51  
52  
53  
54  
55  
56  
57  
58  
59  
60

## Funding

This study was funded by a research grant from the Italian Health Ministry: “Modelli per il monitoraggio e la valutazione delle cure integrate (CI) nell’ambito del Nuovo Sistema di Garanzia dell’assistenza sanitaria“ project (grant number J59H06000160001). The funding source had no role in the design and conduct of the study; collection, management, analysis, and interpretation of the data; preparation, review, or approval of the manuscript; and decision to submit the manuscript for publication.

## Conflicts of Interest

Giovanni Corrao received research support from the European Community (EC), the Italian Agency of Drug (AIFA), and the Italian Ministry of Education, University and Research (MIUR). He took part to a variety of projects that were funded by pharmaceutical companies (i.e., Novartis, GSK, Roche, AMGEN and BMS). He also received honoraria as member of Advisory Board from Roche.

Giuseppe Mancia received honoraria for participation as speaker/chairman in national/international meetings from Boehringer Ingelheim, Ferrer, Medtronic, Menarini Int, Merck Serono, Recordati, and Servier.

For the remaining authors, nothing was declared.

## Contributors

GC conceived the idea for this manuscript. GC, FR and FC designed the study. GC and GM drafted the manuscript. FR, AA, ADE, SA, MI and ME performed the data analysis. SS, VL, CT, PV, LS,

1  
2  
3 and RB extracted the data and authorised their utilisation. All authors assisted the results  
4  
5 interpretation and manuscript revision. All authors read and approved the final manuscript.  
6  
7  
8  
9

### 10 11 **Ethical approval**

12  
13  
14 Under the rules of the Italian Drugs Agency (available at:  
15  
16 [http://www.agenziafarmaco.gov.it/sites/default/files/det\\_20marzo2008.pdf](http://www.agenziafarmaco.gov.it/sites/default/files/det_20marzo2008.pdf)), retrospective studies  
17  
18 using administrative databases do not require Ethics Committee protocol approval.  
19  
20  
21  
22  
23  
24  
25

### 26 **Data sharing**

27  
28  
29 The data that support the findings of this study are available from the Italian Regions, but  
30  
31 restrictions apply to the availability of these data, which were used under license for the current  
32  
33 study, and so are not publicly available. Data are however available from the Italian Regions upon  
34  
35 reasonable request.  
36  
37  
38  
39  
40  
41

### 42 **Dissemination to participants and related patient and public communities**

43  
44  
45 There are no plans to disseminate the results of the research to study participants or the relevant  
46  
47 patient community.  
48  
49  
50  
51  
52  
53

54 The lead author (the manuscript's guarantor) affirms that the manuscript is an honest, accurate,  
55  
56 and transparent account of the study being reported; that no important aspects of the study have  
57  
58 been omitted; and that any discrepancies from the study as planned (and, if relevant, registered)  
59  
60 have been explained

1  
2  
3  
4  
5  
6  
7  
8  
9  
10  
11  
12  
13  
14  
15  
16  
17  
18  
19  
20  
21  
22  
23  
24  
25  
26  
27  
28  
29  
30  
31  
32  
33  
34  
35  
36  
37  
38  
39  
40  
41  
42  
43  
44  
45  
46  
47  
48  
49  
50  
51  
52  
53  
54  
55  
56  
57  
58  
59  
60

For peer review only

## References

- [1] Lloyd EC, Gandhi TN, Petty LA. Monoclonal Antibodies for COVID-19. JAMA. 2021 Feb 5. doi: 10.1001/jama.2021.1225. Epub ahead of print. PMID: 33544136
- [2] Földi M, Farkas N, Kiss S, et al. Obesity is a risk factor for developing critical condition in COVID-19 patients: A systematic review and meta-analysis. *Obes Rev.* 2020 Oct;21(10):e13095
- [3] Mantovani A, Byrne CD, Zheng MH, Targher G. Diabetes as a risk factor for greater COVID-19 severity and in-hospital death: A meta-analysis of observational studies. *Nutr Metab Cardiovasc Dis* 2020;30:1236-48
- [4] Lippi G., Wong J., Henry B. M. Hypertension and its severity or mortality in Coronavirus Disease 2019 (COVID-19): a pooled analysis. *Polish Archives of Internal Medicine* 2020 doi: 10.20452/pamw.15272
- [5] Izcovich A, Ragusa MA, Tortosa F, et al. Prognostic factors for severity and mortality in patients infected with COVID-19: A systematic review. *PLoS One* 2020;15:e0241955
- [6] Liang W, Liang H, Ou L, Chen B, Chen A, Li C, et al. Development and Validation of a Clinical Risk Score to Predict the Occurrence of Critical Illness in Hospitalized Patients with COVID-19. *JAMA Intern Med.* 2020; 10.1001/jamainternmed.2020.2033
- [7] Wynants L, Van Calster B, Collins GS, et al. Prediction models for diagnosis and prognosis of covid-19 infection: systematic review and critical appraisal. *BMJ* 2020;369:m1328
- [8] Gupta RK, Marks M, Samuels THA, et al; UCLH COVID-19 Reporting Group. Systematic evaluation and external validation of 22 prognostic models among hospitalised adults with COVID-19: an observational cohort study. *Eur Respir J* 2020;56:2003498
- [9] Ebrahimi M, Malehi AS, Rahim F. COVID-19 Patients: A Systematic Review and Meta-Analysis of Laboratory Findings, Comorbidities, and Clinical Outcomes Comparing Medical Staff versus the General Population. *Osong Public Health Res Perspect* 2020;11:269-79

- 1  
2  
3 [10] Charlson ME, Pompei P, Ales KL, MacKenzie CR. A new method of classifying prognostic  
4 comorbidity in longitudinal studies: development and validation. *J Chronic Dis* 1987;40:373-83  
5  
6  
7 [11] Corrao G, Rea F, Di Martino M, et al. Developing and validating a novel multisource  
8 comorbidity score from administrative data: a large population-based cohort study from Italy. *BMJ*  
9  
10  
11  
12 Open 2017;7:e019503  
13  
14 [12] Tibshirani R. The LASSO method for variable selection in the Cox model. *Stat Med*  
15  
16  
17 1997;16:385-95  
18  
19 [13] Gauthier J, Wu QV, Gooley TA. Cubic splines to model relationships between continuous  
20  
21  
22 variables and outcomes: a guide for clinicians. *Bone Marrow Transplantation* 2020;55:675-80  
23  
24 [14] Pencina MJ, D'Agostino RB Sr, D'Agostino RB Jr. Evaluating the added predictive ability of  
25  
26  
27 a new marker: From area under the ROC curve to reclassification and beyond. *Stat Med*  
28  
29  
30 2008;27:157-72  
31  
32 [15] Yu W, Xu W, Zhu L. A modified Hosmer–Lemeshow test for large data sets. *Communications*  
33  
34  
35 in Statistics - Theory and Methods 2017;46:11813-25  
36  
37 [16] Christensen DM, Strange JE, Gislason G, et al. Charlson Comorbidity Index Score and Risk  
38  
39  
40 of Severe Outcome and Death in Danish COVID-19 Patients. *J Gen Intern Med* 2020;35:2801-3  
41  
42 [17] Shareef MA, Bashaiwth HM, AlAkbari AO, et al. A systematic review of contemporary  
43  
44  
45 evidence on SARS-CoV-2 and HIV coinfection: What does it look like up to date? *Avicenna J*  
46  
47  
48 *Med* 2020;10:189-97  
49  
50 [18] Liu Y., Bi L., Chen Y. Active or latent tuberculosis increases susceptibility to COVID-19 and  
51  
52  
53 disease severity. *medRxiv*. March 2020 doi: 10.1101/2020.03.10.20033795. 2020.03.10.20033795  
54  
55 [19] Cabezudo-Garcia P, Ciano-Petersen NL, Mena-Vazquez N, et al. Incidence and case fatality  
56  
57  
58 rate of COVID-19 in patients with active epilepsy. *Neurology* 2020;95:e1417-e1425  
59  
60 [20] Vignatelli L, Zenesini C, Belotti LMB, et al. Risk of hospitalization and death for COVID-19  
in people with Parkinson's disease or parkinsonism. *Mov Disord*. 2020 Nov  
16:10.1002/mds.28408



- 1  
2  
3 [21] Bajaj JS, Garcia-Tsao G, Wong F, et al. Cirrhosis is associated with high mortality and  
4 readmissions over 90 days regardless of COVID-19: A multi-center cohort. *Liver Transpl* 2021  
5 Jan 11. doi: 10.1002/lt.25981  
6  
7  
8  
9  
10 [22] Safdarian AR, Momenzadeh K, Kahe F, Farhangnia P, Rezaei N. Death due to COVID-19 in  
11 a patient with diabetes, epilepsy, and gout comorbidities. *Clin Case Rep* 2020 Nov  
12 25:10.1002/ccr3.3557  
13  
14  
15  
16 [23] Mahil SK, Dand N, Mason KJ, et al. Factors associated with adverse COVID-19 outcomes in  
17 patients with psoriasis-insights from a global registry-based study. *J Allergy Clin Immunol*  
18 2021;147:60-71  
19  
20  
21  
22  
23 [24] Tang N, Li D, Wang X, Sun Z. Abnormal coagulation parameters are associated with poor  
24 prognosis in patients with novel coronavirus pneumonia. *J Thromb Haemost* 2020;18:844-7  
25  
26  
27  
28 [25] Roy NBA, Telfer P, Eleftheriou P, et al. Protecting vulnerable patients with inherited  
29 anaemias from unnecessary death during the COVID-19 pandemic. *Br J Haematol* 2020;189:635-9  
30  
31  
32  
33 [26] Druss BG. Addressing the COVID-19 pandemic in populations with serious mental illness.  
34 *JAMA Psychiatry* 2020;77:891-2  
35  
36  
37 [27] Suissa S, Patenaude V, Lapi F, Erns P. Inhaled corticosteroids in COPD and the risk of serious  
38 pneumonia. *Thorax* 2013;68:1029-36  
39  
40  
41  
42 [28] Wiese AD, Griffin MR, Schaffner W, et al. Long-acting Opioid Use and the Risk of Serious  
43 Infections: A Retrospective Cohort Study. *Clin Infect Dis* 2019;68:1862-9  
44  
45  
46  
47 [29] Kollias A, Kyriakoulis KG, Dimakakos E, et al. Thromboembolic risk and anticoagulant therapy  
48 in COVID-19 patients: emerging evidence and call for action. *Br J Haematol* 2020;189:846-7  
49  
50  
51  
52 [30] Rentsch CT, Beckman JA, Tomlinson L, et al. Early initiation of prophylactic anticoagulation  
53 for prevention of COVID-19 mortality: a nationwide cohort study of hospitalized patients in the  
54 United States. *medRxiv*. 2020 Dec 11:2020.12.09.20246579  
55  
56  
57  
58  
59  
60

**Table 1.** Prevalence of male gender, age categories and 29 conditions/diseases contributing to the Covid Vulnerability Score (CVS). For each listed contributor, the outcome incidence among the exposed people, the odds ratio (and 90% confidence interval), and the corresponding weight of the contribution to CVS, are reported

|                                                        | No. (%)           | No. outcome events | Incidence every 10,000 | Odds ratio† | (90% confidence interval†) | Weight‡ |
|--------------------------------------------------------|-------------------|--------------------|------------------------|-------------|----------------------------|---------|
| Male gender                                            | 3,797,636 (49.6%) | 6,849              | 18.0                   | 3.07        | 2.95 to 3.19               | 11      |
| Age ≤ 45                                               | 3,111,426 (40.6%) | 271                | 0.9                    | 1.00        | (reference)                | 0       |
| Age 46-59                                              | 2,305,062 (30.1%) | 1,435              | 6.2                    | 5.95        | (5.36 to 6.62)             | 18      |
| Age 60-69                                              | 1,222,310 (16.0%) | 2,506              | 20.5                   | 15.62       | (14.09 to 17.32)           | 27      |
| Age 70-79                                              | 1,016,704 (13.3%) | 4,948              | 48.7                   | 27.64       | (24.96 to 30.61)           | 33      |
| HIV infection                                          | 31,300 (0.4%)     | 154                | 49.2                   | 1.52        | (1.33 to 1.74)             | 4       |
| Other infectious and parasitic diseases                | 42,422 (0.6%)     | 443                | 104.4                  | 1.37        | (1.26 to 1.49)             | 3       |
| Malignancies                                           | 177,024 (2.3%)    | 1,073              | 60.6                   | 1.42        | (1.35 to 1.50)             | 4       |
| Diabetes without insulin therapy                       | 278,785 (3.6%)    | 1,419              | 50.9                   | 1.60        | (1.53 to 1.68)             | 5       |
| Insulin therapy                                        | 101,996 (1.3%)    | 973                | 95.4                   | 2.35        | (2.21 to 2.49)             | 9       |
| Obesity                                                | 16,571 (0.2%)     | 103                | 62.2                   | 1.34        | (1.13 to 1.58)             | 3       |
| Disorders of fluid, electrolyte, and acid-base balance | 8,576 (0.1%)      | 135                | 157.4                  | 1.29        | (1.11 to 1.49)             | 3       |
| Gout                                                   | 164,428 (2.2%)    | 1,518              | 92.3                   | 1.57        | (1.50 to 1.66)             | 5       |
| Coagulation defects                                    | 3,603 (0.1%)      | 36                 | 99.9                   | 1.41        | (1.07 to 1.85)             | 3       |
| Anaemias                                               | 613,430 (8.0%)    | 2,228              | 36.3                   | 1.51        | (1.45 to 1.58)             | 4       |
| Dementia / Alzheimer                                   | 12,671 (0.2%)     | 145                | 114.4                  | 1.26        | (1.09 to 1.46)             | 2       |
| Psychosis                                              | 138,034 (1.8%)    | 684                | 49.6                   | 1.94        | (1.80 to 2.08)             | 7       |
| Depression                                             | 588,688 (7.7%)    | 1,729              | 29.4                   | 1.35        | (1.29 to 1.42)             | 3       |
| Parkinson's disease and parkinsonism                   | 40,885 (0.5%)     | 274                | 67.0                   | 1.21        | (1.09 to 1.34)             | 2       |
| Epilepsy and recurrent seizures                        | 122,171 (1.6%)    | 510                | 41.7                   | 1.37        | (1.26 to 1.48)             | 3       |
| Other diseases of the nervous system and sense organs  | 35,495 (0.5%)     | 253                | 71.3                   | 1.26        | (1.13 to 1.40)             | 2       |
| Ischaemic Heart Disease/Angina                         | 91,539 (1.2%)     | 845                | 92.3                   | 1.18        | (1.11 to 1.26)             | 2       |
| Heart failure                                          | 21,840 (0.3%)     | 428                | 196.0                  | 1.30        | (1.18 to 1.43)             | 3       |
| Vascular diseases                                      | 14,936 (0.2%)     | 217                | 145.3                  | 1.17        | (1.04 to 1.32)             | 2       |
| Cerebrovascular diseases                               | 35,205 (0.5%)     | 333                | 94.6                   | 1.12        | (1.02 to 1.23)             | 1       |
| Hypertension                                           | 796,044 (10.4%)   | 3,136              | 39.4                   | 1.20        | (1.15 to 1.25)             | 2       |

|                                                           |                   |       |       |      |                |   |
|-----------------------------------------------------------|-------------------|-------|-------|------|----------------|---|
| Coronary and peripheral vascular disease                  | 658,737 (8.6%)    | 2,668 | 40.5  | 1.75 | (1.68 to 1.82) | 6 |
| Oral anticoagulant agents                                 | 144,713 (1.9%)    | 1,221 | 84.4  | 1.39 | (1.32 to 1.47) | 3 |
| COPD/Asthma                                               | 20,034 (0.3%)     | 268   | 133.8 | 1.15 | (1.03 to 1.28) | 1 |
| Liver cirrhosis and other liver chronic diseases          | 29,484 (0.4%)     | 177   | 60.0  | 1.31 | (1.16 to 1.49) | 3 |
| Chronic kidney disease                                    | 17,109 (0.2%)     | 371   | 216.8 | 1.32 | (1.20 to 1.46) | 3 |
| Diseases of the skin and subcutaneous tissues             | 106,747 (1.4%)    | 353   | 33.1  | 1.10 | (1.00 to 1.20) | 1 |
| Chronic pain                                              | 191,442 (2.5%)    | 1,007 | 52.6  | 1.28 | (1.21 to 1.36) | 2 |
| Corticosteroids                                           | 935,246 (12.2%)   | 2,588 | 27.7  | 1.62 | (1.55 to 1.68) | 5 |
| Individuals without any of the 29 conditions above listed | 4,600,012 (60.1%) | 1,350 | 2.9   | -    | -              | - |

HIV, Human immunodeficiency virus; COPD, Chronic obstructive pulmonary disease

The analysis was based on the cohort of 7,655,502 beneficiaries of the Lombardy Region Health Service for at least two years, who on February 21, 2020 were alive, aged between 18 and 79 years and did not reside in a nursing home. During the first epidemic wave (until June 2020), this cohort experienced 9,160 severe (ICU admitted and mechanically ventilated via intubation) and / or fatal outcomes. The average incidence rate during the first wave was therefore 12.0 cases per 10,000 people at risk

† Odds ratio, and 90% confidence interval, estimated by multivariable logistic regression. Odds ratios measured the strength of the association between the presence/absence of each of the listed contributors and the outcome odds

‡ Weights were obtained from the coefficients of the logistic model; the latter were converted into scores by multiplying them by 10 and rounding them to the nearest whole number

## Legend of Figures

**Figure 1.** Relationship between categories of CoViD-19 Vulnerability Score and (i) the risk of occurrence of severe/fatal forms of Covid-19 (upper box), (ii) its distribution among NHS beneficiaries (bottom box). Columns indicate the observed values (of risk and prevalence respectively). Solid and dashed lines respectively represent the fitted cubic spline with the corresponding 5<sup>th</sup> and 95<sup>th</sup> percentiles

**Footnote.** The analysis was based on the cohort of 7,655,502 beneficiaries of the Lombardy Region Health Service for at least two years, who on February 21, 2020 were alive, aged between 18 and 79 years and did not reside in a nursing home. During the first epidemic wave (until June 2020), this cohort experienced 9,160 severe (ICU admitted and mechanically ventilated via intubation) and / or fatal outcomes. The average incidence rate during the first wave was therefore 12.0 cases per 10,000 people at risk.

**Figure 2.** Receiver Operating Characteristics (ROC) curves comparing discriminant power (i) of CoViD-19 Vulnerability Score (CVS), Charlson Comorbidity Index (CCI) and Multisource Comorbidity Score (MCS) from the derivation set (left box); (ii) of CoViD-19 Vulnerability Score (CVS) from several validation sets (right box)

**Footnote.** Derivation set (left box) was based on the cohort of 7,655,502 beneficiaries of the Lombardy Region Health Service for at least two years, who on February 21, 2020 were alive, aged between 18 and 79 years and did not reside in a nursing home. During the first epidemic wave (until June 2020), this cohort experienced 9,160 severe (ICU admitted and mechanically ventilated via intubation) and / or fatal outcomes. Validation sets (right box) were based on: (i) 7,575,924 resident in Lombardy whom observation started on July 1, 2020 and who experienced 2,822 severe/fatal outcomes within December 31, 2020; (ii) 92,267, 1,110,570, 3,012,754 and 3,649,518 beneficiaries of Valle d'Aosta, Marche, Puglia and Sicily regional health services, whom observation started on March 1, 2020 and who respectively experienced 173, 542, 1,953 and 1,541 severe/fatal outcomes within December 31, 2020

**Figure 3.** Calibration plot of observed (X-axis) vs predicted (Y-axis) risk of severe/fatal outcomes

**Footnote.** The analysis was based on the pooled validation sets of 15,441,033 from Lombardy, Valle d'Aosta, Marche, Puglia and Sicily who experienced 7,031 severe/fatal outcomes from starting (July 1, 2020 in Lombardy, or March 1, 2020 in the other regions) until December 31, 2020

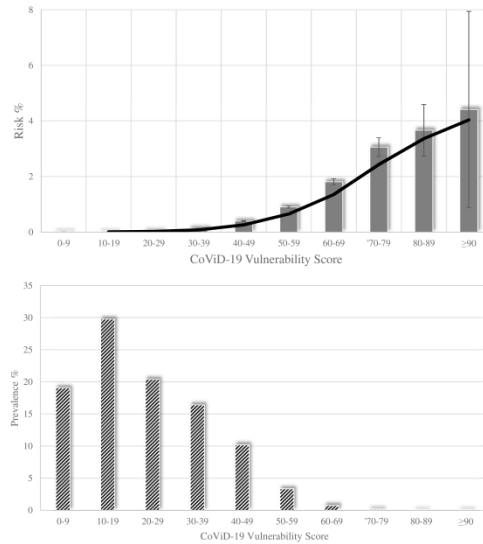

Relationship between categories of CoVID-19 Vulnerability Score and (i) the risk of occurrence of severe/fatal forms of Covid-19 (upper box), (ii) its distribution among NHS beneficiaries (bottom box). Columns indicate the observed values (of risk and prevalence respectively). Solid and dashed lines respectively represent the fitted cubic spline with the corresponding 5th and 95th percentiles

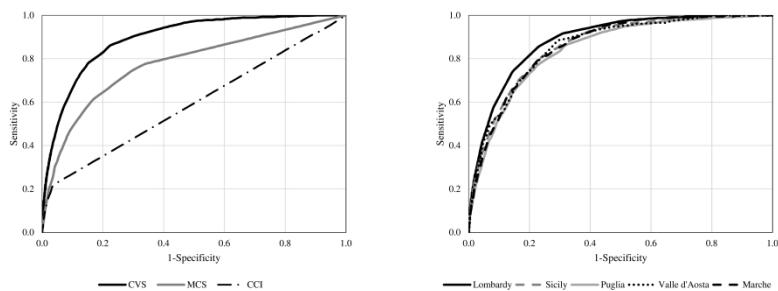

Receiver Operating Characteristics (ROC) curves comparing discriminant power (i) of CoViD-19 Vulnerability Score (CVS), Charlson Comorbidity Index (CCI) and Multisource Comorbidity Score (MCS) from the derivation set (left box); (ii) of CoViD-19 Vulnerability Score (CVS) from several validation sets (right box)

1  
2  
3  
4  
5  
6  
7  
8  
9  
10  
11  
12  
13  
14  
15  
16  
17  
18  
19  
20  
21  
22  
23  
24  
25  
26  
27  
28  
29  
30  
31  
32  
33  
34  
35  
36  
37  
38  
39  
40  
41  
42  
43  
44  
45  
46  
47  
48  
49  
50  
51  
52  
53  
54  
55  
56  
57  
58  
59  
60

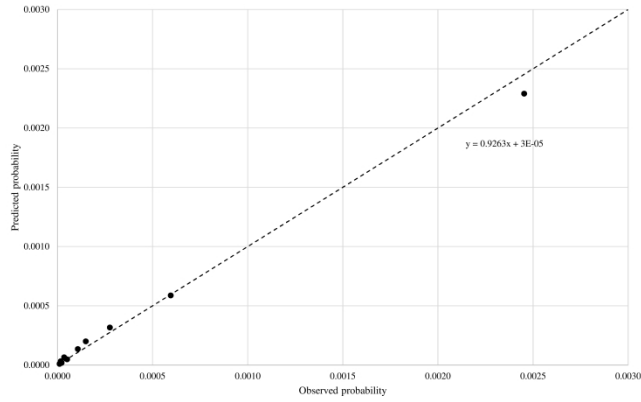

Calibration plot of observed (X-axis) vs predicted (Y-axis) risk of severe/fatal outcomes

1  
2  
3  
4 **Addressing vaccination priority by stratifying general population according**  
5  
6  
7 **with frailty: the new Covid-19 vulnerability score (CVS)**  
8  
9

10  
11 Giovanni Corrao, PhD<sup>1,2</sup>, Federico Rea, PhD<sup>1,2</sup>, Flavia Carle, PhD<sup>1,3</sup>, Salvatore Scondotto, PhD<sup>1,4</sup>,  
12  
13 Alessandra Allotta, MSc<sup>4</sup>, Vito Lepore, MD<sup>5</sup>, Antonio D’Ettorre, MSc<sup>5</sup>, Cinzia Tanzarella, MSc<sup>5</sup>,  
14  
15 Patrizia Vittori, MSc<sup>6</sup>, Sabrina Abena, MSc<sup>6</sup>, Marica Iommi, PhD<sup>3</sup>, Liana Spazzafumo, MSc<sup>1,7</sup>,  
16  
17 Michele Ercolanoni, MSc<sup>8,9</sup>, Roberto Blaco, MSc<sup>9</sup>, Simona Carbone, MSc<sup>10</sup>, Cristina Giordani,  
18  
19 MSc<sup>10</sup>, Dario Manfellotto, MD<sup>11</sup>, Massimo Galli, MD<sup>12,13</sup>, Giuseppe Mancina, MD<sup>14,15</sup> on behalf of  
20  
21 the “Monitoring and Assessing care Pathways (MAP)” working group of the Italian Ministry of  
22  
23 Health  
24  
25  
26  
27  
28  
29

30 <sup>1</sup> National Centre for Healthcare Research and Pharmacoepidemiology, University of Milano-  
31 Bicocca, Milan, Italy

32 <sup>2</sup> Unit of Biostatistics, Epidemiology and Public Health, Department of Statistics and Quantitative  
33 Methods, University of Milano-Bicocca, Milan, Italy

34 <sup>3</sup> Center of Epidemiology and Biostatistics, Polytechnic University of Marche, Ancona, Italy

35 <sup>4</sup> Department of Health Services and Epidemiological Observatory, Regional Health Authority,  
36 Sicily Region, Palermo, Italy

37 <sup>5</sup> Regional Health Agency of Puglia (Agenzia regionale socio-sanitaria), Bari, Italy

38 <sup>6</sup> Regional Unit of Epidemiology and Social Policies, Regional Health Authority, Valle D’Aosta  
39 Region, Aosta, Italy

40 <sup>7</sup> Regional Health Agency of Marche, Ancona, Italy

41 <sup>8</sup> ARIA S.p.a., Milan, Italy

42 <sup>9</sup> Epidemiologic Observatory, Regional Welfare Service, Lombardy Region, Milan, Italy

43 <sup>10</sup> Department of Health Planning, Italian Health Ministry, Rome, Italy

44 <sup>11</sup> Department of Internal Medicine, Hospital Fatebenefratelli - AFaR, Isola Tiberina, Rome, Italy

45 <sup>12</sup> Infectious Diseases Unit, Luigi Sacco Hospital, Milan, Italy

46 <sup>13</sup> Department of Biomedical and Clinical Sciences, University of Milan, Milan, Italy

47 <sup>14</sup> Emeritus Professor, University of Milano-Bicocca, Milan, Italy

48 <sup>15</sup> Policlinico di Monza, Monza, Italy  
49  
50  
51  
52  
53

54 **SUPPLEMENTARY MATERIAL**  
55  
56  
57  
58  
59  
60



**Supplementary Table S1.** Selected features of regional populations included into the validation study in comparison with entire Italian population

| Region        | Location       | Italian 2020 population census† |                 | Indicators of Covid-19 Epidemic Spread<br>(March-December 2020)‡ |        |
|---------------|----------------|---------------------------------|-----------------|------------------------------------------------------------------|--------|
|               |                | Whole population                | Population aged | Ascertained cases                                                | Deaths |
|               |                |                                 | 18 – 79 years   |                                                                  |        |
| Lombardy      | Norther Italy  | 10,027,602                      | 7,663,864       | 478,903                                                          | 25,123 |
| Valle d’Aoste | North Italy    | 125,034                         | 95,914          | 7,273                                                            | 379    |
| Marche        | Central Italy  | 1,512,672                       | 1,150,809       | 41,624                                                           | 1,571  |
| Puglia        | Southern Italy | 3,953,305                       | 3,055,720       | 90,964                                                           | 2,472  |
| Sicily        | Island         | 4,875,290                       | 3,744,848       | 93,644                                                           | 2,412  |
|               | Total          | 20,493,903                      | 15,711,155      | 712,408                                                          | 31,957 |
|               | Italy          | 59,641,488                      | 45,788,626      | 2,107,166                                                        | 74,159 |

† source: <http://demo.istat.it/popres/index.php?anno=2020&lingua=ita>

‡ source: Protezione Civile. Dati COVID-19 Italia (available at <https://github.com/pcm-dpc/COVID-19>)

**Supplementary Table S2.** List of candidate conditions for predicting the risk of experiencing severe fatal forms of COVID-19 infection

| Diagnostic categories                                                 | #                                              | Disease / condition                                                    | ICD-9 CM                                                                                                                                                                         | ATC                                                                                                                    |                            |
|-----------------------------------------------------------------------|------------------------------------------------|------------------------------------------------------------------------|----------------------------------------------------------------------------------------------------------------------------------------------------------------------------------|------------------------------------------------------------------------------------------------------------------------|----------------------------|
| Infectious and parasitic diseases                                     | 1                                              | HIV infection                                                          | 042.x, V08                                                                                                                                                                       | J05AB14, J05AE, J05AF01, J05AF02, J05AF04, J05AF05, J05AF06, J05AF09, J05AG, J05AR, J05AX07, J05AX08, J05AX09, J05AX12 |                            |
|                                                                       | 2                                              | Tuberculosis and Other infectious and parasitic diseases               | 010.x - 018.x, 001.x-009.x, 020.x-027.x, 030.x-041.x, 045.x-057.x, 060.x-066.x, 070.x-088.x, 090.x-104.x, 110.x-118.x, 120.x-139.x                                               | J04AB                                                                                                                  |                            |
| Neoplasms                                                             | 3                                              | Solid malignancies and Neoplasm of lymphatic and haematopoietic tissue | 140.x-165.x, 170.x-176.x, 179.x-199.x, V58.0, 92.2, 200.x-208.x                                                                                                                  | L01, L03AC, L02BA01, L02BA02, L02BG02, L02BG03, L02BG04, L02BG06, L02BB01, L02BB03, L02AE02, L02AE04, L02AB01          |                            |
|                                                                       | 4                                              | Benign neoplasm and carcinoma in situ                                  | 210.x-234.x                                                                                                                                                                      |                                                                                                                        |                            |
| Endocrine, nutritional and metabolic diseases, and immunity disorders | 5                                              | Hypothyroidism                                                         | 243, 244.x                                                                                                                                                                       | H03A, H03B                                                                                                             |                            |
|                                                                       | 6                                              | Hyper e hypoparathyroidism                                             | 252.0, 252.1                                                                                                                                                                     |                                                                                                                        |                            |
|                                                                       | 7                                              | Diabetes without insulin therapy                                       | 250.x, 348.0x, 357.2, 362.0, 366.41                                                                                                                                              | A10B                                                                                                                   |                            |
|                                                                       | 8                                              | Insulin therapy                                                        |                                                                                                                                                                                  | A10A                                                                                                                   |                            |
|                                                                       | 9                                              | Dyslipidaemia                                                          | 272.2, 272.4                                                                                                                                                                     | C10                                                                                                                    |                            |
|                                                                       | 10                                             | Obesity                                                                | 278.0x                                                                                                                                                                           |                                                                                                                        |                            |
|                                                                       | 11                                             | Weight loss                                                            | 260-263.x                                                                                                                                                                        |                                                                                                                        |                            |
|                                                                       | 12                                             | Disorders of fluid, electrolyte, and acid-base balance                 | 276.x                                                                                                                                                                            |                                                                                                                        |                            |
|                                                                       | 13                                             | Gout                                                                   | 274.x                                                                                                                                                                            | M04AC01, M04AA, M04AB                                                                                                  |                            |
|                                                                       | 14                                             | Other disorders of endocrine, nutritional and metabolic diseases       | 240.x-242.x, 245.x, 246.x, 249.x, 251.x, 252.8, 252.9, 253.x-259.x, 264.x-269.x, 270.x, 271.x, 272.0, 272.1, 272.3, 272.5-272.9, 273.x, 275.x, 277.x, 278.1-278.8 (except 277.0) |                                                                                                                        |                            |
|                                                                       | 15                                             | Disorders involving the immune mechanisms                              | 279.x                                                                                                                                                                            |                                                                                                                        |                            |
|                                                                       | Diseases of the blood and blood-forming organs | 16                                                                     | Coagulation defects                                                                                                                                                              | 286.x                                                                                                                  | B02B                       |
|                                                                       |                                                | 17                                                                     | Autoimmune haemolytic anaemias, Other anaemias, Anaemias only tracked from drug therapy                                                                                          | 280.x-282.x, 283.1-283.9, 284.x-285.x                                                                                  | B03A, B03B, B03XA01, L03AA |
|                                                                       |                                                | 18                                                                     | Other diseases of the blood and blood-forming organs                                                                                                                             | 287.x-289.x                                                                                                            |                            |
| Mental disorders                                                      | 19                                             | Dementia / Alzheimer                                                   | 290.0-290.4x, 331.0x                                                                                                                                                             | N06DA, N06DX01                                                                                                         |                            |

|                                                 |    |                                                       |                                                                                                                                                                                                                                              |                                                                                                                                            |
|-------------------------------------------------|----|-------------------------------------------------------|----------------------------------------------------------------------------------------------------------------------------------------------------------------------------------------------------------------------------------------------|--------------------------------------------------------------------------------------------------------------------------------------------|
|                                                 | 20 | Psychosis                                             | 295.x, 297.x, 298.2-298.9, 299.1x                                                                                                                                                                                                            | N05AD, N05AA, N05AB, N05AC, N05AX, N05AE, N05AF, N05AG, N05AH, N05AL                                                                       |
|                                                 | 21 | Depression                                            | 296.2, 296.3, 296.82, 298.0, 300.4, 301.12, 309.0x, 309.1x, 311.x                                                                                                                                                                            | N06A                                                                                                                                       |
|                                                 | 22 | Bipolar disorders                                     | 296.0x, 296.1x, 296.4x, 296.5x, 296.6x, 296.7x, 296.80, 296.81, 296.89, 296.9x, 298.1x                                                                                                                                                       | N05AN                                                                                                                                      |
|                                                 | 23 | Alcohol abuse                                         | 291.1, 291.2, 291.5, 291.8x, 291.9, 303.9, 305.0x, V11.3x                                                                                                                                                                                    | N07BB01                                                                                                                                    |
|                                                 | 24 | Drug addiction                                        | 292.0x, 292.82-292.89, 292.9x, 304.x, 305.2x-305.9x                                                                                                                                                                                          | N07BB04                                                                                                                                    |
|                                                 | 25 | Anxiety                                               | 300.0x                                                                                                                                                                                                                                       | N05BA, N05BB01, N05CD, N05BC01, N05BC51, N05BX, N05CF, N05CX01, N06BX                                                                      |
|                                                 | 26 | Other mental disorders                                | 290.8, 290.9, 291.0, 291.3, 291.4, 292.1x, 292.2, 292.81, 293.x, 294.x, 299.0x, 299.8x, 299.9x, 300.0x-300.2x, 300.3, 300.5-300.9, 301.0, 301.10, 301.11, 301.2x-301.9x, 302.x, 303.x, 305.1, 306.x-308.x, 309.2x-309.4x, 310.x, 312.x-319.x |                                                                                                                                            |
| Diseases of the nervous system and sense organs | 27 | Parkinson's disease and parkinsonism                  | 332.x                                                                                                                                                                                                                                        | N04                                                                                                                                        |
|                                                 | 28 | Multiple sclerosis                                    | 340                                                                                                                                                                                                                                          | L03AB07, L03AB08, L04AA23, L04AA27, L03AX13, L04AA31, L04AA34, L03AB13, L04AX07                                                            |
|                                                 | 29 | Epilepsy and recurrent seizures                       | 345.x                                                                                                                                                                                                                                        | N03AF01, N03AB02, N03AA02, N03AA03, N03AA04, N03AE01, N03AD01, N03AG01, N05BA09, N03AG04, N03AX10, N03AG06, N03AF02, N03AX14, N03AX15 S01E |
|                                                 | 30 | Glaucoma                                              | 365.x                                                                                                                                                                                                                                        |                                                                                                                                            |
|                                                 | 31 | Disorders of the eye and adnexa                       | 360.x-379.x (except 365.x)                                                                                                                                                                                                                   |                                                                                                                                            |
|                                                 | 32 | Diseases of the ear and mastoid process               | 380.x-389.x                                                                                                                                                                                                                                  |                                                                                                                                            |
|                                                 | 33 | Other diseases of the nervous system and sense organs | 320.x-326.x, 330.x-331.x, 333.x-337.x, 340.x-344.x, 346.x-359.x                                                                                                                                                                              |                                                                                                                                            |
| Diseases of the circulatory system              | 34 | Ischaemic Heart Disease/Angina                        | 410.x – 414                                                                                                                                                                                                                                  | C01DA, C01DX                                                                                                                               |
|                                                 | 35 | Heart failure                                         | 398.91, 402.11, 402.91, 404.11, 404.13, 404.91, 404.93, 428.x                                                                                                                                                                                |                                                                                                                                            |
|                                                 | 36 | Arrhythmia                                            | 426.10, 426.11, 426.13, 426.20-426.53, 426.60-426.89, 427.0, 427.2,                                                                                                                                                                          | C01BA, C01BC, C01BD                                                                                                                        |

|                                    |    |                                                                                                           |                                                                                                                                                                                                                                                                                                                                                                                                                                                                                                                                             |
|------------------------------------|----|-----------------------------------------------------------------------------------------------------------|---------------------------------------------------------------------------------------------------------------------------------------------------------------------------------------------------------------------------------------------------------------------------------------------------------------------------------------------------------------------------------------------------------------------------------------------------------------------------------------------------------------------------------------------|
|                                    |    | 427.31, 427.60, 427.9, 785.0x, V45.0x, V53.3x                                                             |                                                                                                                                                                                                                                                                                                                                                                                                                                                                                                                                             |
|                                    | 37 | Valvular diseases                                                                                         | 093.20-093.24, 394.0x-397.1x, 424.00-424.91, 746.3x-746.6x, V42.2x, V43.3x                                                                                                                                                                                                                                                                                                                                                                                                                                                                  |
|                                    | 38 | Vascular diseases                                                                                         | 440.x, 441.2, 441.4, 441.7, 441.9, 443.1x-443.9x, 447.1, 557.1x, 557.9x, 785.4x, V43.4x                                                                                                                                                                                                                                                                                                                                                                                                                                                     |
|                                    | 39 | Cerebrovascular diseases                                                                                  | 430.x-438.x                                                                                                                                                                                                                                                                                                                                                                                                                                                                                                                                 |
|                                    | 40 | Hypertension                                                                                              | 401.x-405.x                                                                                                                                                                                                                                                                                                                                                                                                                                                                                                                                 |
|                                    |    |                                                                                                           | C03AA, C03AB, C03AH, C03AX01, C02CA04, C03BA02, C03BA03, C03BA04, C03BA05, C03BA07, C03BA08, C03BA09, C03BA10, C03BA11, C03DB01, C03DB02, C03EA, C09BA02, C09BA03, C09BA04, C09BA05, C09BA06, C09BA07, C09BA08, C09BA09, C09BB, C09DB, C09DA01, C09DA02, C09DA03, C09DA04, C09DA06, C09DA07, C09DA08, C02AB01, C02AB02, C02AC01, C02AC02, C02AC04, C02AC05, C02DB02, C02DB03, C02DB04, C02DC01, C02DD01, C02DG01, C02KA01, C02KB01, C02KC01, C02KD01, C02KX01, C09XA B01AB, B01AX01, B01AD10, B01AD12, C04AD03, B01AC05 B01AA, B01AE, B01AF |
|                                    | 41 | Coronary and peripheral vascular disease                                                                  |                                                                                                                                                                                                                                                                                                                                                                                                                                                                                                                                             |
|                                    | 42 | Oral anticoagulant agents                                                                                 |                                                                                                                                                                                                                                                                                                                                                                                                                                                                                                                                             |
|                                    | 43 | Other diseases of the circulatory system                                                                  | 390.x-392.x, 393, 397.9, 398.90, 398.99, 411.8x, 412.x-417x, 420.x-423.x, 424.99, 425.x, 426.0, 426.12, 426.54, 426.9, 427.1, 427.32, 427.4x, 427.5, 427.61, 427.69, 427.8x, 429.x, 441.0x, 441.1, 441.3, 441.5, 441.6, 442.x, 443.0, 444.x-446.x, 447.0, 447.2-447.9, 448.x 451.x-459.x                                                                                                                                                                                                                                                    |
| Diseases of the respiratory system | 44 | Chronic Obstructive Pulmonary Disease, Asthma, Chronic respiratory disease only tracked from drug therapy | 490-492.x, 493.x, 494.x, 496 R03AA, R03AB, R03AC, R03DA, R03DB, R03DA20, R01AC01, R03BC01, R01AC51, S01GX01, S01GX51, R03BA                                                                                                                                                                                                                                                                                                                                                                                                                 |

|                                                              |    |                                                                                                                                            |                                                                                       |                                                                                                                                                                                             |
|--------------------------------------------------------------|----|--------------------------------------------------------------------------------------------------------------------------------------------|---------------------------------------------------------------------------------------|---------------------------------------------------------------------------------------------------------------------------------------------------------------------------------------------|
|                                                              | 45 | Acute respiratory infections                                                                                                               | 460-466.x                                                                             |                                                                                                                                                                                             |
|                                                              | 46 | Cystic Fibrosis                                                                                                                            | 277.0                                                                                 | R05CB, R05FB01, R05FA01, A09AA02, R07AX02, R07AX30, R07AX31                                                                                                                                 |
|                                                              | 47 | Other diseases of the respiratory system                                                                                                   | 470.x-478.x, 480.x-487.x, 495.x, 500.x-508.x, 510.x-519.x                             |                                                                                                                                                                                             |
| Diseases of the digestive system                             | 48 | Liver cirrhosis and other liver chronic diseases                                                                                           | 571.x, 573.x                                                                          | J05AP08, J05AP09, J05AP51, J05AP53, J05AP54, J05AP55, J05AP56, J05AP57, B05AA01                                                                                                             |
|                                                              | 49 | Inflammatory bowel diseases (Ulcerative colitis and Chron's disease)                                                                       | 555.x-556.x                                                                           | A07EC01, A07EC02, A07EC03, A07EC04                                                                                                                                                          |
|                                                              | 50 | Chronic and acute pancreatitis                                                                                                             | 577.0-577.1                                                                           |                                                                                                                                                                                             |
|                                                              | 51 | Other diseases of the digestive system                                                                                                     | 520.x-553.x, 557.x-570, 572.x, 574.x-576.x, 577.2-577.9, 578.x, 579.x                 |                                                                                                                                                                                             |
| Diseases of the genitourinary system                         | 52 | Chronic kidney disease                                                                                                                     | 585, V45.1, V56.x, V03AE                                                              |                                                                                                                                                                                             |
|                                                              | 53 | Other kidney disorders                                                                                                                     | 580.x-584.x, 586, 587, 588.x-589.x                                                    |                                                                                                                                                                                             |
|                                                              | 54 | Other diseases of the genitourinary system                                                                                                 | 590.x-608.x, 610.x, 611.x, 614.x-629.x                                                |                                                                                                                                                                                             |
| Diseases of the skin and subcutaneous tissues                | 55 | Diseases of the skin and subcutaneous tissues, including No rheumatoid psoriasis                                                           | 680.x-686.x, 690.x-695.x, 696.0, 696.2-696.5, 696.8, 697.x, 698.x, 700.x-709.x, 696.1 | D05BB01, D05BB02, D05AX                                                                                                                                                                     |
| Diseases of the musculoskeletal system and connective tissue | 56 | Autoimmune disease (Rheumatoid arthritis, Rheumatoid psoriasis, Anchylosing spondylitis, Systemic sclerosis, Systemic lupus erythematosus) | 714.0, 696.0, 720.0, 710.1x, 710.0x                                                   |                                                                                                                                                                                             |
|                                                              | 57 | Other diseases of the musculoskeletal system and connective tissue                                                                         | 710.2-710.9, 711.x-713.x, 714.1x, 714.9x, 715.x-719.x, 720.1x-720.9x, 721.x-739.x     |                                                                                                                                                                                             |
| Symptoms, signs and ill-defined conditions                   | 58 | Symptoms, signs and ill-defined conditions                                                                                                 | 780-799                                                                               |                                                                                                                                                                                             |
| Other conditions                                             | 59 | Transplantation                                                                                                                            | V42                                                                                   | L04AA01, L04AA02, L04AA03, L04AA04, L04AA05, L04AA06, L04AA08, L04AA09, L04AA10, L04AA11, L04AA12, L04AA14, L04AA15, L04AA16, L04AA17, L04AA18, L04AA19, L04AA21, L04AD01, L04AD02, L04AX01 |

|    |    |                 |                            |
|----|----|-----------------|----------------------------|
| 1  |    |                 |                            |
| 2  | 60 | Chronic pain    | 338.2, 338.4               |
| 3  |    |                 | N02AA01, N02AG01, N02AE01, |
| 4  |    |                 | N02AB03, N02AA05, N02AA55, |
| 5  | 61 | Corticosteroids | N02AA03, N02AX06           |
| 6  |    |                 | H02                        |
| 7  |    |                 |                            |
| 8  |    |                 |                            |
| 9  |    |                 |                            |
| 10 |    |                 |                            |
| 11 |    |                 |                            |
| 12 |    |                 |                            |
| 13 |    |                 |                            |
| 14 |    |                 |                            |
| 15 |    |                 |                            |
| 16 |    |                 |                            |
| 17 |    |                 |                            |
| 18 |    |                 |                            |
| 19 |    |                 |                            |
| 20 |    |                 |                            |
| 21 |    |                 |                            |
| 22 |    |                 |                            |
| 23 |    |                 |                            |
| 24 |    |                 |                            |
| 25 |    |                 |                            |
| 26 |    |                 |                            |
| 27 |    |                 |                            |
| 28 |    |                 |                            |
| 29 |    |                 |                            |
| 30 |    |                 |                            |
| 31 |    |                 |                            |
| 32 |    |                 |                            |
| 33 |    |                 |                            |
| 34 |    |                 |                            |
| 35 |    |                 |                            |
| 36 |    |                 |                            |
| 37 |    |                 |                            |
| 38 |    |                 |                            |
| 39 |    |                 |                            |
| 40 |    |                 |                            |
| 41 |    |                 |                            |
| 42 |    |                 |                            |
| 43 |    |                 |                            |
| 44 |    |                 |                            |
| 45 |    |                 |                            |
| 46 |    |                 |                            |

For peer review only

**The RECORD statement – checklist of items, extended from the STROBE statement, that should be reported in observational studies using routinely collected health data.**

|                           | Item No. | STROBE items                                                                                                                                                                               | Location in manuscript where items are reported | RECORD items                                                                                                                                                                                                                                                                                                                                                                                                                                | Location in manuscript where items are reported |
|---------------------------|----------|--------------------------------------------------------------------------------------------------------------------------------------------------------------------------------------------|-------------------------------------------------|---------------------------------------------------------------------------------------------------------------------------------------------------------------------------------------------------------------------------------------------------------------------------------------------------------------------------------------------------------------------------------------------------------------------------------------------|-------------------------------------------------|
| <b>Title and abstract</b> |          |                                                                                                                                                                                            |                                                 |                                                                                                                                                                                                                                                                                                                                                                                                                                             |                                                 |
|                           | 1        | (a) Indicate the study's design with a commonly used term in the title or the abstract (b) Provide in the abstract an informative and balanced summary of what was done and what was found |                                                 | RECORD 1.1: The type of data used should be specified in the title or abstract. When possible, the name of the databases used should be included.<br><br>RECORD 1.2: If applicable, the geographic region and timeframe within which the study took place should be reported in the title or abstract.<br><br>RECORD 1.3: If linkage between databases was conducted for the study, this should be clearly stated in the title or abstract. | Page 1-5                                        |
| <b>Introduction</b>       |          |                                                                                                                                                                                            |                                                 |                                                                                                                                                                                                                                                                                                                                                                                                                                             |                                                 |
| Background rationale      | 2        | Explain the scientific background and rationale for the investigation being reported                                                                                                       |                                                 |                                                                                                                                                                                                                                                                                                                                                                                                                                             | 7                                               |
| Objectives                | 3        | State specific objectives, including any prespecified hypotheses                                                                                                                           |                                                 |                                                                                                                                                                                                                                                                                                                                                                                                                                             | 8                                               |
| <b>Methods</b>            |          |                                                                                                                                                                                            |                                                 |                                                                                                                                                                                                                                                                                                                                                                                                                                             |                                                 |
| Study Design              | 4        | Present key elements of study design early in the paper                                                                                                                                    |                                                 |                                                                                                                                                                                                                                                                                                                                                                                                                                             | 9-11                                            |
| Setting                   | 5        | Describe the setting, locations, and relevant dates, including periods of recruitment, exposure, follow-up, and data collection                                                            |                                                 |                                                                                                                                                                                                                                                                                                                                                                                                                                             | 8                                               |

|                              |   |                                                                                                                                                                                                                                                                                                                                                                                                                                                                                                                                                                                                                                                                                                                              |  |                                                                                                                                                                                                                                                                                                                                                                                                                                                                                                                                                                                                                                                                                                      |      |
|------------------------------|---|------------------------------------------------------------------------------------------------------------------------------------------------------------------------------------------------------------------------------------------------------------------------------------------------------------------------------------------------------------------------------------------------------------------------------------------------------------------------------------------------------------------------------------------------------------------------------------------------------------------------------------------------------------------------------------------------------------------------------|--|------------------------------------------------------------------------------------------------------------------------------------------------------------------------------------------------------------------------------------------------------------------------------------------------------------------------------------------------------------------------------------------------------------------------------------------------------------------------------------------------------------------------------------------------------------------------------------------------------------------------------------------------------------------------------------------------------|------|
| Participants                 | 6 | <p>(a) <i>Cohort study</i> - Give the eligibility criteria, and the sources and methods of selection of participants. Describe methods of follow-up</p> <p><i>Case-control study</i> - Give the eligibility criteria, and the sources and methods of case ascertainment and control selection. Give the rationale for the choice of cases and controls</p> <p><i>Cross-sectional study</i> - Give the eligibility criteria, and the sources and methods of selection of participants</p> <p>(b) <i>Cohort study</i> - For matched studies, give matching criteria and number of exposed and unexposed</p> <p><i>Case-control study</i> - For matched studies, give matching criteria and the number of controls per case</p> |  | <p>RECORD 6.1: The methods of study population selection (such as codes or algorithms used to identify subjects) should be listed in detail. If this is not possible, an explanation should be provided.</p> <p>RECORD 6.2: Any validation studies of the codes or algorithms used to select the population should be referenced. If validation was conducted for this study and not published elsewhere, detailed methods and results should be provided.</p> <p>RECORD 6.3: If the study involved linkage of databases, consider use of a flow diagram or other graphical display to demonstrate the data linkage process, including the number of individuals with linked data at each stage.</p> | 8-11 |
| Variables                    | 7 | Clearly define all outcomes, exposures, predictors, potential confounders, and effect modifiers. Give diagnostic criteria, if applicable.                                                                                                                                                                                                                                                                                                                                                                                                                                                                                                                                                                                    |  | RECORD 7.1: A complete list of codes and algorithms used to classify exposures, outcomes, confounders, and effect modifiers should be provided. If these cannot be reported, an explanation should be provided.                                                                                                                                                                                                                                                                                                                                                                                                                                                                                      | 9    |
| Data sources/<br>measurement | 8 | For each variable of interest, give sources of data and details of methods of assessment (measurement). Describe comparability of assessment methods if there is more than one group                                                                                                                                                                                                                                                                                                                                                                                                                                                                                                                                         |  |                                                                                                                                                                                                                                                                                                                                                                                                                                                                                                                                                                                                                                                                                                      | 9    |



|                                                                                                                                                    |                                  |    |                                                                                                                                                                                                                                                                                                                                                                                                                                                                                                                                                                      |                                                                                                                                                       |      |
|----------------------------------------------------------------------------------------------------------------------------------------------------|----------------------------------|----|----------------------------------------------------------------------------------------------------------------------------------------------------------------------------------------------------------------------------------------------------------------------------------------------------------------------------------------------------------------------------------------------------------------------------------------------------------------------------------------------------------------------------------------------------------------------|-------------------------------------------------------------------------------------------------------------------------------------------------------|------|
| 1<br>2<br>3<br>4                                                                                                                                   | Bias                             | 9  | Describe any efforts to address potential sources of bias                                                                                                                                                                                                                                                                                                                                                                                                                                                                                                            |                                                                                                                                                       | 9-11 |
| 5<br>6<br>7<br>8<br>9                                                                                                                              | Study size                       | 10 | Explain how the study size was arrived at                                                                                                                                                                                                                                                                                                                                                                                                                                                                                                                            |                                                                                                                                                       | 8-11 |
| 10<br>11<br>12<br>13<br>14<br>15<br>16<br>17<br>18<br>19<br>20<br>21<br>22<br>23<br>24<br>25<br>26<br>27<br>28<br>29<br>30<br>31<br>32<br>33<br>34 | Quantitative variables           | 11 | Explain how quantitative variables were handled in the analyses. If applicable, describe which groupings were chosen, and why                                                                                                                                                                                                                                                                                                                                                                                                                                        |                                                                                                                                                       | 9,10 |
| 35<br>36<br>37<br>38<br>39<br>40<br>41<br>42<br>43<br>44<br>45<br>46<br>47                                                                         | Statistical methods              | 12 | (a) Describe all statistical methods, including those used to control for confounding<br>(b) Describe any methods used to examine subgroups and interactions<br>(c) Explain how missing data were addressed<br>(d) <i>Cohort study</i> - If applicable, explain how loss to follow-up was addressed<br><i>Case-control study</i> - If applicable, explain how matching of cases and controls was addressed<br><i>Cross-sectional study</i> - If applicable, describe analytical methods taking account of sampling strategy<br>(e) Describe any sensitivity analyses |                                                                                                                                                       | 9-11 |
|                                                                                                                                                    | Data access and cleaning methods |    | ..                                                                                                                                                                                                                                                                                                                                                                                                                                                                                                                                                                   | RECORD 12.1: Authors should describe the extent to which the investigators had access to the database population used to create the study population. | 8-11 |

|                  |    |                                                                                                                                                                                                                                                                                                                                                 |  |                                                                                                                                                                                                                                                                                                                    |       |
|------------------|----|-------------------------------------------------------------------------------------------------------------------------------------------------------------------------------------------------------------------------------------------------------------------------------------------------------------------------------------------------|--|--------------------------------------------------------------------------------------------------------------------------------------------------------------------------------------------------------------------------------------------------------------------------------------------------------------------|-------|
|                  |    |                                                                                                                                                                                                                                                                                                                                                 |  | RECORD 12.2: Authors should provide information on the data cleaning methods used in the study.                                                                                                                                                                                                                    |       |
| Linkage          |    | ..                                                                                                                                                                                                                                                                                                                                              |  | RECORD 12.3: State whether the study included person-level, institutional-level, or other data linkage across two or more databases. The methods of linkage and methods of linkage quality evaluation should be provided.                                                                                          | 8,9   |
| <b>Results</b>   |    |                                                                                                                                                                                                                                                                                                                                                 |  |                                                                                                                                                                                                                                                                                                                    |       |
| Participants     | 13 | (a) Report the numbers of individuals at each stage of the study ( <i>e.g.</i> , numbers potentially eligible, examined for eligibility, confirmed eligible, included in the study, completing follow-up, and analysed)<br>(b) Give reasons for non-participation at each stage.<br>(c) Consider use of a flow diagram                          |  | RECORD 13.1: Describe in detail the selection of the persons included in the study ( <i>i.e.</i> , study population selection) including filtering based on data quality, data availability and linkage. The selection of included persons can be described in the text and/or by means of the study flow diagram. | 11,12 |
| Descriptive data | 14 | (a) Give characteristics of study participants ( <i>e.g.</i> , demographic, clinical, social) and information on exposures and potential confounders<br>(b) Indicate the number of participants with missing data for each variable of interest<br>(c) <i>Cohort study</i> - summarise follow-up time ( <i>e.g.</i> , average and total amount) |  |                                                                                                                                                                                                                                                                                                                    | 11,12 |
| Outcome data     | 15 | <i>Cohort study</i> - Report numbers of outcome events or summary measures over time<br><i>Case-control study</i> - Report numbers in each exposure                                                                                                                                                                                             |  |                                                                                                                                                                                                                                                                                                                    | 11,12 |

|                   |    |                                                                                                                                                                                                                                                                                                                                                                                                                 |  |                                                                                                                                                                                                                                                                                                          |       |
|-------------------|----|-----------------------------------------------------------------------------------------------------------------------------------------------------------------------------------------------------------------------------------------------------------------------------------------------------------------------------------------------------------------------------------------------------------------|--|----------------------------------------------------------------------------------------------------------------------------------------------------------------------------------------------------------------------------------------------------------------------------------------------------------|-------|
|                   |    | category, or summary measures of exposure<br><i>Cross-sectional study</i> - Report numbers of outcome events or summary measures                                                                                                                                                                                                                                                                                |  |                                                                                                                                                                                                                                                                                                          |       |
| Main results      | 16 | (a) Give unadjusted estimates and, if applicable, confounder-adjusted estimates and their precision (e.g., 95% confidence interval). Make clear which confounders were adjusted for and why they were included<br>(b) Report category boundaries when continuous variables were categorized<br>(c) If relevant, consider translating estimates of relative risk into absolute risk for a meaningful time period |  |                                                                                                                                                                                                                                                                                                          | 11,12 |
| Other analyses    | 17 | Report other analyses done—e.g., analyses of subgroups and interactions, and sensitivity analyses                                                                                                                                                                                                                                                                                                               |  |                                                                                                                                                                                                                                                                                                          | 11,12 |
| <b>Discussion</b> |    |                                                                                                                                                                                                                                                                                                                                                                                                                 |  |                                                                                                                                                                                                                                                                                                          |       |
| Key results       | 18 | Summarise key results with reference to study objectives                                                                                                                                                                                                                                                                                                                                                        |  |                                                                                                                                                                                                                                                                                                          | 12,13 |
| Limitations       | 19 | Discuss limitations of the study, taking into account sources of potential bias or imprecision. Discuss both direction and magnitude of any potential bias                                                                                                                                                                                                                                                      |  | RECORD 19.1: Discuss the implications of using data that were not created or collected to answer the specific research question(s). Include discussion of misclassification bias, unmeasured confounding, missing data, and changing eligibility over time, as they pertain to the study being reported. | 15,16 |
| Interpretation    | 20 | Give a cautious overall interpretation of results considering objectives,                                                                                                                                                                                                                                                                                                                                       |  |                                                                                                                                                                                                                                                                                                          | 13-15 |

|                                                           |    |                                                                                                                                                               |  |                                                                                                                                                          |    |
|-----------------------------------------------------------|----|---------------------------------------------------------------------------------------------------------------------------------------------------------------|--|----------------------------------------------------------------------------------------------------------------------------------------------------------|----|
|                                                           |    | limitations, multiplicity of analyses, results from similar studies, and other relevant evidence                                                              |  |                                                                                                                                                          |    |
| Generalisability                                          | 21 | Discuss the generalisability (external validity) of the study results                                                                                         |  |                                                                                                                                                          | 15 |
| <b>Other Information</b>                                  |    |                                                                                                                                                               |  |                                                                                                                                                          |    |
| Funding                                                   | 22 | Give the source of funding and the role of the funders for the present study and, if applicable, for the original study on which the present article is based |  |                                                                                                                                                          | 17 |
| Accessibility of protocol, raw data, and programming code |    | ..                                                                                                                                                            |  | RECORD 22.1: Authors should provide information on how to access any supplemental information such as the study protocol, raw data, or programming code. | 18 |

\*Reference: Benchimol EI, Smeeth L, Guttman A, Harron K, Moher D, Petersen I, Sørensen HT, von Elm E, Langan SM, the RECORD Working Committee. The REporting of studies Conducted using Observational Routinely-collected health Data (RECORD) Statement. *PLoS Medicine* 2015; in press.

\*Checklist is protected under Creative Commons Attribution ([CC BY](https://creativecommons.org/licenses/by/4.0/)) license.

# BMJ Open

## Addressing vaccination priority by stratifying general population according with frailty: a large population-based cohort study

|                                 |                                                                                                                                                                                                                                                                                                                                                                                                                                                                                                                                                                                                                                                                                                                                                                                                                                                                                                                                                                                                                                                                                                                                                                                                                                                                                                                                    |
|---------------------------------|------------------------------------------------------------------------------------------------------------------------------------------------------------------------------------------------------------------------------------------------------------------------------------------------------------------------------------------------------------------------------------------------------------------------------------------------------------------------------------------------------------------------------------------------------------------------------------------------------------------------------------------------------------------------------------------------------------------------------------------------------------------------------------------------------------------------------------------------------------------------------------------------------------------------------------------------------------------------------------------------------------------------------------------------------------------------------------------------------------------------------------------------------------------------------------------------------------------------------------------------------------------------------------------------------------------------------------|
| Journal:                        | <i>BMJ Open</i>                                                                                                                                                                                                                                                                                                                                                                                                                                                                                                                                                                                                                                                                                                                                                                                                                                                                                                                                                                                                                                                                                                                                                                                                                                                                                                                    |
| Manuscript ID                   | bmjopen-2021-053281.R1                                                                                                                                                                                                                                                                                                                                                                                                                                                                                                                                                                                                                                                                                                                                                                                                                                                                                                                                                                                                                                                                                                                                                                                                                                                                                                             |
| Article Type:                   | Original research                                                                                                                                                                                                                                                                                                                                                                                                                                                                                                                                                                                                                                                                                                                                                                                                                                                                                                                                                                                                                                                                                                                                                                                                                                                                                                                  |
| Date Submitted by the Author:   | 10-Oct-2021                                                                                                                                                                                                                                                                                                                                                                                                                                                                                                                                                                                                                                                                                                                                                                                                                                                                                                                                                                                                                                                                                                                                                                                                                                                                                                                        |
| Complete List of Authors:       | Corrao, Giovanni; Università degli Studi di Milano-Bicocca<br>Rea, Federico; University of Milan-Bicocca<br>Carle, Flavia; Polytechnic University of Marche<br>Scodotto, Salvatore; Department of Epidemiologic Observatory, Health Department of Sicily<br>Allotta, Alessandra; Regional Health Authority, Department of Health Services and Epidemiological Observatory<br>Lepore, Vito; Regional Health Agency of Puglia<br>D'Ettorre, Antonio; Regional Health Agency of Puglia<br>Tanzarella, Cinzia; Regional Health Agency of Puglia<br>Vittori, Patrizia; Regional Health Authority<br>Abena, Sabrina; Regional Health Authority<br>Iommi, Marica; Polytechnic University of Marche<br>Spazzafumo, Liana; Regional Health Agency of Marche<br>Ercolanoni, Michele; Regional Welfare Service<br>Blaco, Roberto; Regional Welfare Service<br>Carbone, Simona; Italian Health Ministry, Department of Health Planning<br>Giordani, Cristina; Italian Health Ministry, Department of Health Planning<br>Manfellotto, Dario; Hospital Fatebenefratelli - AFaR, Department of Internal Medicine<br>Galli, Massimo; University of Milan L. Sacco Hospital, Institute of Tropical and Infectious Diseases<br>Mancia, Giuseppe; University of Milano-Bicocca, Clinical Medicine and Prevention; Ospedale San Gerardo, Clinia Medica |
| <b>Primary Subject Heading</b>: | Public health                                                                                                                                                                                                                                                                                                                                                                                                                                                                                                                                                                                                                                                                                                                                                                                                                                                                                                                                                                                                                                                                                                                                                                                                                                                                                                                      |
| Secondary Subject Heading:      | Epidemiology, Health services research                                                                                                                                                                                                                                                                                                                                                                                                                                                                                                                                                                                                                                                                                                                                                                                                                                                                                                                                                                                                                                                                                                                                                                                                                                                                                             |
| Keywords:                       | COVID-19, Health policy < HEALTH SERVICES ADMINISTRATION & MANAGEMENT, PUBLIC HEALTH                                                                                                                                                                                                                                                                                                                                                                                                                                                                                                                                                                                                                                                                                                                                                                                                                                                                                                                                                                                                                                                                                                                                                                                                                                               |
|                                 |                                                                                                                                                                                                                                                                                                                                                                                                                                                                                                                                                                                                                                                                                                                                                                                                                                                                                                                                                                                                                                                                                                                                                                                                                                                                                                                                    |

SCHOLARONE™  
Manuscripts

1  
2  
3  
4  
5  
6  
7  
8  
9  
10  
11  
12  
13  
14  
15  
16  
17  
18  
19  
20  
21  
22  
23  
24  
25  
26  
27  
28  
29  
30  
31  
32  
33  
34  
35  
36  
37  
38  
39  
40  
41  
42  
43  
44  
45  
46  
47  
48  
49  
50  
51  
52  
53  
54  
55  
56  
57  
58  
59  
60



I, the Submitting Author has the right to grant and does grant on behalf of all authors of the Work (as defined in the below author licence), an exclusive licence and/or a non-exclusive licence for contributions from authors who are: i) UK Crown employees; ii) where BMJ has agreed a CC-BY licence shall apply, and/or iii) in accordance with the terms applicable for US Federal Government officers or employees acting as part of their official duties; on a worldwide, perpetual, irrevocable, royalty-free basis to BMJ Publishing Group Ltd ("BMJ") its licensees and where the relevant Journal is co-owned by BMJ to the co-owners of the Journal, to publish the Work in this journal and any other BMJ products and to exploit all rights, as set out in our [licence](#).

The Submitting Author accepts and understands that any supply made under these terms is made by BMJ to the Submitting Author unless you are acting as an employee on behalf of your employer or a postgraduate student of an affiliated institution which is paying any applicable article publishing charge ("APC") for Open Access articles. Where the Submitting Author wishes to make the Work available on an Open Access basis (and intends to pay the relevant APC), the terms of reuse of such Open Access shall be governed by a Creative Commons licence – details of these licences and which [Creative Commons](#) licence will apply to this Work are set out in our licence referred to above.

Other than as permitted in any relevant BMJ Author's Self Archiving Policies, I confirm this Work has not been accepted for publication elsewhere, is not being considered for publication elsewhere and does not duplicate material already published. I confirm all authors consent to publication of this Work and authorise the granting of this licence.

1  
2  
3  
4 **1 Addressing vaccination priority by stratifying general population according**  
5  
6  
7 **2 with frailty: a large population-based cohort study**  
8  
9  
10

11 3 Giovanni Corrao, PhD<sup>1,2</sup>, Federico Rea, PhD<sup>1,2</sup>, Flavia Carle, PhD<sup>1,3</sup>, Salvatore Sccondotto, PhD<sup>1,4</sup>,  
12  
13 4 Alessandra Allotta, MSc<sup>4</sup>, Vito Lepore, MD<sup>5</sup>, Antonio D’Ettorre, MSc<sup>5</sup>, Cinzia Tanzarella, MSc<sup>5</sup>,  
14  
15 5 Patrizia Vittori, MSc<sup>6</sup>, Sabrina Abena, MSc<sup>6</sup>, Marica Iommi, PhD<sup>3</sup>, Liana Spazzafumo, MSc<sup>1,7</sup>,  
16  
17 6 Michele Ercolanoni, MSc<sup>8,9</sup>, Roberto Blaco, MSc<sup>9</sup>, Simona Carbone, MSc<sup>10</sup>, Cristina Giordani,  
18  
19 7 MSc<sup>10</sup>, Dario Manfellotto, MD<sup>11</sup>, Massimo Galli, MD<sup>12,13</sup>, Giuseppe Mancina, MD<sup>14,15</sup> on behalf of  
20  
21 8 the “Monitoring and Assessing care Pathways (MAP)” working group of the Italian Ministry of  
22  
23 9 Health  
24  
25  
26  
27  
28  
29

30 10 <sup>1</sup> National Centre for Healthcare Research and Pharmacoepidemiology, University of Milano-  
31 11 Bicocca, Milan, Italy

32 12 <sup>2</sup> Unit of Biostatistics, Epidemiology and Public Health, Department of Statistics and Quantitative  
33 13 Methods, University of Milano-Bicocca, Milan, Italy

34 14 <sup>3</sup> Center of Epidemiology and Biostatistics, Polytechnic University of Marche, Ancona, Italy

35 15 <sup>4</sup> Department of Health Services and Epidemiological Observatory, Regional Health Authority,  
36 16 Sicily Region, Palermo, Italy

37 17 <sup>5</sup> Regional Health Agency of Puglia (Agenzia regionale socio-sanitaria), Bari, Italy

38 18 <sup>6</sup> Regional Unit of Epidemiology and Social Policies, Regional Health Authority, Valle D’Aosta  
39 19 Region, Aosta, Italy

40 20 <sup>7</sup> Regional Health Agency of Marche, Ancona, Italy

41 21 <sup>8</sup> ARIA S.p.a., Milan, Italy

42 22 <sup>9</sup> Epidemiologic Observatory, Regional Welfare Service, Lombardy Region, Milan, Italy

43 23 <sup>10</sup> Department of Health Planning, Italian Health Ministry, Rome, Italy

44 24 <sup>11</sup> Department of Internal Medicine, Hospital Fatebenefratelli - AFaR, Isola Tiberina, Rome, Italy

45 25 <sup>12</sup> Infectious Diseases Unit, Luigi Sacco Hospital, Milan, Italy

46 26 <sup>13</sup> Department of Biomedical and Clinical Sciences, University of Milan, Milan, Italy

47 27 <sup>14</sup> Emeritus Professor, University of Milano-Bicocca, Milan, Italy

48 28 <sup>15</sup> Policlinico di Monza, Monza, Italy  
49  
50  
51  
52  
53  
54  
55  
56  
57  
58  
59  
60

29

30



1  
2  
3 1 Word count (manuscript): 3,094  
4

5 2 Tables: 1  
6

7 3 Figures: 3  
8  
9  
10  
11  
12

13 4 **Address for correspondence:** Prof. Giovanni Corrao, Dipartimento di Statistica e Metodi  
14  
15 5 Quantitativi, Università degli Studi di Milano-Bicocca, Via Bicocca degli Arcimboldi, 8, Edificio  
16  
17 6 U7, 20126 Milano, Italy. Tel.: +39.02.64485854; E-mail: giovanni.corrao@unimib.it  
18  
19  
20

21 7  
22 8  
23 9  
24 10  
25  
26  
27  
28  
29  
30  
31  
32  
33  
34  
35  
36  
37  
38  
39  
40  
41  
42  
43  
44  
45  
46  
47  
48  
49  
50  
51  
52  
53  
54  
55  
56  
57  
58  
59  
60

1  
2  
3  
4  
5  
6  
7  
8  
9  
10  
11  
12  
13  
14  
15  
16  
17  
18  
19  
20  
21  
22  
23  
24  
25  
26  
27  
28  
29  
30  
31  
32  
33  
34  
35  
36  
37  
38  
39  
40  
41  
42  
43  
44  
45  
46  
47  
48  
49  
50  
51  
52  
53  
54  
55  
56  
57  
58  
59  
60

1 “Monitoring and Assessing care Pathways” MAP working group (Italian Health Ministry, Health  
2 Planning Dept):

- 3 • Italian Ministry of Health, Dept of Health Planning: Donata Bellentani, Simona Carbone  
4 (coordinator), Carla Ceccolini, Angela De Feo, Cristina Giordani, Rosanna Mariniello,  
5 Modesta Visca; Dept of health prevention: Natalia Magliocchetti, Giovanna Romano;  
6 External Expert: Antonio Lora, Paola Pisanti, Rinaldo Zanini.
- 7 • Polytechnic University of Marche (coordinator): Flavia Carle, Marica Iommi, Edlira  
8 Skrami.
- 9 • University of Milano-Bicocca, Laboratory of Healthcare Research &  
10 Pharmacoepidemiology: Anna Cantarutti, Giovanni Corrao, Matteo Monzio  
11 Compagnoni, Pietro Pugini, Federico Rea.
- 12 • Department of Epidemiology Lazio Region: Marina Davoli, Mirko Di Martino, Adele  
13 Lallo.
- 14 • Aosta Valley Region: Patrizia Vittori, Giuliana Vuillermin
- 15 • Campania Region: Alfonso Bernardo, Anna Frusciante
- 16 • Emilia Romagna Region: Laura Belotti, Rossana De Palma.
- 17 • Friuli Venezia Giulia Region: Andrea Di Lenarda, Marisa Prezza
- 18 • Lazio Region: Danilo Fusco, Chiara Marinacci
- 19 • Lombardy Region: Roberto Blaco, Olivia Leoni
- 20 • Marche Region: Liana Spazzafumo, Simone Pizzi
- 21 • Molise Region: Lolita Gallo
- 22 • Puglia Region: Ettore Attolini, Vito Lepore
- 23 • Sicily Region: Salvatore Scodotto, Giovanni De Luca
- 24 • Tuscany Region: Paolo Francesconi, Carla Rizzuti
- 25 • Veneto Region: Francesco Avossa, Silvia Vigna
- 26 • Research and Health Foundation (Fondazione ReS -Ricerca e Salute-): Letizia Dondi,  
27 Nello Martini, Antonella Pedrini, Carlo Piccinni
- 28 • National Agency for Regional Health Services: Mimma Cosentino, Maria Grazia  
29 Marvulli
- 30 • ANMCO (National Association of Hospital Cardiologists) Study Center: Aldo Maggioni

## Abstract

**Objectives.** To develop a new population-based risk stratification tool (Covid-Vulnerability Score, CVS) for predicting severe/fatal clinical manifestations of the SARS-CoV-2 infection using multiple source information provided by the healthcare utilization databases of the Italian National Health Service.

**Design.** Retrospective observational cohort study.

**Setting.** Population-based study using the healthcare utilization database of five Italian Regions.

**Participants.** Beneficiaries of the National Health Service, resident in one of the five participating Regions, aged 18-79 years, and not resident in a nursing home. The model was built from the 7,655,502 beneficiaries of the Lombardy Region Health Service.

**Main outcome measure.** The score included gender, age and 29 conditions selected from a list of 61 candidates for independently predicting severe/fatal clinical manifestations of infection. The outcome was the severe (ICU admitted)/fatal manifestations of Covid-19 experienced during the first epidemic wave (until June 2020). CVS performance was validated by applying the model to several validation sets (populations from Lombardy, second epidemic wave, and other four Italian regions during 2020) for a total of about 15.4 million individuals and 7,031 outcomes. Predictive performance was assessed by discrimination (areas under the ROC curve) and calibration (plot of observed vs. predicted outcomes).

**Results.** A clear positive trend towards increasing outcome incidence as CVS increases was observed. Areas under the ROC curve of CVS ranged from 0.85 to 0.88, which were better than those of generic scores such as the Charlson Comorbidity Score (0.60). A remarkable calibration of observed and predicted outcome probability was observed.

1  
2  
3  
4  
5  
6  
7  
8  
9  
10  
11  
12  
13  
14  
15  
16  
17  
18  
19  
20  
21  
22  
23  
24  
25  
26  
27  
28  
29  
30  
31  
32  
33  
34  
35  
36  
37  
38  
39  
40  
41  
42  
43  
44  
45  
46  
47  
48  
49  
50  
51  
52  
53  
54  
55  
56  
57  
58  
59  
60

1 **Conclusions.** A simple score from data used for public health management accurately predicted  
2 the occurrence of severe/fatal manifestations of Covid-19. Because of its performance, the use of  
3 CVS may help health decision-makers to achieve more accurate identification of high-risk citizens  
4 who need early preventive interventions.

5

For peer review only

### Strengths and limitations of this study

- The Covid-19-Vulnerability-Score (CVS), based on demographic (age and gender) and clinical (29 conditions and diseases) predictors, may be easily drawn from electronic health databases covering beneficiaries of health systems (e.g., National Health Service, health insurance companies).
- The CVS was developed and validated on a large and unselected population of more than 15 million of Italian individuals.
- The CVS was validated across different temporal (first and second epidemic wave) and geographic (five Italian Regions) conditions.
- Predictors were restricted to those routinely collected and available in the Italian administrative databases, thus education, functional status, and socioeconomic information were not included.

## Introduction

1  
2  
3  
4 1  
5  
6 2 The pandemic spread of the SARS-CoV-2 virus has dramatically exceeded the diagnostic and  
7  
8  
9 3 treatment capabilities of virtually all countries around the world. This has fuelled a debate on the  
10  
11 4 need to establish priority criteria that might identify Covid-19 patients at greater risk to progress  
12  
13 5 to hospitalization or a fatal event, in order to make them the preferential recipients of currently  
14  
15 6 available effective treatment strategies, the goal being to reduce the number of deaths and prevent  
16  
17  
18 7 collapse of hospital facilities. The problem involves who should receive early diagnostic testing,  
19  
20 8 who can be treated outside hospital among infected people, who should be given new, sometimes  
21  
22 9 expensive and necessarily rationed drugs (e.g., monoclonal antibodies [1]) and who should be  
23  
24  
25 10 selected for early vaccination. The case of vaccination is particularly delicate because demand will  
26  
27 11 outstrip supply for many months ahead in low- and middle-income countries.

28  
29  
30 12 Associations between certain chronic diseases and conditions and serious/critical/fatal clinical  
31  
32 13 manifestations of the SARS-CoV-2 infection have been reported from several studies [2-4], so  
33  
34 14 opening the gate towards identifying multiple prognostic factors for the Covid-19 disease.  
35  
36  
37 15 However, although some factors have been accepted as “established” by the scientific community,  
38  
39 16 their overall predictive value has not been robustly evaluated [5]. It should be in addition  
40  
41 17 considered that basing the prediction on a list of individual conditions or diseases does not take  
42  
43  
44 18 into account that comorbidities can make the global risk different from that predictable by  
45  
46 19 individual contributions. Finally, some predictive scores have been proposed and validated in  
47  
48 20 hospital care settings [6,7], their use requiring specialized image acquisition or sophisticated  
49  
50 21 laboratory examinations, which might be hardly applicable to the population at large. This implies  
51  
52  
53 22 that developing a score able to reliably predict the risk of progression of the Covid-19 disease to  
54  
55 23 its most severe or lethal forms in the general population via simple and easily collectable  
56  
57 24 information would be a valuable goal.

1  
2  
3 1 Our population-based study was performed under the auspices of the Italian Health Ministry. We  
4  
5 2 aimed to develop and validate a novel score predictive of severe/fatal clinical manifestations of  
6  
7 3 the SARS-CoV-2 infection using the multiple source information provided by the healthcare  
8  
9 4 utilization databases of the Italian National Health Service (NHS).  
10  
11  
12

## 13 5 **Methods**

### 16 6 **Setting**

17  
18  
19 7 This study was based on the NHS beneficiaries of five Italian Regions that voluntarily joined the  
20  
21 8 protocol and contributed to the data collection. The Regions are located in Northern (Valle d'Aosta  
22  
23 9 and Lombardy), Central (Marche), Southern (Puglia) and Islands (Sicily) of Italy. Overall, the data  
24  
25 10 covered nearly 20.5 million people (34% of the entire Italian population) who during 2020  
26  
27 11 experienced 712,408 cases of Covid-19, with a total of 31,957 deaths. Selected features of the  
28  
29 12 participating Regions are reported in supplementary **Table S1**.  
30  
31  
32

### 33 13 **Data sources**

34  
35  
36 14 All Italian citizens have equal access to healthcare services provided by the NHS. Computerized  
37  
38 15 information systems on the provided services have been created within each of the 21 Italian  
39  
40 16 Regions and autonomous Provinces, the related regional health care databases including 1)  
41  
42 17 demographic and administrative data of residents who receive NHS assistance (the NHS  
43  
44 18 beneficiaries, practically coinciding with the entire resident population); 2) hospital discharge  
45  
46 19 records reporting information on the primary diagnosis, as well as on up to five coexisting  
47  
48 20 conditions and procedures, coded according to the ICD-9-CM classification system  
49  
50 21 (<http://icd9.chrisendres.com/>); and 3) drug prescriptions reimbursed by the NHS, coded according  
51  
52 22 to the Anatomical Therapeutic Chemical (ATC) classification system  
53  
54 23 ([https://www.whocc.no/atc\\_ddd\\_index/](https://www.whocc.no/atc_ddd_index/)). Since the starting of the Covid-19 pandemic, almost all  
55  
56 24 Regions established, under the coordination of the National Health Institute, a population-based  
57  
58  
59  
60

1  
2  
3 1 registry of patients with a confirmed diagnosis of infection with the SARS-CoV-2 virus, and,  
4  
5 2 among these, those who were admitted to Intensive Care Units or died. In the present study, these  
6  
7  
8 3 various types of data were interconnected by using for each citizen a single identification code in  
9  
10 4 all databases. To preserve privacy, each identification code was automatically deidentified.  
11  
12 5 Analyses of the regional databases were performed under the rule that the inverse process, i.e.  
13  
14 6 patient identification, was allowed only to the Regional Health Authority upon request from the  
15  
16  
17 7 judicial authority.

### 8 **Candidate predictors**

9 Taking into consideration the morbidity and mortality predictors reported in epidemiological  
10 studies [5,7-9], as well as comorbidity scores widely used worldwide or tuned to the Italian  
11 population (the Charlson index (CCI) [10] and the Multisource Comorbidity Score (MCS),  
12 developed for the general Italian population [11]), we identified 61 candidate predictors. Twenty-  
13 seven candidate predictors were traced from inpatients diagnostic codes, five from outpatients who  
14 were prescribed drugs, and the remaining twenty-nine from both diagnostic and therapeutic codes,  
15 depending on the availability of specific diagnostic codes and drug therapies. Four of us (FR, DM,  
16 MG and GM) independently attributed the ICD-9 and ATC codes to the individuals in whom one  
17 or more of the 61 candidate predictors were detectable. Discrepancies were resolved in conference.  
18 The list of candidate predictors, and the corresponding codes, are reported in supplementary **Table**  
19 **S2**.

### 20 **Score development**

21 Since among the five participating Regions, Lombardy has the largest resident population (16%  
22 of the entire Italian population) and had been hit by the pandemic more than any other Region  
23 during the months between March and June 2020 (in that period 48% of the Covid-19 deaths  
24 registered in Italy occurred in Lombardy), we elected to use the data from the first epidemic wave  
25 that hit Lombardy to develop the score.



1  
2  
3 1 We included all the NHS beneficiaries who at February 21, 2020 were resident in Lombardy since  
4  
5 2 at least two years, were aged 18 to 79 years, and did not reside in a nursing home. Multivariate  
6  
7 3 logistic regression was fitted for investigating the association between gender, four age classes  
8  
9 4 (18-45, 46-59, 60-69 and 70-79 years) plus the above-mentioned 61 candidate predictors and the  
10  
11 5 odds of experiencing the outcome of interest, which was the composite of hospitalization in an  
12  
13 6 Intensive Care Unit or death with a Covid-19 diagnosis, up to June 30, 2020. Candidate predictors  
14  
15 7 entered as dichotomous variables in the model, with value 1 or 0 according to whether the specific  
16  
17 8 condition was or was not recorded at least once within the 781 days prior to the baseline period,  
18  
19 9 i.e., from January 1<sup>st</sup>, 2018 until February 20, 2020. The least absolute shrinkage and selection  
20  
21 10 operator (LASSO) method was applied for selecting the conditions able to predict the outcome  
22  
23 11 [12]. Finally, a score was assigned to each condition selected with the LASSO method by using  
24  
25 12 the coefficient estimated from the model. The coefficient was converted into a score by  
26  
27 13 multiplication by 10 and rounding to the nearest whole number. Scores were sequentially summed  
28  
29 14 to produce a total aggregate score. The index so obtained was termed Covid Vulnerability Score  
30  
31 15 (CVS). To verify the extension of the association between the increasing value of the score and  
32  
33 16 the increasing occurrence of severe/fatal forms of Covid-19, CVS categories of width 10 was  
34  
35 17 plotted against the outcome incidence. The prevalence of the Lombardy cohort members according  
36  
37 18 to CVS categories was also calculated. Restricted cubic spline with 3 degrees of freedom was used  
38  
39 19 to represent the corresponding smoothed trends [13].

## 20 **Score validation and performance**

21 With the aim to validate the model across different temporal and geographic conditions (i.e., to  
22 assess the performance of CVS across different levels of treatment options, climatic  
23 characteristics, intensity of the epidemic spread, etc.), the score developed from the Lombardy  
24 cohort hit by the first pandemic wave (derivation set) was applied to several validation sets selected  
25 by using the same inclusion/exclusion criteria of the derivation one. One validation set consisted

1  
2  
3  
4  
5  
6  
7  
8  
9  
10  
11  
12  
13  
14  
15  
16  
17  
18  
19  
20  
21  
22  
23  
24  
25  
26  
27  
28  
29  
30  
31  
32  
33  
34  
35  
36  
37  
38  
39  
40  
41  
42  
43  
44  
45  
46  
47  
48  
49  
50  
51  
52  
53  
54  
55  
56  
57  
58  
59  
60

of the cohort of Lombardy NHS beneficiaries who were free of Covid-19 up to July 1, 2020, after which date a new observation period was started and continued until censorship at the outcome occurrence (intensive care admissions or deaths) or at December 31, 2020, whatever happened first. Other validation sets consisted of NHS beneficiaries from each of the other regions included in the study. For these other regional cohorts, observations started on March 1, 2020 and was censored at the outcome occurrence or at December 31, 2020, whatever happened first.

The performance of CVS was assessed through discrimination and calibration. Discrimination was evaluated by the Receiver Operating Characteristic (ROC) curves and the corresponding underlying areas (AUCs) [14]. Calibration plots displayed observed vs. predicted outcome probabilities. The Hosmer-Lemeshow goodness-of-fit test modified by Yu et al [15] was used for testing the null hypothesis of agreement between observed and predicted outcome probabilities.

### **Patient and Public involvement**

No patients were involved in setting the research question or the outcome measures, nor were they involved in developing plans for design or implementation of the study. No patients were asked to advise on interpretation or writing up of results.

## **Results**

### **Covid-19 Vulnerability Score**

The 31 demographic and clinical conditions that significantly contributed to CVS are reported in **Table 1**. As expected, older age was the major contributor to the outcome of interest, but even male gender gave a relevant contribution. Nearly 40% of NHS beneficiaries had at least one clinical condition contributing to CVS. Diabetes (especially if under insulin therapy), psychosis, coronary and peripheral vascular disease, gout, use of corticosteroids, human immunodeficiency virus (HIV) infection, malignancies and anaemias were the most relevant contributors of the

1  
2  
3 1 outcome. However, other 19 clinical conditions (ranging across all major nosologic  
4  
5 2 macrocategories) contributed to CVS.

6  
7  
8 3 **Figure 1, upper box**, shows that the probability of experiencing the outcome of interest had a  
9  
10 4 clear positive trend as CVS increased, the risk being lower than 0.05% for CVS value  $\leq 29$ ,  
11  
12 5 progressing to 2% for a CVS value between 60 and 69, and reaching a much higher value (around  
13  
14 6 4%) for CVS values  $\geq 80$ . Sixty-nine percent of NHS beneficiaries had a CVS value  $\leq 29$ , almost  
15  
16 7 30% ranged from 30 and 69, and less than 1% (0.16%) exhibited a CVS value  $\geq 70$  (**Figure 1,**  
17  
18 8 **lower box**).

### 9 **Covid-19 Vulnerability Score performance**

10  
11 10 **Figure 2, left box**, shows that the area under the ROC curve of CVS was 0.89. This compared  
12  
13 11 favourably with the AUC of the models based on scores not specifically addressing Covid-19  
14  
15 12 whose AUC values were 0.60 and 0.77 for the CCI and MCS, respectively. The 95% confidence  
16  
17 13 intervals are not indicated in the Figure because, due to the very large sample size, they practically  
18  
19 14 coincided with the AUC values. As shown in **Figure 2, right box**, the CVS AUC values were  
20  
21 15 0.88, 0.86, 0.86, 0.85 and 0.86 for Lombardy, Valle d'Aosta, Marche, Puglia and Sicily cohorts,  
22  
23 16 respectively.

24  
25 17 **Figure 3** shows that there was a good agreement between the observed and the predicted outcome  
26  
27 18 probabilities, with calibration intercept close to the ideal value of 0 and recalibration slope close  
28  
29 19 to the ideal value of 1 (0.93). The null hypothesis of agreement between observed and predicted  
30  
31 20 frequencies could not be rejected according to the modified Hosmer-Lemeshow test.

## 21 **Discussion**

22  
23 22 Our study shows that a simple score based on demographic and clinical information derived from  
24  
25 23 healthcare utilization data currently used by all Italian Regions for the management of NHS is able

1  
2  
3  
4  
5  
6  
7  
8  
9  
10  
11  
12  
13  
14  
15  
16  
17  
18  
19  
20  
21  
22  
23  
24  
25  
26  
27  
28  
29  
30  
31  
32  
33  
34  
35  
36  
37  
38  
39  
40  
41  
42  
43  
44  
45  
46  
47  
48  
49  
50  
51  
52  
53  
54  
55  
56  
57  
58  
59  
60

1 to stratify NHS beneficiaries aged 18 to 79 years according to their risk to develop severe/fatal  
2 clinical manifestations of Covid-19. In a very large number of individuals from several Italian  
3 Regions the score we developed (termed Covid Vulnerability Score or CVS) exhibited a  
4 significantly better discriminating power than the CCI, i.e. the most worldwide used comorbidity  
5 score [10] which has been recently validated also for predicting mortality in Covid-19 patients  
6 hospitalised for pneumonia [16]. Furthermore, CVS outperformed a comorbidity score recently  
7 validated by our group for the general Italian population and found to outperform the CCI. This  
8 allows concluding that our CVS can reliably identify people in whom age, gender and a variety of  
9 comorbidities interact to make them frailer to the development of the severe and fatal clinical  
10 manifestations of the Covid-19 infection. This may provide a useful tool for establishing priority  
11 in the future vaccination programs for the general Italian population up to 79 years of age, with  
12 the exception of the priority given to individuals involved in specific job categories. The ongoing  
13 vaccination campaign was based in a descending fashion on age alone as well as on individually  
14 listed conditions or diseases that have shown a greater prevalence of severe or lethal Covid-19  
15 infections in clinical studies. This tool may find a useful application for the establishment of  
16 priority access to the third dose, and to future treatment options, such as monoclonal antibodies, if  
17 their cost will be too high to allow NHS to plan an extended use.

18 Our study identified several prognostic factors that, in addition to age and gender, predict the  
19 severity of Covid-19 and are included among the medical illnesses and dispensed drugs retrievable  
20 in the healthcare utilization database. Consistently with a recent meta-analysis [4], diabetes  
21 (mainly when under insulin therapy), cardiovascular disease (mainly coronary and peripheral  
22 vascular disease), hypertension, malignancies, chronic respiratory and kidney diseases, dementia  
23 and obesity were all associated with the Covid-19 outcome. People with HIV [17], and those who  
24 had a recent history of severe clinical manifestations of an infectious disease, including  
25 tuberculosis [18], also showed a significant association. Additionally, and according with other

1  
2  
3 1 studies, we found that diseases of the neurological system (e.g., epilepsy, recurrent seizures [19]  
4  
5 2 and Parkinson disease and parkinsonism [20]), of the gastrointestinal tract (e.g., liver cirrhosis and  
6  
7 3 other liver chronic diseases [21]), of the metabolism (e.g., gout [22]), of the skin (e.g. psoriasis  
8  
9 4 [23]), and of the blood and blood-forming organs (e.g. coagulation defects [24], anaemias [25])  
10  
11 5 contributed to the Covid-19 related clinical frailty. We also confirmed the involvement of frailty  
12  
13 6 conditions related to mental disorders, such as psychosis and depression [26] as well as of recent  
14  
15 7 dispensations of drugs with immunosuppressive properties (such as corticosteroids [27]) agents  
16  
17 8 against chronic pain, e.g., narcotic analgesics [28]), and with an anticoagulant [29] action. This  
18  
19 9 confirms the now established notion that alterations of the structure and function of virtually all  
20  
21 10 organs and systems of the body may adversely affect resistance to the Covid-19 disease. It should  
22  
23 11 be emphasized that the association between the severity of Covid-19 and the dispensed drugs we  
24  
25 12 found in our study is not in contrast with the frequent use of some of these drugs for the treatment  
26  
27 13 of Covid-19, because in our analysis previous drug therapies were searched for to further track  
28  
29 14 background comorbidities and not to investigate their possible direct effect on the disease. In this  
30  
31 15 context, it is likely that use of corticosteroids and other immunosuppressive agents reflected the  
32  
33 16 existence of autoimmune diseases, while use of anticoagulants reflected the existence of atrial  
34  
35 17 fibrillation, thromboembolic states or other cardiovascular disorders, which have been shown to  
36  
37 18 reduce patients' defence against and resistance to the virus [30].  
38  
39  
40  
41  
42  
43  
44

45 19 Our study has implications for several aspects of the public health policy against Covid-19 to be  
46  
47 20 considered in the future, in particular, as mentioned above, for the second vaccination program  
48  
49 21 planned by the Italian Ministry of Health. As done in the first campaign, this program offers early  
50  
51 22 cost-free priority immunization to people resident in a nursing home and those aged 80 years and  
52  
53 23 older, while in people aged 79 years or below vaccination is planned in the later stages of the  
54  
55 24 vaccination program possibly. The rationale for offering early vaccination to the oldest fraction of  
56  
57 25 the population is strong because of the 24,575 severe/fatal cases of Covid-19 registered in  
58  
59  
60

1  
2  
3  
4  
5  
6  
7  
8  
9  
10  
11  
12  
13  
14  
15  
16  
17  
18  
19  
20  
21  
22  
23  
24  
25  
26  
27  
28  
29  
30  
31  
32  
33  
34  
35  
36  
37  
38  
39  
40  
41  
42  
43  
44  
45  
46  
47  
48  
49  
50  
51  
52  
53  
54  
55  
56  
57  
58  
59  
60

1 Lombardy during 2020, almost 12,593 (51%) occurred in people aged 80 years and older.

2 Furthermore, in Italy the average age of Covid-19 fatalities during the entire pandemic period have  
3 been recently reported to be 82 years, which means that search for and use of a risk score more  
4 complex than age alone in octogenarians and nonagenarians may carry a limited practical  
5 advantage. On the contrary, use of our score may offer the possibility of identifying accurately  
6 younger high-risk people to whom offer vaccination at an earlier time.

7 The present study has several strengths. Because in Italy a public funded healthcare system  
8 involves virtually all citizens, our sample of NHS beneficiaries had not only an extremely large  
9 size but also reflected an unselected population. It is also a strength that the Italian healthcare  
10 utilization database allows to track services provided by the NHS with considerable accuracy  
11 because providers must document services to claim reimbursement, and incorrect reports carry  
12 legal consequences. It should also be emphasized the excellent ability of CVS for discriminating  
13 individuals who will experience and those who will not experience Covid-19 related serious  
14 complications. Finally, it is also remarkable that, although built according to Lombardy data  
15 collected during the first epidemic wave (i.e. before the summer 2020), CVS performed similarly  
16 well during the second epidemic wave (i.e. after the summer 2020), in which knowledge on  
17 treatment options for Covid-19 improved, as well as in other areas of Italy, with different social  
18 features, climatic characteristics, and intensity of the epidemic spread. This suggests that the  
19 advantages of the CVS score for stratification of the risk the Covid-19 complications extends  
20 across different temporal and geographic conditions.

21 Limitations are that the predictors of Covid-19 we searched for are restricted to those routinely  
22 collected and available in the administrative databases, which are the same for all Regions of Italy,  
23 i.e., hospital admissions and drug dispensed. Thus, education, functional status, socioeconomic  
24 information, and extra-clinical factors that can affect the prognosis of Covid-19 patients were not  
25 included. Our scoring system did not capture the severity of associated comorbidities, as well as

1  
2  
3 1 health services and treatments supplied by private providers. Misdiagnosis (due to poor accuracy  
4  
5 2 in reporting diagnoses and comorbidities) and upcoding in hospital records (sometimes in pursuit  
6  
7 of higher reimbursements) might have generated too conservative estimates of the CVS  
8 3  
9 performance.  
10 4

11  
12  
13 5 Finally, our approach may have failed to identify comorbidities that, albeit increase the risk of  
14  
15 6 severe/fatal clinical manifestations, limit social contacts, thereby escaping infection by the SARS-  
16  
17 7 CoV-2 virus. However, because the purpose of our study was to identify individuals to which offer  
18  
19 8 earlier protection, patients with a disease that makes them unexposed to the infection should  
20  
21 9 receive later preventive interventions (i.e., treatments or vaccination). Of course, exclusion from  
22  
23 10 the scoring system of diseases so debilitating or incapacitating to limit social contacts but requiring  
24  
25 11 a caregiver is a major limitation of our study.  
26  
27  
28

## 29 12 **Conclusion**

30  
31  
32  
33 13 In summary, we developed and validated a simple score derived from data used for public health  
34  
35 14 management, which predicts severe/fatal outcomes of Covid-19 in a large number of beneficiaries  
36  
37 15 of the Italian NHS more accurately than other available scores. Our findings show that this can be  
38  
39 16 achieved by combined use of demographic (age and gender) and clinical (29 conditions/diseases)  
40  
41 17 predictors of the outcome. Because of its performance, use of this score may help health decision  
42  
43 18 makers to achieve a more accurate identification of high-risk citizens who need early preventive  
44  
45 19 interventions.  
46  
47  
48  
49  
50 20  
51  
52  
53  
54  
55  
56  
57  
58  
59  
60

## 1 Funding

2 This study was funded by a research grant from the Italian Health Ministry: “Modelli per il  
3 monitoraggio e la valutazione delle cure integrate (CI) nell’ambito del Nuovo Sistema di Garanzia  
4 dell’assistenza sanitaria“ project (grant number J59H06000160001). The funding source had no  
5 role in the design and conduct of the study; collection, management, analysis, and interpretation  
6 of the data; preparation, review, or approval of the manuscript; and decision to submit the  
7 manuscript for publication.

## 9 Conflicts of Interest

10 Giovanni Corrao received research support from the European Community (EC), the Italian  
11 Agency of Drug (AIFA), the Italian Ministry of Education, University and Research (MIUR), and  
12 the Italian Health Ministry. He took part to a variety of projects that were funded by pharmaceutical  
13 companies (i.e., Novartis, GSK, Roche, AMGEN and BMS). He also received honoraria as  
14 member of Advisory Board from Roche.

15 Giuseppe Mancina received honoraria for participation as speaker/chairman in  
16 national/international meetings from Boehringer Ingelheim, Ferrer, Medtronic, Menarini Int,  
17 Merck Serono, Recordati, and Servier.

18 For the remaining authors, nothing was declared.

## 20 Contributors

21 GC conceived the idea for this manuscript. GC, FR and FC designed the study. GC and GM drafted  
22 the manuscript. FR, AA, ADE, SA, MI and ME performed the data analysis. SS, VL, CT, PV, LS,



1 and RB extracted the data and authorised their utilisation. - GC, FC, SC, CG, DM, MG, and GM  
2 supervised the project. All authors assisted the results interpretation and manuscript revision. All  
3 authors read and approved the final manuscript.

#### 4 5 **Ethical approval**

6 Under the rules of the Italian Drugs Agency (available at:  
7 [http://www.agenziafarmaco.gov.it/sites/default/files/det\\_20marzo2008.pdf](http://www.agenziafarmaco.gov.it/sites/default/files/det_20marzo2008.pdf)), retrospective studies  
8 using administrative databases do not require Ethics Committee protocol approval.

#### 9 10 **Data sharing**

11 The data that support the findings of this study are available from the Italian Regions, but  
12 restrictions apply to the availability of these data, which were used under license for the current  
13 study, and so are not publicly available. Data are however available from the Italian Regions upon  
14 reasonable request.

#### 15 16 **Dissemination to participants and related patient and public communities**

17 There are no plans to disseminate the results of the research to study participants or the relevant  
18 patient community.

19  
20 The lead author (the manuscript's guarantor) affirms that the manuscript is an honest, accurate,  
21 and transparent account of the study being reported; that no important aspects of the study have

1  
2  
3  
4  
5  
6  
7  
8  
9  
10  
11  
12  
13  
14  
15  
16  
17  
18  
19  
20  
21  
22  
23  
24  
25  
26  
27  
28  
29  
30  
31  
32  
33  
34  
35  
36  
37  
38  
39  
40  
41  
42  
43  
44  
45  
46  
47  
48  
49  
50  
51  
52  
53  
54  
55  
56  
57  
58  
59  
60

1 been omitted; and that any discrepancies from the study as planned (and, if relevant, registered)  
2 have been explained.

For peer review only

## References

- 1 [1] Lloyd EC, Gandhi TN, Petty LA. Monoclonal Antibodies for COVID-19. JAMA. 2021 Feb 5.  
2 doi: 10.1001/jama.2021.1225. Epub ahead of print. PMID: 33544136
- 3 [2] Földi M, Farkas N, Kiss S, et al. Obesity is a risk factor for developing critical condition in  
4 COVID-19 patients: A systematic review and meta-analysis. *Obes Rev*. 2020 Oct;21(10):e13095
- 5 [3] Mantovani A, Byrne CD, Zheng MH, Targher G. Diabetes as a risk factor for greater COVID-  
6 19 severity and in-hospital death: A meta-analysis of observational studies. *Nutr Metab Cardiovasc*  
7 *Dis* 2020;30:1236-48
- 8 [4] Lippi G., Wong J., Henry B. M. Hypertension and its severity or mortality in Coronavirus  
9 Disease 2019 (COVID-19): a pooled analysis. *Polish Archives of Internal Medicine* 2020 doi:  
10 10.20452/pamw.15272
- 11 [5] Izcovich A, Ragusa MA, Tortosa F, et al. Prognostic factors for severity and mortality in  
12 patients infected with COVID-19: A systematic review. *PLoS One* 2020;15:e0241955
- 13 [6] Liang W, Liang H, Ou L, Chen B, Chen A, Li C, et al. Development and Validation of a  
14 Clinical Risk Score to Predict the Occurrence of Critical Illness in Hospitalized Patients with  
15 COVID-19. *JAMA Intern Med*. 2020; 10.1001/jamainternmed.2020.2033
- 16 [7] Wynants L, Van Calster B, Collins GS, et al. Prediction models for diagnosis and prognosis of  
17 covid-19 infection: systematic review and critical appraisal. *BMJ* 2020;369:m1328
- 18 [8] Gupta RK, Marks M, Samuels THA, et al; UCLH COVID-19 Reporting Group. Systematic  
19 evaluation and external validation of 22 prognostic models among hospitalised adults with  
20 COVID-19: an observational cohort study. *Eur Respir J* 2020;56:2003498
- 21 [9] Ebrahimi M, Malehi AS, Rahim F. COVID-19 Patients: A Systematic Review and Meta-  
22 Analysis of Laboratory Findings, Comorbidities, and Clinical Outcomes Comparing Medical Staff  
23 versus the General Population. *Osong Public Health Res Perspect* 2020;11:269-79

- 1  
2  
3 1 [10] Charlson ME, Pompei P, Ales KL, MacKenzie CR. A new method of classifying prognostic  
4  
5 2 comorbidity in longitudinal studies: development and validation. *J Chronic Dis* 1987;40:373-83  
6  
7  
8 3 [11] Corrao G, Rea F, Di Martino M, et al. Developing and validating a novel multisource  
9  
10 4 comorbidity score from administrative data: a large population-based cohort study from Italy. *BMJ*  
11  
12 5 *Open* 2017;7:e019503  
13  
14  
15 6 [12] Tibshirani R. The LASSO method for variable selection in the Cox model. *Stat Med*  
16  
17 7 1997;16:385-95  
18  
19 8 [13] Gauthier J, Wu QV, Gooley TA. Cubic splines to model relationships between continuous  
20  
21 9 variables and outcomes: a guide for clinicians. *Bone Marrow Transplantation* 2020;55:675-80  
22  
23  
24 10 [14] Pencina MJ, D'Agostino RB Sr, D'Agostino RB Jr. Evaluating the added predictive ability of  
25  
26 11 a new marker: From area under the ROC curve to reclassification and beyond. *Stat Med*  
27  
28 12 2008;27:157-72  
29  
30  
31 13 [15] Yu W, Xu W, Zhu L. A modified Hosmer–Lemeshow test for large data sets. *Communications*  
32  
33 14 *in Statistics - Theory and Methods* 2017;46:11813-25  
34  
35 15 [16] Christensen DM, Strange JE, Gislason G, et al. Charlson Comorbidity Index Score and Risk  
36  
37 16 of Severe Outcome and Death in Danish COVID-19 Patients. *J Gen Intern Med* 2020;35:2801-3  
38  
39  
40 17 [17] Shareef MA, Bashaiwth HM, AlAkbari AO, et al. A systematic review of contemporary  
41  
42 18 evidence on SARS-CoV-2 and HIV coinfection: What does it look like up to date? *Avicenna J*  
43  
44 19 *Med* 2020;10:189-97  
45  
46  
47 20 [18] Liu Y., Bi L., Chen Y. Active or latent tuberculosis increases susceptibility to COVID-19 and  
48  
49 21 disease severity. *medRxiv*. March 2020 doi: 10.1101/2020.03.10.20033795. 2020.03.10.20033795  
50  
51 22 [19] Cabezudo-Garcia P, Ciano-Petersen NL, Mena-Vazquez N, et al. Incidence and case fatality  
52  
53 23 rate of COVID-19 in patients with active epilepsy. *Neurology* 2020;95:e1417-e1425  
54  
55  
56 24 [20] Vignatelli L, Zenesini C, Belotti LMB, et al. Risk of hospitalization and death for COVID-19  
57  
58 25 in people with Parkinson's disease or parkinsonism. *Mov Disord*. 2020 Nov  
59  
60 26 16:10.1002/mds.28408

- 1  
2  
3 1 [21] Bajaj JS, Garcia-Tsao G, Wong F, et al. Cirrhosis is associated with high mortality and  
4 readmissions over 90 days regardless of COVID-19: A multi-center cohort. *Liver Transpl* 2021  
5  
6 2 Jan 11. doi: 10.1002/lt.25981  
7  
8 3  
9  
10 4 [22] Safdarian AR, Momenzadeh K, Kahe F, Farhangnia P, Rezaei N. Death due to COVID-19 in  
11 a patient with diabetes, epilepsy, and gout comorbidities. *Clin Case Rep* 2020 Nov  
12 5  
13 6 25:10.1002/ccr3.3557  
14  
15 6  
16  
17 7 [23] Mahil SK, Dand N, Mason KJ, et al. Factors associated with adverse COVID-19 outcomes in  
18 patients with psoriasis-insights from a global registry-based study. *J Allergy Clin Immunol*  
19 8  
20 9 2021;147:60-71  
21  
22 9  
23  
24 10 [24] Tang N, Li D, Wang X, Sun Z. Abnormal coagulation parameters are associated with poor  
25 prognosis in patients with novel coronavirus pneumonia. *J Thromb Haemost* 2020;18:844-7  
26 11  
27  
28 12 [25] Roy NBA, Telfer P, Eleftheriou P, et al. Protecting vulnerable patients with inherited  
29 13 anaemias from unnecessary death during the COVID-19 pandemic. *Br J Haematol* 2020;189:635-9  
30  
31 13  
32  
33 14 [26] Druss BG. Addressing the COVID-19 pandemic in populations with serious mental illness.  
34 *JAMA Psychiatry* 2020;77:891-2  
35 15  
36  
37 16 [27] Suissa S, Patenaude V, Lapi F, Erns P. Inhaled corticosteroids in COPD and the risk of serious  
38 17 pneumonia. *Thorax* 2013;68:1029-36  
39  
40 17  
41  
42 18 [28] Wiese AD, Griffin MR, Schaffner W, et al. Long-acting Opioid Use and the Risk of Serious  
43 19 Infections: A Retrospective Cohort Study. *Clin Infect Dis* 2019;68:1862-9  
44  
45 19  
46  
47 20 [29] Kollias A, Kyriakoulis KG, Dimakakos E, et al. Thromboembolic risk and anticoagulant therapy  
48 in COVID-19 patients: emerging evidence and call for action. *Br J Haematol* 2020;189:846-7  
49 21  
50  
51 22 [30] Rentsch CT, Beckman JA, Tomlinson L, et al. Early initiation of prophylactic anticoagulation  
52 23 for prevention of COVID-19 mortality: a nationwide cohort study of hospitalized patients in the  
53 24 United States. *medRxiv*. 2020 Dec 11:2020.12.09.20246579  
54  
55  
56  
57  
58  
59  
60

**Table 1.** Prevalence of male gender, age categories and 29 conditions/diseases contributing to the Covid Vulnerability Score (CVS). For each listed contributor, the outcome incidence among the exposed people, the odds ratio (and 90% confidence interval), and the corresponding weight of the contribution to CVS, are reported

|                                                        | No. (%)           | No. outcome events | Incidence every 10,000 | Odds ratio† | (90% confidence interval†) | Weight‡ |
|--------------------------------------------------------|-------------------|--------------------|------------------------|-------------|----------------------------|---------|
| Male gender                                            | 3,797,636 (49.6%) | 6,849              | 18.0                   | 3.07        | 2.95 to 3.19               | 11      |
| Age ≤ 45                                               | 3,111,426 (40.6%) | 271                | 0.9                    | 1.00        | (reference)                | 0       |
| Age 46-59                                              | 2,305,062 (30.1%) | 1,435              | 6.2                    | 5.95        | (5.36 to 6.62)             | 18      |
| Age 60-69                                              | 1,222,310 (16.0%) | 2,506              | 20.5                   | 15.62       | (14.09 to 17.32)           | 27      |
| Age 70-79                                              | 1,016,704 (13.3%) | 4,948              | 48.7                   | 27.64       | (24.96 to 30.61)           | 33      |
| HIV infection                                          | 31,300 (0.4%)     | 154                | 49.2                   | 1.52        | (1.33 to 1.74)             | 4       |
| Other infectious and parasitic diseases                | 42,422 (0.6%)     | 443                | 104.4                  | 1.37        | (1.26 to 1.49)             | 3       |
| Malignancies                                           | 177,024 (2.3%)    | 1,073              | 60.6                   | 1.42        | (1.35 to 1.50)             | 4       |
| Diabetes without insulin therapy                       | 278,785 (3.6%)    | 1,419              | 50.9                   | 1.60        | (1.53 to 1.68)             | 5       |
| Insulin therapy                                        | 101,996 (1.3%)    | 973                | 95.4                   | 2.35        | (2.21 to 2.49)             | 9       |
| Obesity                                                | 16,571 (0.2%)     | 103                | 62.2                   | 1.34        | (1.13 to 1.58)             | 3       |
| Disorders of fluid, electrolyte, and acid-base balance | 8,576 (0.1%)      | 135                | 157.4                  | 1.29        | (1.11 to 1.49)             | 3       |
| Gout                                                   | 164,428 (2.2%)    | 1,518              | 92.3                   | 1.57        | (1.50 to 1.66)             | 5       |
| Coagulation defects                                    | 3,603 (0.1%)      | 36                 | 99.9                   | 1.41        | (1.07 to 1.85)             | 3       |
| Anaemias                                               | 613,430 (8.0%)    | 2,228              | 36.3                   | 1.51        | (1.45 to 1.58)             | 4       |
| Dementia / Alzheimer                                   | 12,671 (0.2%)     | 145                | 114.4                  | 1.26        | (1.09 to 1.46)             | 2       |
| Psychosis                                              | 138,034 (1.8%)    | 684                | 49.6                   | 1.94        | (1.80 to 2.08)             | 7       |
| Depression                                             | 588,688 (7.7%)    | 1,729              | 29.4                   | 1.35        | (1.29 to 1.42)             | 3       |
| Parkinson's disease and parkinsonism                   | 40,885 (0.5%)     | 274                | 67.0                   | 1.21        | (1.09 to 1.34)             | 2       |
| Epilepsy and recurrent seizures                        | 122,171 (1.6%)    | 510                | 41.7                   | 1.37        | (1.26 to 1.48)             | 3       |
| Other diseases of the nervous system and sense organs  | 35,495 (0.5%)     | 253                | 71.3                   | 1.26        | (1.13 to 1.40)             | 2       |
| Ischaemic Heart Disease/Angina                         | 91,539 (1.2%)     | 845                | 92.3                   | 1.18        | (1.11 to 1.26)             | 2       |
| Heart failure                                          | 21,840 (0.3%)     | 428                | 196.0                  | 1.30        | (1.18 to 1.43)             | 3       |
| Vascular diseases                                      | 14,936 (0.2%)     | 217                | 145.3                  | 1.17        | (1.04 to 1.32)             | 2       |
| Cerebrovascular diseases                               | 35,205 (0.5%)     | 333                | 94.6                   | 1.12        | (1.02 to 1.23)             | 1       |
| Hypertension                                           | 796,044 (10.4%)   | 3,136              | 39.4                   | 1.20        | (1.15 to 1.25)             | 2       |

|                                                           |                   |       |       |      |                |   |
|-----------------------------------------------------------|-------------------|-------|-------|------|----------------|---|
| Coronary and peripheral vascular disease                  | 658,737 (8.6%)    | 2,668 | 40.5  | 1.75 | (1.68 to 1.82) | 6 |
| Oral anticoagulant agents                                 | 144,713 (1.9%)    | 1,221 | 84.4  | 1.39 | (1.32 to 1.47) | 3 |
| COPD/Asthma                                               | 20,034 (0.3%)     | 268   | 133.8 | 1.15 | (1.03 to 1.28) | 1 |
| Liver cirrhosis and other liver chronic diseases          | 29,484 (0.4%)     | 177   | 60.0  | 1.31 | (1.16 to 1.49) | 3 |
| Chronic kidney disease                                    | 17,109 (0.2%)     | 371   | 216.8 | 1.32 | (1.20 to 1.46) | 3 |
| Diseases of the skin and subcutaneous tissues             | 106,747 (1.4%)    | 353   | 33.1  | 1.10 | (1.00 to 1.20) | 1 |
| Chronic pain                                              | 191,442 (2.5%)    | 1,007 | 52.6  | 1.28 | (1.21 to 1.36) | 2 |
| Corticosteroids                                           | 935,246 (12.2%)   | 2,588 | 27.7  | 1.62 | (1.55 to 1.68) | 5 |
| Individuals without any of the 29 conditions above listed | 4,600,012 (60.1%) | 1,350 | 2.9   | -    | -              | - |

HIV, Human immunodeficiency virus; COPD, Chronic obstructive pulmonary disease

The analysis was based on the cohort of 7,655,502 beneficiaries of the Lombardy Region Health Service for at least two years, who on February 21, 2020 were alive, aged between 18 and 79 years and did not reside in a nursing home. During the first epidemic wave (until June 2020), this cohort experienced 9,160 severe (ICU admitted and mechanically ventilated via intubation) and / or fatal outcomes. The average incidence rate during the first wave was therefore 12.0 cases per 10,000 people at risk

† Odds ratio, and 90% confidence interval, estimated by multivariable logistic regression. Odds ratios measured the strength of the association between the presence/absence of each of the listed contributors and the outcome odds

‡ Weights were obtained from the coefficients of the logistic model; the latter were converted into scores by multiplying them by 10 and rounding them to the nearest whole number

## Legend of Figures

**Figure 1.** Relationship between categories of CoViD-19 Vulnerability Score and (i) the risk of occurrence of severe/fatal forms of Covid-19 (upper box), (ii) its distribution among NHS beneficiaries (bottom box). Columns indicate the observed values (of risk and prevalence respectively). Solid and dashed lines respectively represent the fitted cubic spline with the corresponding 5<sup>th</sup> and 95<sup>th</sup> percentiles

**Footnote.** The analysis was based on the cohort of 7,655,502 beneficiaries of the Lombardy Region Health Service for at least two years, who on February 21, 2020 were alive, aged between 18 and 79 years and did not reside in a nursing home. During the first epidemic wave (until June 2020), this cohort experienced 9,160 severe (ICU admitted and mechanically ventilated via intubation) and / or fatal outcomes. The average incidence rate during the first wave was therefore 12.0 cases per 10,000 people at risk.

**Figure 2.** Receiver Operating Characteristics (ROC) curves comparing discriminant power (i) of CoViD-19 Vulnerability Score (CVS), Charlson Comorbidity Index (CCI) and Multisource Comorbidity Score (MCS) from the derivation set (left box); (ii) of CoViD-19 Vulnerability Score (CVS) from several validation sets (right box)

**Footnote.** Derivation set (left box) was based on the cohort of 7,655,502 beneficiaries of the Lombardy Region Health Service for at least two years, who on February 21, 2020 were alive, aged between 18 and 79 years and did not reside in a nursing home. During the first epidemic wave (until June 2020), this cohort experienced 9,160 severe (ICU admitted and mechanically ventilated via intubation) and / or fatal outcomes. Validation sets (right box) were based on: (i) 7,575,924 resident in Lombardy whom observation started on July 1, 2020 and who experienced 2,822 severe/fatal outcomes within December 31, 2020; (ii) 92,267, 1,110,570, 3,012,754 and 3,649,518 beneficiaries of Valle d'Aosta, Marche, Puglia and Sicily regional health services, whom observation started on March 1, 2020 and who respectively experienced 173, 542, 1,953 and 1,541 severe/fatal outcomes within December 31, 2020

**Figure 3.** Calibration plot of observed (X-axis) vs predicted (Y-axis) risk of severe/fatal outcomes

**Footnote.** The analysis was based on the pooled validation sets of 15,441,033 from Lombardy, Valle d'Aosta, Marche, Puglia and Sicily who experienced 7,031 severe/fatal outcomes from starting (July 1, 2020 in Lombardy, or March 1, 2020 in the other regions) until December 31, 2020



1  
2  
3  
4  
5  
6  
7  
8  
9  
10  
11  
12  
13  
14  
15  
16  
17  
18  
19  
20  
21  
22  
23  
24  
25  
26  
27  
28  
29  
30  
31  
32  
33  
34  
35  
36  
37  
38  
39  
40  
41  
42  
43  
44  
45  
46  
47  
48  
49  
50  
51  
52  
53  
54  
55  
56  
57  
58  
59  
60

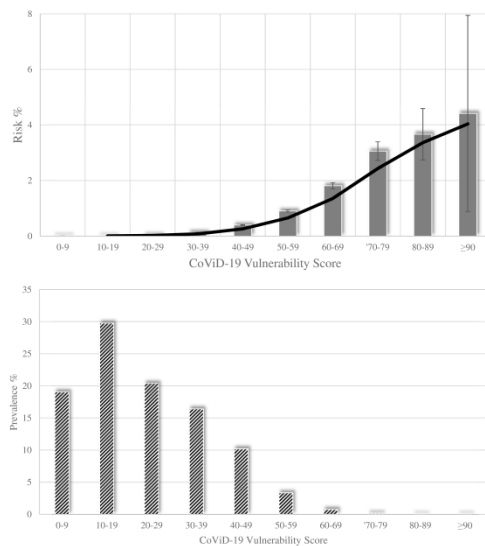

Relationship between categories of CoViD-19 Vulnerability Score and (i) the risk of occurrence of severe/fatal forms of Covid-19 (upper box), (ii) its distribution among NHS beneficiaries (bottom box). Columns indicate the observed values (of risk and prevalence respectively). Solid and dashed lines respectively represent the fitted cubic spline with the corresponding 5th and 95th percentiles

1  
2  
3  
4  
5  
6  
7  
8  
9  
10  
11  
12  
13  
14  
15  
16  
17  
18  
19  
20  
21  
22  
23  
24  
25  
26  
27  
28  
29  
30  
31  
32  
33  
34  
35  
36  
37  
38  
39  
40  
41  
42  
43  
44  
45  
46  
47  
48  
49  
50  
51  
52  
53  
54  
55  
56  
57  
58  
59  
60

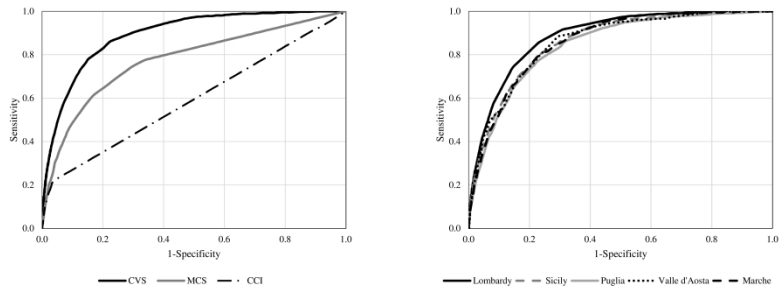

Receiver Operating Characteristics (ROC) curves comparing discriminant power (i) of CoViD-19 Vulnerability Score (CVS), Charlson Comorbidity Index (CCI) and Multisource Comorbidity Score (MCS) from the derivation set (left box); (ii) of CoViD-19 Vulnerability Score (CVS) from several validation sets (right box)

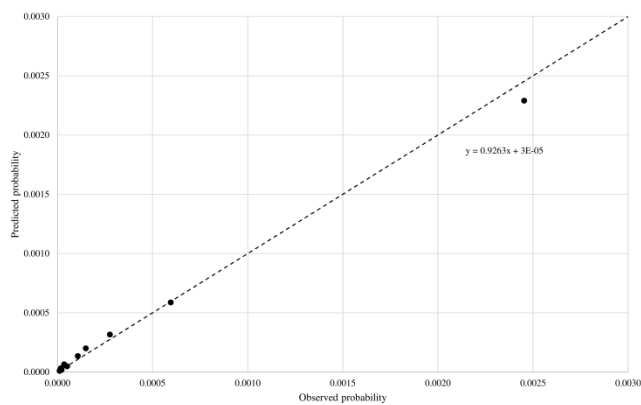

Calibration plot of observed (X-axis) vs predicted (Y-axis) risk of severe/fatal outcomes

1  
2  
3  
4 **Addressing vaccination priority by stratifying general population according**  
5  
6  
7 **with frailty: a large population-based cohort study**  
8  
9

10  
11 Giovanni Corrao, PhD<sup>1,2</sup>, Federico Rea, PhD<sup>1,2</sup>, Flavia Carle, PhD<sup>1,3</sup>, Salvatore Sccondotto, PhD<sup>1,4</sup>,  
12  
13 Alessandra Allotta, MSc<sup>4</sup>, Vito Lepore, MD<sup>5</sup>, Antonio D’Ettorre, MSc<sup>5</sup>, Cinzia Tanzarella, MSc<sup>5</sup>,  
14  
15 Patrizia Vittori, MSc<sup>6</sup>, Sabrina Abena, MSc<sup>6</sup>, Marica Iommi, PhD<sup>3</sup>, Liana Spazzafumo, MSc<sup>1,7</sup>,  
16  
17 Michele Ercolanoni, MSc<sup>8,9</sup>, Roberto Blaco, MSc<sup>9</sup>, Simona Carbone, MSc<sup>10</sup>, Cristina Giordani,  
18  
19 MSc<sup>10</sup>, Dario Manfellotto, MD<sup>11</sup>, Massimo Galli, MD<sup>12,13</sup>, Giuseppe Mancina, MD<sup>14,15</sup> on behalf of  
20  
21 the “Monitoring and Assessing care Pathways (MAP)” working group of the Italian Ministry of  
22  
23 Health  
24  
25  
26  
27  
28  
29

30 <sup>1</sup> National Centre for Healthcare Research and Pharmacoepidemiology, University of Milano-  
31 Bicocca, Milan, Italy

32 <sup>2</sup> Unit of Biostatistics, Epidemiology and Public Health, Department of Statistics and Quantitative  
33 Methods, University of Milano-Bicocca, Milan, Italy

34 <sup>3</sup> Center of Epidemiology and Biostatistics, Polytechnic University of Marche, Ancona, Italy

35 <sup>4</sup> Department of Health Services and Epidemiological Observatory, Regional Health Authority,  
36 Sicily Region, Palermo, Italy

37 <sup>5</sup> Regional Health Agency of Puglia (Agenzia regionale socio-sanitaria), Bari, Italy

38 <sup>6</sup> Regional Unit of Epidemiology and Social Policies, Regional Health Authority, Valle D’Aosta  
39 Region, Aosta, Italy

40 <sup>7</sup> Regional Health Agency of Marche, Ancona, Italy

41 <sup>8</sup> ARIA S.p.a., Milan, Italy

42 <sup>9</sup> Epidemiologic Observatory, Regional Welfare Service, Lombardy Region, Milan, Italy

43 <sup>10</sup> Department of Health Planning, Italian Health Ministry, Rome, Italy

44 <sup>11</sup> Department of Internal Medicine, Hospital Fatebenefratelli - AFaR, Isola Tiberina, Rome, Italy

45 <sup>12</sup> Infectious Diseases Unit, Luigi Sacco Hospital, Milan, Italy

46 <sup>13</sup> Department of Biomedical and Clinical Sciences, University of Milan, Milan, Italy

47 <sup>14</sup> Emeritus Professor, University of Milano-Bicocca, Milan, Italy

48 <sup>15</sup> Policlinico di Monza, Monza, Italy  
49  
50  
51  
52  
53

54 **SUPPLEMENTARY MATERIAL**  
55  
56  
57  
58  
59  
60

**Supplementary Table S1.** Selected features of regional populations included into the validation study in comparison with entire Italian population

| Region        | Location       | Indicators of Covid-19 Epidemic Spread<br>(March-December 2020)‡ |                                  |                   |        |
|---------------|----------------|------------------------------------------------------------------|----------------------------------|-------------------|--------|
|               |                | Italian 2020 population census†                                  |                                  | Ascertained cases | Deaths |
|               |                | Whole population                                                 | Population aged<br>18 – 79 years |                   |        |
| Lombardy      | Norther Italy  | 10,027,602                                                       | 7,663,864                        | 478,903           | 25,123 |
| Valle d'Aoste | North Italy    | 125,034                                                          | 95,914                           | 7,273             | 379    |
| Marche        | Central Italy  | 1,512,672                                                        | 1,150,809                        | 41,624            | 1,571  |
| Puglia        | Southern Italy | 3,953,305                                                        | 3,055,720                        | 90,964            | 2,472  |
| Sicily        | Island         | 4,875,290                                                        | 3,744,848                        | 93,644            | 2,412  |
|               | Total          | 20,493,903                                                       | 15,711,155                       | 712,408           | 31,957 |
|               | Italy          | 59,641,488                                                       | 45,788,626                       | 2,107,166         | 74,159 |

† source: <http://demo.istat.it/popres/index.php?anno=2020&lingua=ita>

‡ source: Protezione Civile. Dati COVID-19 Italia (available at <https://github.com/pcm-dpc/COVID-19>)

**Supplementary Table S2.** List of candidate conditions for predicting the risk of experiencing severe fatal forms of COVID-19 infection

| Diagnostic categories                                                 | #                                              | Disease / condition                                                    | ICD-9 CM                                                                                                                                                                         | ATC                                                                                                                    |                            |
|-----------------------------------------------------------------------|------------------------------------------------|------------------------------------------------------------------------|----------------------------------------------------------------------------------------------------------------------------------------------------------------------------------|------------------------------------------------------------------------------------------------------------------------|----------------------------|
| Infectious and parasitic diseases                                     | 1                                              | HIV infection                                                          | 042.x, V08                                                                                                                                                                       | J05AB14, J05AE, J05AF01, J05AF02, J05AF04, J05AF05, J05AF06, J05AF09, J05AG, J05AR, J05AX07, J05AX08, J05AX09, J05AX12 |                            |
|                                                                       | 2                                              | Tuberculosis and Other infectious and parasitic diseases               | 010.x - 018.x, 001.x-009.x, 020.x-027.x, 030.x-041.x, 045.x-057.x, 060.x-066.x, 070.x-088.x, 090.x-104.x, 110.x-118.x, 120.x-139.x                                               | J04AB                                                                                                                  |                            |
| Neoplasms                                                             | 3                                              | Solid malignancies and Neoplasm of lymphatic and haematopoietic tissue | 140.x-165.x, 170.x-176.x, 179.x-199.x, V58.0, 92.2, 200.x-208.x                                                                                                                  | L01, L03AC, L02BA01, L02BA02, L02BG02, L02BG03, L02BG04, L02BG06, L02BB01, L02BB03, L02AE02, L02AE04, L02AB01          |                            |
|                                                                       | 4                                              | Benign neoplasm and carcinoma in situ                                  | 210.x-234.x                                                                                                                                                                      |                                                                                                                        |                            |
| Endocrine, nutritional and metabolic diseases, and immunity disorders | 5                                              | Hypothyroidism                                                         | 243, 244.x                                                                                                                                                                       | H03A, H03B                                                                                                             |                            |
|                                                                       | 6                                              | Hyper e hypoparathyroidism                                             | 252.0, 252.1                                                                                                                                                                     |                                                                                                                        |                            |
|                                                                       | 7                                              | Diabetes without insulin therapy                                       | 250.x, 348.0x, 357.2, 362.0, 366.41                                                                                                                                              | A10B                                                                                                                   |                            |
|                                                                       | 8                                              | Insulin therapy                                                        |                                                                                                                                                                                  | A10A                                                                                                                   |                            |
|                                                                       | 9                                              | Dyslipidaemia                                                          | 272.2, 272.4                                                                                                                                                                     | C10                                                                                                                    |                            |
|                                                                       | 10                                             | Obesity                                                                | 278.0x                                                                                                                                                                           |                                                                                                                        |                            |
|                                                                       | 11                                             | Weight loss                                                            | 260-263.x                                                                                                                                                                        |                                                                                                                        |                            |
|                                                                       | 12                                             | Disorders of fluid, electrolyte, and acid-base balance                 | 276.x                                                                                                                                                                            |                                                                                                                        |                            |
|                                                                       | 13                                             | Gout                                                                   | 274.x                                                                                                                                                                            | M04AC01, M04AA, M04AB                                                                                                  |                            |
|                                                                       | 14                                             | Other disorders of endocrine, nutritional and metabolic diseases       | 240.x-242.x, 245.x, 246.x, 249.x, 251.x, 252.8, 252.9, 253.x-259.x, 264.x-269.x, 270.x, 271.x, 272.0, 272.1, 272.3, 272.5-272.9, 273.x, 275.x, 277.x, 278.1-278.8 (except 277.0) |                                                                                                                        |                            |
|                                                                       | 15                                             | Disorders involving the immune mechanisms                              | 279.x                                                                                                                                                                            |                                                                                                                        |                            |
|                                                                       | Diseases of the blood and blood-forming organs | 16                                                                     | Coagulation defects                                                                                                                                                              | 286.x                                                                                                                  | B02B                       |
|                                                                       |                                                | 17                                                                     | Autoimmune haemolytic anaemias, Other anaemias, Anaemias only tracked from drug therapy                                                                                          | 280.x-282.x, 283.1-283.9, 284.x-285.x                                                                                  | B03A, B03B, B03XA01, L03AA |
|                                                                       |                                                | 18                                                                     | Other diseases of the blood and blood-forming organs                                                                                                                             | 287.x-289.x                                                                                                            |                            |
| Mental disorders                                                      | 19                                             | Dementia / Alzheimer                                                   | 290.0-290.4x, 331.0x                                                                                                                                                             | N06DA, N06DX01                                                                                                         |                            |

|                                                 |    |                                                       |                                                                                                                                                                                                                                              |                                                                                                                                       |
|-------------------------------------------------|----|-------------------------------------------------------|----------------------------------------------------------------------------------------------------------------------------------------------------------------------------------------------------------------------------------------------|---------------------------------------------------------------------------------------------------------------------------------------|
|                                                 | 20 | Psychosis                                             | 295.x, 297.x, 298.2-298.9, 299.1x                                                                                                                                                                                                            | N05AD, N05AA, N05AB, N05AC, N05AX, N05AE, N05AF, N05AG, N05AH, N05AL                                                                  |
|                                                 | 21 | Depression                                            | 296.2, 296.3, 296.82, 298.0, 300.4, 301.12, 309.0x, 309.1x, 311.x                                                                                                                                                                            | N06A                                                                                                                                  |
|                                                 | 22 | Bipolar disorders                                     | 296.0x, 296.1x, 296.4x, 296.5x, 296.6x, 296.7x, 296.80, 296.81, 296.89, 296.9x, 298.1x                                                                                                                                                       | N05AN                                                                                                                                 |
|                                                 | 23 | Alcohol abuse                                         | 291.1, 291.2, 291.5, 291.8x, 291.9, 303.9, 305.0x, V11.3x                                                                                                                                                                                    | N07BB01                                                                                                                               |
|                                                 | 24 | Drug addiction                                        | 292.0x, 292.82-292.89, 292.9x, 304.x, 305.2x-305.9x                                                                                                                                                                                          | N07BB04                                                                                                                               |
|                                                 | 25 | Anxiety                                               | 300.0x                                                                                                                                                                                                                                       | N05BA, N05BB01, N05CD, N05BC01, N05BC51, N05BX, N05CF, N05CX01, N06BX                                                                 |
|                                                 | 26 | Other mental disorders                                | 290.8, 290.9, 291.0, 291.3, 291.4, 292.1x, 292.2, 292.81, 293.x, 294.x, 299.0x, 299.8x, 299.9x, 300.0x-300.2x, 300.3, 300.5-300.9, 301.0, 301.10, 301.11, 301.2x-301.9x, 302.x, 303.x, 305.1, 306.x-308.x, 309.2x-309.4x, 310.x, 312.x-319.x |                                                                                                                                       |
| Diseases of the nervous system and sense organs | 27 | Parkinson's disease and parkinsonism                  | 332.x                                                                                                                                                                                                                                        | N04                                                                                                                                   |
|                                                 | 28 | Multiple sclerosis                                    | 340                                                                                                                                                                                                                                          | L03AB07, L03AB08, L04AA23, L04AA27, L03AX13, L04AA31, L04AA34, L03AB13, L04AX07                                                       |
|                                                 | 29 | Epilepsy and recurrent seizures                       | 345.x                                                                                                                                                                                                                                        | N03AF01, N03AB02, N03AA02, N03AA03, N03AA04, N03AE01, N03AD01, N03AG01, N05BA09, N03AG04, N03AX10, N03AG06, N03AF02, N03AX14, N03AX15 |
|                                                 | 30 | Glaucoma                                              | 365.x                                                                                                                                                                                                                                        | S01E                                                                                                                                  |
|                                                 | 31 | Disorders of the eye and adnexa                       | 360.x-379.x (except 365.x)                                                                                                                                                                                                                   |                                                                                                                                       |
|                                                 | 32 | Diseases of the ear and mastoid process               | 380.x-389.x                                                                                                                                                                                                                                  |                                                                                                                                       |
|                                                 | 33 | Other diseases of the nervous system and sense organs | 320.x-326.x, 330.x-331.x, 333.x-337.x, 340.x-344.x, 346.x-359.x                                                                                                                                                                              |                                                                                                                                       |
| Diseases of the circulatory system              | 34 | Ischaemic Heart Disease/Angina                        | 410.x – 414                                                                                                                                                                                                                                  | C01DA, C01DX                                                                                                                          |
|                                                 | 35 | Heart failure                                         | 398.91, 402.11, 402.91, 404.11, 404.13, 404.91, 404.93, 428.x                                                                                                                                                                                |                                                                                                                                       |
|                                                 | 36 | Arrhythmia                                            | 426.10, 426.11, 426.13, 426.20-426.53, 426.60-426.89, 427.0, 427.2,                                                                                                                                                                          | C01BA, C01BC, C01BD                                                                                                                   |

|                                    |    |                                                                                                           |                                                                                                                                                                                                                                                                                                                                                                                                                                                                                                                                             |
|------------------------------------|----|-----------------------------------------------------------------------------------------------------------|---------------------------------------------------------------------------------------------------------------------------------------------------------------------------------------------------------------------------------------------------------------------------------------------------------------------------------------------------------------------------------------------------------------------------------------------------------------------------------------------------------------------------------------------|
|                                    |    | 427.31, 427.60, 427.9, 785.0x, V45.0x, V53.3x                                                             |                                                                                                                                                                                                                                                                                                                                                                                                                                                                                                                                             |
|                                    | 37 | Valvular diseases                                                                                         | 093.20-093.24, 394.0x-397.1x, 424.00-424.91, 746.3x-746.6x, V42.2x, V43.3x                                                                                                                                                                                                                                                                                                                                                                                                                                                                  |
|                                    | 38 | Vascular diseases                                                                                         | 440.x, 441.2, 441.4, 441.7, 441.9, 443.1x-443.9x, 447.1, 557.1x, 557.9x, 785.4x, V43.4x                                                                                                                                                                                                                                                                                                                                                                                                                                                     |
|                                    | 39 | Cerebrovascular diseases                                                                                  | 430.x-438.x                                                                                                                                                                                                                                                                                                                                                                                                                                                                                                                                 |
|                                    | 40 | Hypertension                                                                                              | 401.x-405.x                                                                                                                                                                                                                                                                                                                                                                                                                                                                                                                                 |
|                                    |    |                                                                                                           | C03AA, C03AB, C03AH, C03AX01, C02CA04, C03BA02, C03BA03, C03BA04, C03BA05, C03BA07, C03BA08, C03BA09, C03BA10, C03BA11, C03DB01, C03DB02, C03EA, C09BA02, C09BA03, C09BA04, C09BA05, C09BA06, C09BA07, C09BA08, C09BA09, C09BB, C09DB, C09DA01, C09DA02, C09DA03, C09DA04, C09DA06, C09DA07, C09DA08, C02AB01, C02AB02, C02AC01, C02AC02, C02AC04, C02AC05, C02DB02, C02DB03, C02DB04, C02DC01, C02DD01, C02DG01, C02KA01, C02KB01, C02KC01, C02KD01, C02KX01, C09XA B01AB, B01AX01, B01AD10, B01AD12, C04AD03, B01AC05 B01AA, B01AE, B01AF |
|                                    | 41 | Coronary and peripheral vascular disease                                                                  |                                                                                                                                                                                                                                                                                                                                                                                                                                                                                                                                             |
|                                    | 42 | Oral anticoagulant agents                                                                                 |                                                                                                                                                                                                                                                                                                                                                                                                                                                                                                                                             |
|                                    | 43 | Other diseases of the circulatory system                                                                  | 390.x-392.x, 393, 397.9, 398.90, 398.99, 411.8x, 412.x-417x, 420.x-423.x, 424.99, 425.x, 426.0, 426.12, 426.54, 426.9, 427.1, 427.32, 427.4x, 427.5, 427.61, 427.69, 427.8x, 429.x, 441.0x, 441.1, 441.3, 441.5, 441.6, 442.x, 443.0, 444.x-446.x, 447.0, 447.2-447.9, 448.x 451.x-459.x                                                                                                                                                                                                                                                    |
| Diseases of the respiratory system | 44 | Chronic Obstructive Pulmonary Disease, Asthma, Chronic respiratory disease only tracked from drug therapy | 490-492.x, 493.x, 494.x, 496 R03AA, R03AB, R03AC, R03DA, R03DB, R03DA20, R01AC01, R03BC01, R01AC51, S01GX01, S01GX51, R03BA                                                                                                                                                                                                                                                                                                                                                                                                                 |



|                                                              |    |                                                                                                                                            |                                                                                       |                                                                                                                                                                                             |
|--------------------------------------------------------------|----|--------------------------------------------------------------------------------------------------------------------------------------------|---------------------------------------------------------------------------------------|---------------------------------------------------------------------------------------------------------------------------------------------------------------------------------------------|
|                                                              | 45 | Acute respiratory infections                                                                                                               | 460-466.x                                                                             |                                                                                                                                                                                             |
|                                                              | 46 | Cystic Fibrosis                                                                                                                            | 277.0                                                                                 | R05CB, R05FB01, R05FA01, A09AA02, R07AX02, R07AX30, R07AX31                                                                                                                                 |
|                                                              | 47 | Other diseases of the respiratory system                                                                                                   | 470.x-478.x, 480.x-487.x, 495.x, 500.x-508.x, 510.x-519.x                             |                                                                                                                                                                                             |
| Diseases of the digestive system                             | 48 | Liver cirrhosis and other liver chronic diseases                                                                                           | 571.x, 573.x                                                                          | J05AP08, J05AP09, J05AP51, J05AP53, J05AP54, J05AP55, J05AP56, J05AP57, B05AA01 A07EC01, A07EC02, A07EC03, A07EC04                                                                          |
|                                                              | 49 | Inflammatory bowel diseases (Ulcerative colitis and Chron's disease)                                                                       | 555.x-556.x                                                                           |                                                                                                                                                                                             |
|                                                              | 50 | Chronic and acute pancreatitis                                                                                                             | 577.0-577.1                                                                           |                                                                                                                                                                                             |
|                                                              | 51 | Other diseases of the digestive system                                                                                                     | 520.x-553.x, 557.x-570, 572.x, 574.x-576.x, 577.2-577.9, 578.x, 579.x                 |                                                                                                                                                                                             |
| Diseases of the genitourinary system                         | 52 | Chronic kidney disease                                                                                                                     | 585, V45.1, V56.x, V03AE                                                              |                                                                                                                                                                                             |
|                                                              | 53 | Other kidney disorders                                                                                                                     | 580.x-584.x, 586, 587, 588.x-589.x                                                    |                                                                                                                                                                                             |
|                                                              | 54 | Other diseases of the genitourinary system                                                                                                 | 590.x-608.x, 610.x, 611.x, 614.x-629.x                                                |                                                                                                                                                                                             |
| Diseases of the skin and subcutaneous tissues                | 55 | Diseases of the skin and subcutaneous tissues, including No rheumatoid psoriasis                                                           | 680.x-686.x, 690.x-695.x, 696.0, 696.2-696.5, 696.8, 697.x, 698.x, 700.x-709.x, 696.1 | D05BB01, D05BB02, D05AX                                                                                                                                                                     |
| Diseases of the musculoskeletal system and connective tissue | 56 | Autoimmune disease (Rheumatoid arthritis, Rheumatoid psoriasis, Anchylosing spondylitis, Systemic sclerosis, Systemic lupus erythematosus) | 714.0, 696.0, 720.0, 710.1x, 710.0x                                                   |                                                                                                                                                                                             |
|                                                              | 57 | Other diseases of the musculoskeletal system and connective tissue                                                                         | 710.2-710.9, 711.x-713.x, 714.1x, 714.9x, 715.x-719.x, 720.1x-720.9x, 721.x-739.x     |                                                                                                                                                                                             |
| Symptoms, signs and ill-defined conditions                   | 58 | Symptoms, signs and ill-defined conditions                                                                                                 | 780-799                                                                               |                                                                                                                                                                                             |
| Other conditions                                             | 59 | Transplantation                                                                                                                            | V42                                                                                   | L04AA01, L04AA02, L04AA03, L04AA04, L04AA05, L04AA06, L04AA08, L04AA09, L04AA10, L04AA11, L04AA12, L04AA14, L04AA15, L04AA16, L04AA17, L04AA18, L04AA19, L04AA21, L04AD01, L04AD02, L04AX01 |

1  
2  
3  
4  
5  
6  
7  
8  
9  
10  
11  
12  
13  
14  
15  
16  
17  
18  
19  
20  
21  
22  
23  
24  
25  
26  
27  
28  
29  
30  
31  
32  
33  
34  
35  
36  
37  
38  
39  
40  
41  
42  
43  
44  
45  
46

|    |                 |              |                                                                              |
|----|-----------------|--------------|------------------------------------------------------------------------------|
| 60 | Chronic pain    | 338.2, 338.4 | N02AA01, N02AG01, N02AE01,<br>N02AB03, N02AA05, N02AA55,<br>N02AA03, N02AX06 |
| 61 | Corticosteroids |              | H02                                                                          |

For peer review only

**The RECORD statement – checklist of items, extended from the STROBE statement, that should be reported in observational studies using routinely collected health data.**

|                           | Item No. | STROBE items                                                                                                                                                                               | Location in manuscript where items are reported | RECORD items                                                                                                                                                                                                                                                                                                                                                                                                                                | Location in manuscript where items are reported |
|---------------------------|----------|--------------------------------------------------------------------------------------------------------------------------------------------------------------------------------------------|-------------------------------------------------|---------------------------------------------------------------------------------------------------------------------------------------------------------------------------------------------------------------------------------------------------------------------------------------------------------------------------------------------------------------------------------------------------------------------------------------------|-------------------------------------------------|
| <b>Title and abstract</b> |          |                                                                                                                                                                                            |                                                 |                                                                                                                                                                                                                                                                                                                                                                                                                                             |                                                 |
|                           | 1        | (a) Indicate the study's design with a commonly used term in the title or the abstract (b) Provide in the abstract an informative and balanced summary of what was done and what was found |                                                 | RECORD 1.1: The type of data used should be specified in the title or abstract. When possible, the name of the databases used should be included.<br><br>RECORD 1.2: If applicable, the geographic region and timeframe within which the study took place should be reported in the title or abstract.<br><br>RECORD 1.3: If linkage between databases was conducted for the study, this should be clearly stated in the title or abstract. | Page 1-5                                        |
| <b>Introduction</b>       |          |                                                                                                                                                                                            |                                                 |                                                                                                                                                                                                                                                                                                                                                                                                                                             |                                                 |
| Background rationale      | 2        | Explain the scientific background and rationale for the investigation being reported                                                                                                       |                                                 |                                                                                                                                                                                                                                                                                                                                                                                                                                             | 7                                               |
| Objectives                | 3        | State specific objectives, including any prespecified hypotheses                                                                                                                           |                                                 |                                                                                                                                                                                                                                                                                                                                                                                                                                             | 8                                               |
| <b>Methods</b>            |          |                                                                                                                                                                                            |                                                 |                                                                                                                                                                                                                                                                                                                                                                                                                                             |                                                 |
| Study Design              | 4        | Present key elements of study design early in the paper                                                                                                                                    |                                                 |                                                                                                                                                                                                                                                                                                                                                                                                                                             | 9-11                                            |
| Setting                   | 5        | Describe the setting, locations, and relevant dates, including periods of recruitment, exposure, follow-up, and data collection                                                            |                                                 |                                                                                                                                                                                                                                                                                                                                                                                                                                             | 8                                               |

|                                                                                                                                                                                                            |          |                                                                                                                                                                                                                                                                                                                                                                                                                                                                                                                                                                                                                                                                                                                        |  |                                                                                                                                                                                                                                                                                                                                                                                                                                                                                                                                                                                                                                                                                                      |             |
|------------------------------------------------------------------------------------------------------------------------------------------------------------------------------------------------------------|----------|------------------------------------------------------------------------------------------------------------------------------------------------------------------------------------------------------------------------------------------------------------------------------------------------------------------------------------------------------------------------------------------------------------------------------------------------------------------------------------------------------------------------------------------------------------------------------------------------------------------------------------------------------------------------------------------------------------------------|--|------------------------------------------------------------------------------------------------------------------------------------------------------------------------------------------------------------------------------------------------------------------------------------------------------------------------------------------------------------------------------------------------------------------------------------------------------------------------------------------------------------------------------------------------------------------------------------------------------------------------------------------------------------------------------------------------------|-------------|
| <p>1<br/>2<br/>3<br/>4<br/>5<br/>6<br/>7<br/>8<br/>9<br/>10<br/>11<br/>12<br/>13<br/>14<br/>15<br/>16<br/>17<br/>18<br/>19<br/>20<br/>21<br/>22<br/>23<br/>24<br/>25<br/>26<br/>27</p> <p>Participants</p> | <p>6</p> | <p>(a) <i>Cohort study</i> - Give the eligibility criteria, and the sources and methods of selection of participants. Describe methods of follow-up<br/> <i>Case-control study</i> - Give the eligibility criteria, and the sources and methods of case ascertainment and control selection. Give the rationale for the choice of cases and controls<br/> <i>Cross-sectional study</i> - Give the eligibility criteria, and the sources and methods of selection of participants</p> <p>(b) <i>Cohort study</i> - For matched studies, give matching criteria and number of exposed and unexposed<br/> <i>Case-control study</i> - For matched studies, give matching criteria and the number of controls per case</p> |  | <p>RECORD 6.1: The methods of study population selection (such as codes or algorithms used to identify subjects) should be listed in detail. If this is not possible, an explanation should be provided.</p> <p>RECORD 6.2: Any validation studies of the codes or algorithms used to select the population should be referenced. If validation was conducted for this study and not published elsewhere, detailed methods and results should be provided.</p> <p>RECORD 6.3: If the study involved linkage of databases, consider use of a flow diagram or other graphical display to demonstrate the data linkage process, including the number of individuals with linked data at each stage.</p> | <p>8-11</p> |
| <p>28<br/>29<br/>30<br/>31<br/>32<br/>33<br/>34</p> <p>Variables</p>                                                                                                                                       | <p>7</p> | <p>Clearly define all outcomes, exposures, predictors, potential confounders, and effect modifiers. Give diagnostic criteria, if applicable.</p>                                                                                                                                                                                                                                                                                                                                                                                                                                                                                                                                                                       |  | <p>RECORD 7.1: A complete list of codes and algorithms used to classify exposures, outcomes, confounders, and effect modifiers should be provided. If these cannot be reported, an explanation should be provided.</p>                                                                                                                                                                                                                                                                                                                                                                                                                                                                               | <p>9</p>    |
| <p>35<br/>36<br/>37<br/>38<br/>39<br/>40<br/>41<br/>42</p> <p>Data sources/<br/>measurement</p>                                                                                                            | <p>8</p> | <p>For each variable of interest, give sources of data and details of methods of assessment (measurement). Describe comparability of assessment methods if there is more than one group</p>                                                                                                                                                                                                                                                                                                                                                                                                                                                                                                                            |  |                                                                                                                                                                                                                                                                                                                                                                                                                                                                                                                                                                                                                                                                                                      | <p>9</p>    |

|                                                                                                                                              |                                  |    |                                                                                                                                                                                                                                                                                                                                                                                                                                                                                                                                                                      |                                                                                                                                                       |      |
|----------------------------------------------------------------------------------------------------------------------------------------------|----------------------------------|----|----------------------------------------------------------------------------------------------------------------------------------------------------------------------------------------------------------------------------------------------------------------------------------------------------------------------------------------------------------------------------------------------------------------------------------------------------------------------------------------------------------------------------------------------------------------------|-------------------------------------------------------------------------------------------------------------------------------------------------------|------|
| 1<br>2<br>3<br>4<br>5<br>6<br>7<br>8<br>9<br>10                                                                                              | Bias                             | 9  | Describe any efforts to address potential sources of bias                                                                                                                                                                                                                                                                                                                                                                                                                                                                                                            |                                                                                                                                                       | 9-11 |
| 11<br>12<br>13<br>14<br>15<br>16<br>17<br>18<br>19<br>20<br>21<br>22<br>23<br>24<br>25<br>26<br>27<br>28<br>29<br>30<br>31<br>32<br>33<br>34 | Study size                       | 10 | Explain how the study size was arrived at                                                                                                                                                                                                                                                                                                                                                                                                                                                                                                                            |                                                                                                                                                       | 8-11 |
| 35<br>36<br>37<br>38<br>39<br>40<br>41<br>42<br>43<br>44<br>45<br>46<br>47                                                                   | Quantitative variables           | 11 | Explain how quantitative variables were handled in the analyses. If applicable, describe which groupings were chosen, and why                                                                                                                                                                                                                                                                                                                                                                                                                                        |                                                                                                                                                       | 9,10 |
|                                                                                                                                              | Statistical methods              | 12 | (a) Describe all statistical methods, including those used to control for confounding<br>(b) Describe any methods used to examine subgroups and interactions<br>(c) Explain how missing data were addressed<br>(d) <i>Cohort study</i> - If applicable, explain how loss to follow-up was addressed<br><i>Case-control study</i> - If applicable, explain how matching of cases and controls was addressed<br><i>Cross-sectional study</i> - If applicable, describe analytical methods taking account of sampling strategy<br>(e) Describe any sensitivity analyses |                                                                                                                                                       | 9-11 |
|                                                                                                                                              | Data access and cleaning methods |    | ..                                                                                                                                                                                                                                                                                                                                                                                                                                                                                                                                                                   | RECORD 12.1: Authors should describe the extent to which the investigators had access to the database population used to create the study population. | 8-11 |

|                  |    |                                                                                                                                                                                                                                                                                                                                                 |  |                                                                                                                                                                                                                                                                                                                    |       |
|------------------|----|-------------------------------------------------------------------------------------------------------------------------------------------------------------------------------------------------------------------------------------------------------------------------------------------------------------------------------------------------|--|--------------------------------------------------------------------------------------------------------------------------------------------------------------------------------------------------------------------------------------------------------------------------------------------------------------------|-------|
|                  |    |                                                                                                                                                                                                                                                                                                                                                 |  | RECORD 12.2: Authors should provide information on the data cleaning methods used in the study.                                                                                                                                                                                                                    |       |
| Linkage          |    | ..                                                                                                                                                                                                                                                                                                                                              |  | RECORD 12.3: State whether the study included person-level, institutional-level, or other data linkage across two or more databases. The methods of linkage and methods of linkage quality evaluation should be provided.                                                                                          | 8,9   |
| <b>Results</b>   |    |                                                                                                                                                                                                                                                                                                                                                 |  |                                                                                                                                                                                                                                                                                                                    |       |
| Participants     | 13 | (a) Report the numbers of individuals at each stage of the study ( <i>e.g.</i> , numbers potentially eligible, examined for eligibility, confirmed eligible, included in the study, completing follow-up, and analysed)<br>(b) Give reasons for non-participation at each stage.<br>(c) Consider use of a flow diagram                          |  | RECORD 13.1: Describe in detail the selection of the persons included in the study ( <i>i.e.</i> , study population selection) including filtering based on data quality, data availability and linkage. The selection of included persons can be described in the text and/or by means of the study flow diagram. | 11,12 |
| Descriptive data | 14 | (a) Give characteristics of study participants ( <i>e.g.</i> , demographic, clinical, social) and information on exposures and potential confounders<br>(b) Indicate the number of participants with missing data for each variable of interest<br>(c) <i>Cohort study</i> - summarise follow-up time ( <i>e.g.</i> , average and total amount) |  |                                                                                                                                                                                                                                                                                                                    | 11,12 |
| Outcome data     | 15 | <i>Cohort study</i> - Report numbers of outcome events or summary measures over time<br><i>Case-control study</i> - Report numbers in each exposure                                                                                                                                                                                             |  |                                                                                                                                                                                                                                                                                                                    | 11,12 |

|                   |    |                                                                                                                                                                                                                                                                                                                                                                                                                 |  |                                                                                                                                                                                                                                                                                                          |       |
|-------------------|----|-----------------------------------------------------------------------------------------------------------------------------------------------------------------------------------------------------------------------------------------------------------------------------------------------------------------------------------------------------------------------------------------------------------------|--|----------------------------------------------------------------------------------------------------------------------------------------------------------------------------------------------------------------------------------------------------------------------------------------------------------|-------|
|                   |    | category, or summary measures of exposure<br><i>Cross-sectional study</i> - Report numbers of outcome events or summary measures                                                                                                                                                                                                                                                                                |  |                                                                                                                                                                                                                                                                                                          |       |
| Main results      | 16 | (a) Give unadjusted estimates and, if applicable, confounder-adjusted estimates and their precision (e.g., 95% confidence interval). Make clear which confounders were adjusted for and why they were included<br>(b) Report category boundaries when continuous variables were categorized<br>(c) If relevant, consider translating estimates of relative risk into absolute risk for a meaningful time period |  |                                                                                                                                                                                                                                                                                                          | 11,12 |
| Other analyses    | 17 | Report other analyses done— e.g., analyses of subgroups and interactions, and sensitivity analyses                                                                                                                                                                                                                                                                                                              |  |                                                                                                                                                                                                                                                                                                          | 11,12 |
| <b>Discussion</b> |    |                                                                                                                                                                                                                                                                                                                                                                                                                 |  |                                                                                                                                                                                                                                                                                                          |       |
| Key results       | 18 | Summarise key results with reference to study objectives                                                                                                                                                                                                                                                                                                                                                        |  |                                                                                                                                                                                                                                                                                                          | 12,13 |
| Limitations       | 19 | Discuss limitations of the study, taking into account sources of potential bias or imprecision. Discuss both direction and magnitude of any potential bias                                                                                                                                                                                                                                                      |  | RECORD 19.1: Discuss the implications of using data that were not created or collected to answer the specific research question(s). Include discussion of misclassification bias, unmeasured confounding, missing data, and changing eligibility over time, as they pertain to the study being reported. | 15,16 |
| Interpretation    | 20 | Give a cautious overall interpretation of results considering objectives,                                                                                                                                                                                                                                                                                                                                       |  |                                                                                                                                                                                                                                                                                                          | 13-15 |

|                                                           |    |                                                                                                                                                               |  |                                                                                                                                                          |    |
|-----------------------------------------------------------|----|---------------------------------------------------------------------------------------------------------------------------------------------------------------|--|----------------------------------------------------------------------------------------------------------------------------------------------------------|----|
|                                                           |    | limitations, multiplicity of analyses, results from similar studies, and other relevant evidence                                                              |  |                                                                                                                                                          |    |
| Generalisability                                          | 21 | Discuss the generalisability (external validity) of the study results                                                                                         |  |                                                                                                                                                          | 15 |
| <b>Other Information</b>                                  |    |                                                                                                                                                               |  |                                                                                                                                                          |    |
| Funding                                                   | 22 | Give the source of funding and the role of the funders for the present study and, if applicable, for the original study on which the present article is based |  |                                                                                                                                                          | 17 |
| Accessibility of protocol, raw data, and programming code |    | ..                                                                                                                                                            |  | RECORD 22.1: Authors should provide information on how to access any supplemental information such as the study protocol, raw data, or programming code. | 18 |

\*Reference: Benchimol EI, Smeeth L, Guttman A, Harron K, Moher D, Petersen I, Sørensen HT, von Elm E, Langan SM, the RECORD Working Committee. The REporting of studies Conducted using Observational Routinely-collected health Data (RECORD) Statement. *PLoS Medicine* 2015; in press.

\*Checklist is protected under Creative Commons Attribution ([CC BY](https://creativecommons.org/licenses/by/4.0/)) license.



# BMJ Open

## Stratification of the risk of developing severe or lethal Covid-19 by a new score from a large Italian population

|                                 |                                                                                                                                                                                                                                                                                                                                                                                                                                                                                                                                                                                                                                                                                                                                                                                                                                                                                                                                                                                                                                                                                                                                                                                                                                                                                                                                     |
|---------------------------------|-------------------------------------------------------------------------------------------------------------------------------------------------------------------------------------------------------------------------------------------------------------------------------------------------------------------------------------------------------------------------------------------------------------------------------------------------------------------------------------------------------------------------------------------------------------------------------------------------------------------------------------------------------------------------------------------------------------------------------------------------------------------------------------------------------------------------------------------------------------------------------------------------------------------------------------------------------------------------------------------------------------------------------------------------------------------------------------------------------------------------------------------------------------------------------------------------------------------------------------------------------------------------------------------------------------------------------------|
| Journal:                        | <i>BMJ Open</i>                                                                                                                                                                                                                                                                                                                                                                                                                                                                                                                                                                                                                                                                                                                                                                                                                                                                                                                                                                                                                                                                                                                                                                                                                                                                                                                     |
| Manuscript ID                   | bmjopen-2021-053281.R2                                                                                                                                                                                                                                                                                                                                                                                                                                                                                                                                                                                                                                                                                                                                                                                                                                                                                                                                                                                                                                                                                                                                                                                                                                                                                                              |
| Article Type:                   | Original research                                                                                                                                                                                                                                                                                                                                                                                                                                                                                                                                                                                                                                                                                                                                                                                                                                                                                                                                                                                                                                                                                                                                                                                                                                                                                                                   |
| Date Submitted by the Author:   | 21-Oct-2021                                                                                                                                                                                                                                                                                                                                                                                                                                                                                                                                                                                                                                                                                                                                                                                                                                                                                                                                                                                                                                                                                                                                                                                                                                                                                                                         |
| Complete List of Authors:       | Corrao, Giovanni; Università degli Studi di Milano-Bicocca<br>Rea, Federico; University of Milan-Bicocca<br>Carle, Flavia; Polytechnic University of Marche<br>Scondotto, Salvatore; Department of Epidemiologic Observatory, Health Department of Sicily<br>Allotta, Alessandra; Regional Health Authority, Department of Health Services and Epidemiological Observatory<br>Lepore, Vito; Regional Health Agency of Puglia<br>D'Ettorre, Antonio; Regional Health Agency of Puglia<br>Tanzarella, Cinzia; Regional Health Agency of Puglia<br>Vittori, Patrizia; Regional Health Authority<br>Abena, Sabrina; Regional Health Authority<br>Iommi, Marica; Polytechnic University of Marche<br>Spazzafumo, Liana; Regional Health Agency of Marche<br>Ercolanoni, Michele; Regional Welfare Service<br>Blaco, Roberto; Regional Welfare Service<br>Carbone, Simona; Italian Health Ministry, Department of Health Planning<br>Giordani, Cristina; Italian Health Ministry, Department of Health Planning<br>Manfellotto, Dario; Hospital Fatebenefratelli - AFaR, Department of Internal Medicine<br>Galli, Massimo; University of Milan L. Sacco Hospital, Institute of Tropical and Infectious Diseases<br>Mancia, Giuseppe; University of Milano-Bicocca, Clinical Medicine and Prevention; Ospedale San Gerardo, Clinia Medica |
| <b>Primary Subject Heading</b>: | Public health                                                                                                                                                                                                                                                                                                                                                                                                                                                                                                                                                                                                                                                                                                                                                                                                                                                                                                                                                                                                                                                                                                                                                                                                                                                                                                                       |
| Secondary Subject Heading:      | Epidemiology, Health services research                                                                                                                                                                                                                                                                                                                                                                                                                                                                                                                                                                                                                                                                                                                                                                                                                                                                                                                                                                                                                                                                                                                                                                                                                                                                                              |
| Keywords:                       | COVID-19, Health policy < HEALTH SERVICES ADMINISTRATION & MANAGEMENT, PUBLIC HEALTH                                                                                                                                                                                                                                                                                                                                                                                                                                                                                                                                                                                                                                                                                                                                                                                                                                                                                                                                                                                                                                                                                                                                                                                                                                                |
|                                 |                                                                                                                                                                                                                                                                                                                                                                                                                                                                                                                                                                                                                                                                                                                                                                                                                                                                                                                                                                                                                                                                                                                                                                                                                                                                                                                                     |

SCHOLARONE™  
Manuscripts



I, the Submitting Author has the right to grant and does grant on behalf of all authors of the Work (as defined in the below author licence), an exclusive licence and/or a non-exclusive licence for contributions from authors who are: i) UK Crown employees; ii) where BMJ has agreed a CC-BY licence shall apply, and/or iii) in accordance with the terms applicable for US Federal Government officers or employees acting as part of their official duties; on a worldwide, perpetual, irrevocable, royalty-free basis to BMJ Publishing Group Ltd ("BMJ") its licensees and where the relevant Journal is co-owned by BMJ to the co-owners of the Journal, to publish the Work in this journal and any other BMJ products and to exploit all rights, as set out in our [licence](#).

The Submitting Author accepts and understands that any supply made under these terms is made by BMJ to the Submitting Author unless you are acting as an employee on behalf of your employer or a postgraduate student of an affiliated institution which is paying any applicable article publishing charge ("APC") for Open Access articles. Where the Submitting Author wishes to make the Work available on an Open Access basis (and intends to pay the relevant APC), the terms of reuse of such Open Access shall be governed by a Creative Commons licence – details of these licences and which [Creative Commons](#) licence will apply to this Work are set out in our licence referred to above.

Other than as permitted in any relevant BMJ Author's Self Archiving Policies, I confirm this Work has not been accepted for publication elsewhere, is not being considered for publication elsewhere and does not duplicate material already published. I confirm all authors consent to publication of this Work and authorise the granting of this licence.

**Stratification of the risk of developing severe or lethal Covid-19 by a new score from a large Italian population**

Giovanni Corrao, PhD<sup>1,2</sup>, Federico Rea, PhD<sup>1,2</sup>, Flavia Carle, PhD<sup>1,3</sup>, Salvatore Scondotto, PhD<sup>1,4</sup>,  
 Alessandra Allotta, MSc<sup>4</sup>, Vito Lepore, MD<sup>5</sup>, Antonio D’Ettorre, MSc<sup>5</sup>, Cinzia Tanzarella, MSc<sup>5</sup>,  
 Patrizia Vittori, MSc<sup>6</sup>, Sabrina Abena, MSc<sup>6</sup>, Marica Iommi, PhD<sup>3</sup>, Liana Spazzafumo, MSc<sup>1,7</sup>,  
 Michele Ercolanoni, MSc<sup>8,9</sup>, Roberto Blaco, MSc<sup>9</sup>, Simona Carbone, MSc<sup>10</sup>, Cristina Giordani,  
 MSc<sup>10</sup>, Dario Manfellotto, MD<sup>11</sup>, Massimo Galli, MD<sup>12,13</sup>, Giuseppe Mancina, MD<sup>14,15</sup> on behalf of  
 the “Monitoring and Assessing care Pathways (MAP)” working group of the Italian Ministry of  
 Health

<sup>1</sup> National Centre for Healthcare Research and Pharmacoepidemiology, University of Milano-Bicocca, Milan, Italy

<sup>2</sup> Unit of Biostatistics, Epidemiology and Public Health, Department of Statistics and Quantitative Methods, University of Milano-Bicocca, Milan, Italy

<sup>3</sup> Center of Epidemiology and Biostatistics, Polytechnic University of Marche, Ancona, Italy

<sup>4</sup> Department of Health Services and Epidemiological Observatory, Regional Health Authority, Sicily Region, Palermo, Italy

<sup>5</sup> Regional Health Agency of Puglia (Agenzia regionale socio-sanitaria), Bari, Italy

<sup>6</sup> Regional Unit of Epidemiology and Social Policies, Regional Health Authority, Valle D’Aosta Region, Aosta, Italy

<sup>7</sup> Regional Health Agency of Marche, Ancona, Italy

<sup>8</sup> ARIA S.p.a., Milan, Italy

<sup>9</sup> Epidemiologic Observatory, Regional Welfare Service, Lombardy Region, Milan, Italy

<sup>10</sup> Department of Health Planning, Italian Health Ministry, Rome, Italy

<sup>11</sup> Department of Internal Medicine, Hospital Fatebenefratelli - AFaR, Isola Tiberina, Rome, Italy

<sup>12</sup> Infectious Diseases Unit, Luigi Sacco Hospital, Milan, Italy

<sup>13</sup> Department of Biomedical and Clinical Sciences, University of Milan, Milan, Italy

<sup>14</sup> Emeritus Professor, University of Milano-Bicocca, Milan, Italy

<sup>15</sup> Policlinico di Monza, Monza, Italy

1  
2  
3  
4  
5  
6  
7  
8  
9  
10  
11  
12  
13  
14  
15  
16  
17  
18  
19  
20  
21  
22  
23  
24  
25  
26  
27  
28  
29  
30  
31  
32  
33  
34  
35  
36  
37  
38  
39  
40  
41  
42  
43  
44  
45  
46  
47  
48  
49  
50  
51  
52  
53  
54  
55  
56  
57  
58  
59  
60

1 Word count (manuscript): 3,165

2 Tables: 1

3 Figures: 3

4 **Address for correspondence:** Prof. Giovanni Corrao, Dipartimento di Statistica e Metodi  
5 Quantitativi, Università degli Studi di Milano-Bicocca, Via Bicocca degli Arcimboldi, 8, Edificio  
6 U7, 20126 Milano, Italy. Tel.: +39.02.64485854; E-mail: giovanni.corrao@unimib.it

For peer review only

1  
2  
3 1 “Monitoring and Assessing care Pathways” MAP working group (Italian Health Ministry, Health  
4 2 Planning Dept):

- 5 3 • Italian Ministry of Health, Dept of Health Planning: Donata Bellentani, Simona Carbone  
6 4 (coordinator), Carla Ceccolini, Angela De Feo, Cristina Giordani, Rosanna Mariniello,  
7 5 Modesta Visca; Dept of health prevention: Natalia Magliocchetti, Giovanna Romano;  
8 6 External Expert: Antonio Lora, Paola Pisanti, Rinaldo Zanini.
- 9 7 • Polytechnic University of Marche (coordinator): Flavia Carle, Marica Iommi, Edlira  
10 8 Skrami.
- 11 9 • University of Milano-Bicocca, Laboratory of Healthcare Research &  
12 10 Pharmacoepidemiology: Anna Cantarutti, Giovanni Corrao, Matteo Monzio  
13 11 Compagnoni, Pietro Pagni, Federico Rea.
- 14 12 • Department of Epidemiology Lazio Region: Marina Davoli, Mirko Di Martino, Adele  
15 13 Lallo.
- 16 14 • Aosta Valley Region: Patrizia Vittori, Giuliana Vuillermin
- 17 15 • Campania Region: Alfonso Bernardo, Anna Frusciante
- 18 16 • Emilia Romagna Region: Laura Belotti, Rossana De Palma.
- 19 17 • Friuli Venezia Giulia Region: Andrea Di Lenarda, Marisa Prezza
- 20 18 • Lazio Region: Danilo Fusco, Chiara Marinacci
- 21 19 • Lombardy Region: Roberto Blaco, Olivia Leoni
- 22 20 • Marche Region: Liana Spazzafumo, Simone Pizzi
- 23 21 • Molise Region: Lolita Gallo
- 24 22 • Puglia Region: Ettore Attolini, Vito Lepore
- 25 23 • Sicily Region: Salvatore Scodotto, Giovanni De Luca
- 26 24 • Tuscany Region: Paolo Francesconi, Carla Rizzuti
- 27 25 • Veneto Region: Francesco Avossa, Silvia Vigna
- 28 26 • Research and Health Foundation (Fondazione ReS -Ricerca e Salute-): Letizia Dondi,  
29 27 Nello Martini, Antonella Pedrini, Carlo Piccinni
- 30 28 • National Agency for Regional Health Services: Mimma Cosentino, Maria Grazia  
31 29 Marvulli
- 32 30 • ANMCO (National Association of Hospital Cardiologists) Study Center: Aldo Maggioni

## Abstract

**Objectives.** To develop a population-based risk stratification model (Covid-Vulnerability Score) for predicting severe/fatal clinical manifestations of SARS-CoV-2 infection, using the multiple source information provided by the healthcare utilization databases of the Italian National Health Service.

**Design.** Retrospective observational cohort study.

**Setting.** Population-based study using the healthcare utilization database from five Italian regions.

**Participants.** Beneficiaries of the National Health Service, aged 18-79 years, who had the residency in the five participating regions. Residents in a nursing home were not included. The model was built from the 7,655,502 residents of Lombardy Region.

**Main outcome measure.** The score included gender, age and 29 conditions/diseases selected from a list of 61 conditions which independently predicted the primary outcome, i.e., severe (intensive care unit admission) or fatal manifestation of Covid-19 experienced during the first epidemic wave (until June 2020). The score performance was validated by applying the model to several validation sets, i.e. Lombardy population (second epidemic wave), and the other four Italian regions (entire 2020) for a total of about 15.4 million individuals and 7,031 outcomes. Predictive performance was assessed by discrimination (areas under the Receiver Operating Characteristic curve) and calibration (plot of observed vs. predicted outcomes).

**Results.** We observed a clear positive trend towards increasing outcome incidence as the score increased. The areas under the Receiver Operating Characteristic curve of the Covid-Vulnerability Score ranged from 0.85 to 0.88, which compared favourably with the areas of generic scores such as the Charlson Comorbidity Score (0.60). A remarkable performance of the score on the calibration of observed and predicted outcome probability was also observed.

1  
2  
3 1 **Conclusions.** A score based on data used for public health management accurately predicted the  
4  
5 2 occurrence of severe/fatal manifestations of Covid-19. Use of this score may help health decision-  
6  
7 3 makers to more accurately identify high-risk citizens who need early preventive or treatment  
8  
9 4 interventions.  
10  
11  
12  
13  
14 5  
15  
16  
17  
18  
19  
20  
21  
22  
23  
24  
25  
26  
27  
28  
29  
30  
31  
32  
33  
34  
35  
36  
37  
38  
39  
40  
41  
42  
43  
44  
45  
46  
47  
48  
49  
50  
51  
52  
53  
54  
55  
56  
57  
58  
59  
60

For peer review only

### Strengths and limitations of this study

- The Covid-Vulnerability Score (CVS), based on demographic (age and gender) and clinical (29 conditions and diseases) predictors of the Covid-19 severity, may be easily obtained from electronic health databases covering beneficiaries of the National Health Service.
- The CVS was developed and validated on a large (more than 15 million Italian individuals) and unselected population.
- The CVS was validated across different temporal (first and second epidemic wave) and geographic (five Italian regions) conditions.
- Predictors were restricted to those routinely collected and available in the Italian administrative databases. Thus, education, functional status, and socioeconomic information were not included.



## Introduction

The pandemic spread of the SARS-CoV-2 virus has dramatically exceeded the diagnostic and treatment capabilities of virtually all countries around the world. This has fuelled a debate on the need to establish priority criteria that might identify Covid-19 patients at greater risk to progress to hospitalization or a fatal event, in order to make them the preferential recipients of currently available effective treatment strategies, the goal being to reduce the number of deaths and prevent collapse of hospital facilities. The problem involves who should receive early diagnostic testing, who can be treated outside hospital among infected people, who should be given new, sometimes expensive and necessarily rationed drugs (e.g., monoclonal antibodies [1]) and who should be selected for early vaccination. The case of vaccination is particularly delicate because demand will outstrip supply for many months ahead in low- and middle-income countries.

Associations between certain chronic diseases and conditions and serious/critical/fatal clinical manifestations of the SARS-CoV-2 infection have been reported from several studies [2-4], which potentially helps to identify the multiple prognostic factors that are involved in the Covid-19 disease. However, although some factors have been accepted as “established” by the scientific community, their overall predictive value has not been robustly evaluated [5]. It should also be considered that basing predictions on a list of individual conditions or diseases does not take into account that comorbidities can make the global risk different from that predictable by individual contributions. Finally, some predictive scores have been developed and validated in hospital care settings [6,7], their use requiring specialized image acquisition or sophisticated laboratory examinations, which may not be readily applicable in a population context. A valuable goal would therefore be to develop a score that could reliably predict the risk of progression of Covid-19 to severe or lethal forms, using simple and easily collectable information.

Our population-based study was performed under the auspices of the Italian Health Ministry. We aimed to develop and validate a novel score predictive of severe/fatal clinical manifestations of

1  
2  
3 1 the SARS-CoV-2 infection using the multiple source information provided by the healthcare  
4  
5 2 utilization databases of the Italian National Health Service (NHS).  
6  
7  
8

## 9 3 **Methods**

### 10 4 **Setting**

11  
12  
13  
14  
15 5 This study was based on the NHS beneficiaries of five Italian regions that voluntarily joined the  
16  
17 6 protocol and contributed to the data collection. The regions are located in Northern (Valle d'Aosta  
18  
19 7 and Lombardy), Central (Marche), Southern (Puglia) Italy and in the Italian islands (Sicily).  
20  
21  
22 8 Overall, the data covered nearly 20.5 million people (34% of the entire Italian population) who  
23  
24 9 during 2020 experienced 712,408 cases of Covid-19, with a total of 31,957 deaths. Selected  
25  
26 10 features of the participating regions are reported in supplementary **Table S1**.  
27  
28

### 29 11 **Data sources**

30  
31  
32 12 All Italian citizens have equal access to healthcare services provided by the NHS. Computerized  
33  
34 13 information systems on the provided services have been created within each of the 21 Italian  
35  
36 14 regions and autonomous Provinces, the related regional health care databases including 1)  
37  
38 15 demographic and administrative data of residents who receive NHS assistance (the NHS  
39  
40 16 beneficiaries, practically coinciding with the entire resident population); 2) hospital discharge  
41  
42 17 records reporting information on the primary diagnosis, as well as on up to five coexisting  
43  
44 18 conditions and procedures, coded according to the International Classification of Diseases, 9th  
45  
46 19 Revision, Clinical Modification (ICD-9-CM) classification system (<http://icd9.chrisendres.com/>);  
47  
48 20 and 3) drug prescriptions reimbursed by the NHS, coded according to the Anatomical Therapeutic  
49  
50 21 Chemical (ATC) classification system ([https://www.whocc.no/atc\\_ddd\\_index/](https://www.whocc.no/atc_ddd_index/)). Since the starting  
51  
52 22 of the Covid-19 pandemic, almost all regions established, with the coordination of the National  
53  
54 23 Health Institute, a population-based registry of patients with a confirmed diagnosis of infection  
55  
56 24 with the SARS-CoV-2 virus, and, among these, those who were admitted to Intensive Care Units  
57  
58  
59  
60

1  
2  
3 1 or died. In the present study, these various types of data were interconnected by using for each  
4  
5 2 citizen a single identification code in all databases. To preserve privacy, each identification code  
6  
7 3 was automatically deidentified. Analyses of the regional databases were performed under the rule  
8  
9 4 that the inverse process, i.e. patient identification, was allowed only to the Regional Health  
10  
11 5 Authority upon request from the judicial authority.  
12  
13  
14

### 15 6 **Predictors of Covid-19 severity**

16  
17  
18 7 Taking into consideration the morbidity and mortality predictors reported in epidemiological  
19  
20 8 studies [5,7-9], as well as comorbidity scores widely used worldwide or tuned to the Italian  
21  
22 9 population (the Charlson comorbidity index [10] and the Multisource Comorbidity Score (MCS),  
23  
24 10 developed for the general Italian population [11]), we identified 61 candidate predictors. Twenty-  
25  
26 11 seven candidate predictors were traced from inpatients diagnostic codes, five from outpatients who  
27  
28 12 were prescribed drugs, and the remaining twenty-nine from both diagnostic and therapeutic codes,  
29  
30 13 depending on the availability of specific diagnostic codes and drug therapies. Four of us (FR, DM,  
31  
32 14 MG and GM) independently attributed the ICD-9 and ATC codes to the individuals in whom one  
33  
34 15 or more of the 61 candidate predictors were detectable. Discrepancies were resolved in conference.  
35  
36 16 The list of candidate predictors, and the corresponding codes, are reported in supplementary **Table**  
37  
38 17 **S2**.  
39  
40  
41  
42  
43

### 44 18 **Score development**

45  
46 19 Since among the five participating regions, Lombardy has the largest resident population (16% of  
47  
48 20 the entire Italian population) and had been hit by the pandemic more than any other region during  
49  
50 21 the months between March and June 2020 (in that period 48% of the Covid-19 deaths registered  
51  
52 22 in Italy occurred in Lombardy), we used the data from the first epidemic wave that hit Lombardy  
53  
54 23 to develop the score.  
55  
56  
57

58 24 We included all the NHS beneficiaries who on February 21, 2020 were resident in Lombardy for  
59  
60 25 at least two years, were aged 18 to 79 years, and did not reside in a nursing home. Multivariate

1  
2  
3  
4  
5  
6  
7  
8  
9  
10  
11  
12  
13  
14  
15  
16  
17  
18  
19  
20  
21  
22  
23  
24  
25  
26  
27  
28  
29  
30  
31  
32  
33  
34  
35  
36  
37  
38  
39  
40  
41  
42  
43  
44  
45  
46  
47  
48  
49  
50  
51  
52  
53  
54  
55  
56  
57  
58  
59  
60

logistic regression was fitted for investigating the association between gender, four age classes (18-45, 46-59, 60-69 and 70-79 years) plus the above-mentioned 61 candidate predictors, and the odds of experiencing the outcome of interest, which was the composite of hospitalization in an Intensive Care Unit or death with a Covid-19 diagnosis, up to June 30, 2020. Candidate predictors entered as dichotomous variables in the model, with value 1 or 0 according to whether the specific condition was or was not recorded at least once within the 781 days prior to the baseline period, i.e., from January 1<sup>st</sup>, 2018 until February 20, 2020. The least absolute shrinkage and selection operator (LASSO) method was applied for selecting the conditions able to predict the outcome [12]. Finally, a score was assigned to each condition selected with the LASSO method by using the coefficient estimated from the model. The coefficient was converted into a score by multiplication by 10 and rounding to the nearest whole number. Scores were sequentially summed to produce a total aggregate score. The index so obtained was termed Covid-Vulnerability Score (CVS). To verify the extension of the association between the increasing value of the score and the increasing occurrence of severe/fatal forms of Covid-19, CVS categories of width 10 was plotted against the outcome incidence. The prevalence of the Lombardy cohort members according to CVS categories was also calculated. Restricted cubic spline with 3 degrees of freedom was used to represent the corresponding smoothed trends [13].

### **Score validation and performance**

To validate the model across different temporal and geographic conditions (i.e., to assess the performance of CVS for different treatment options, climatic characteristics, intensity of the epidemic spread, etc.), the score developed from the Lombardy cohort was applied to several validation sets selected by using the same inclusion/exclusion criteria of the original (Lombardy) one. One validation set consisted of the cohort of Lombardy NHS beneficiaries who were free from Covid-19 up to July 1, 2020, after which date a new observation period was started and continued until censorship at the outcome occurrence (intensive care admissions or deaths) or at

1  
2  
3 1 December 31th, 2020, whatever happened first. Other validation sets consisted of NHS  
4  
5 2 beneficiaries from each of the other regions included in the study. For these other regional cohorts,  
6  
7 3 observations started on March 1th, 2020 and were censored at the outcome occurrence or at  
8  
9 4 December 31, 2020, whatever happened first.

10  
11  
12  
13 5 The performance of CVS was assessed through discrimination and calibration. Discrimination was  
14  
15 6 evaluated by the Receiver Operating Characteristic (ROC) curves and the corresponding  
16  
17 7 underlying areas (AUCs) [14]. Calibration plots displayed observed vs. predicted outcome  
18  
19 8 probabilities. The Hosmer-Lemeshow goodness-of-fit test modified by Yu et al [15] was used for  
20  
21 9 testing the null hypothesis of agreement between observed and predicted outcome probabilities.  
22  
23

## 24 25 10 **Patient and Public involvement**

26  
27  
28 11 No patient was involved in setting the research question or the outcome measures, nor were  
29  
30 12 patients involved in developing plans for design or implementation of the study. No patients were  
31  
32 13 asked to advise on interpretation or writing up of results.  
33  
34  
35 14

## 36 37 38 15 **Results**

### 39 40 41 16 **Covid-Vulnerability Score**

42  
43  
44 17 The 31 demographic and clinical conditions that significantly contributed to CVS are reported in  
45  
46 18 **Table 1**. As expected, older age was the major contributor to the outcome of interest, but also male  
47  
48 19 gender gave a relevant contribution. Nearly 40% of NHS beneficiaries had at least one clinical  
49  
50 20 condition contributing to CVS. Diabetes (especially if under insulin therapy), psychosis, coronary  
51  
52 21 and peripheral vascular disease, gout, use of corticosteroids, human immunodeficiency virus  
53  
54 22 (HIV) infection, malignancies and anaemias were the most relevant contributors to the outcome.  
55  
56 23 However, other 19 clinical conditions (ranging across all major nosologic macrocategories)  
57  
58 24 contributed to CVS.  
59  
60

1  
2  
3 1 **Figure 1, upper box**, shows that the probability of experiencing the outcome of interest had a  
4  
5 2 clear positive trend as CVS increased, the risk being lower than 0.05% for CVS value  $\leq 29$ ,  
6  
7 3 progressing to 2% for a CVS value between 60 and 69, and reaching a much higher value (around  
8  
9 4 4%) for CVS values  $\geq 80$ . Sixty-nine percent of NHS beneficiaries had a CVS value  $\leq 29$ , almost  
10  
11 4 30% ranged from 30 and 69, and less than 1% (0.16%) exhibited a CVS value  $\geq 70$  (**Figure 1,**  
12  
13 5 **lower box**).

### 18 7 **Covid-Vulnerability Score performance**

21 8 **Figure 2, left box**, shows that the area under the ROC curve of CVS was 0.89. This area compared  
22  
23 9 favourably with the AUC of the models based on scores not specifically addressing Covid-19, the  
24  
25 10 AUC values being 0.60 for the Charlson comorbidity index and 0.77 for MCS. The 95%  
26  
27 11 confidence intervals are not indicated in the Figure because, due to the very large sample size, they  
28  
29 12 practically coincided with the AUC values. As shown in **Figure 2, right box**, the CVS AUC values  
30  
31 13 were almost superimposable between the different regions participating in the study, i.e., 0.88,  
32  
33 14 0.86, 0.86, 0.85 and 0.86 for Lombardy, Valle d'Aosta, Marche, Puglia and Sicily cohorts,  
34  
35 15 respectively.

40 16 **Figure 3** shows that there was a good agreement between the observed and the predicted outcome  
41  
42 17 probabilities, with the calibration intercept close to the ideal value of 0 and the recalibration slope  
43  
44 18 close to the ideal value of 1 (0.93). The null hypothesis of agreement between observed and  
45  
46 19 predicted frequencies could not be rejected according to the modified Hosmer-Lemeshow test.

## 50 20 **Discussion**

53 21 Our study shows that a score based on demographic and clinical information derived from  
54  
55 22 healthcare utilization data currently used throughout Italy for the management of NHS is able to  
56  
57 23 stratify NHS beneficiaries aged 18 to 79 years for their risk to develop severe/fatal clinical  
58  
59 24 manifestations of Covid-19. The score (developed in a very large number of individuals from

1  
2  
3 1 several Italian regions) exhibited a significantly better discriminating power than the Charlson  
4  
5 2 comorbidity index, i.e. the most worldwide used comorbidity score [10] which has been recently  
6  
7 3 validated also for predicting mortality in Covid-19 patients hospitalised for pneumonia [16]. It also  
8  
9 4 outperformed a comorbidity score validated by our group for the general Italian population and  
10  
11 5 also found to be better than the Charlson comorbidity index. This allows to conclude that the score  
12  
13 6 we developed (termed Covid-Vulnerability Score or CVS) can reliably identify people in whom  
14  
15 7 age, gender and a variety of comorbidities interact to make them more at risk for the clinically  
16  
17 8 severe and fatal manifestations of SARS-CoV-2 infection. This makes CVS a potentially useful  
18  
19 9 tool for establishing priority in the future vaccination programs for the general Italian population  
20  
21 10 up to 79 years of age which has so far been based in a descending fashion on age alone as well as  
22  
23 11 on individually listed conditions or diseases that have shown a greater prevalence of severe or  
24  
25 12 lethal Covid-19 in clinical studies. CVS may also find a useful future application to the  
26  
27 13 determination of priority access to the third dose of vaccine, or to the delivery of future treatment  
28  
29 14 options, such as new antiviral agents and monoclonal antibodies, if their cost will be too high to  
30  
31 15 allow an extended use.  
32  
33  
34  
35  
36  
37

38 16 Our study identified several prognostic factors that, in addition to age and gender, predict the  
39  
40 17 severity of Covid-19 and are included among the medical illnesses and dispensed drugs retrievable  
41  
42 18 in the healthcare utilization database. Consistently with a recent meta-analysis [4], diabetes  
43  
44 19 (mainly when under insulin therapy), cardiovascular disease (mainly coronary and peripheral  
45  
46 20 vascular disease), hypertension, malignancies, chronic respiratory and kidney diseases, dementia  
47  
48 21 and obesity were all associated with the Covid-19 outcome. People with HIV [17], and those who  
49  
50 22 had a recent history of severe clinical manifestations of an infectious disease, including  
51  
52 23 tuberculosis [18], also showed a significant association with the severity of Covid-19.  
53  
54 24 Additionally, and according to other studies, we found that diseases of the neurological system  
55  
56 25 (e.g., epilepsy, recurrent seizures [19] and Parkinson disease and parkinsonism [20]), of the  
57  
58  
59  
60



1  
2  
3  
4  
5  
6  
7  
8  
9  
10  
11  
12  
13  
14  
15  
16  
17  
18  
19  
20  
21  
22  
23  
24  
25  
26  
27  
28  
29  
30  
31  
32  
33  
34  
35  
36  
37  
38  
39  
40  
41  
42  
43  
44  
45  
46  
47  
48  
49  
50  
51  
52  
53  
54  
55  
56  
57  
58  
59  
60

1 gastrointestinal tract (e.g., liver cirrhosis and other liver chronic diseases [21]), of metabolism  
2 (e.g., gout [22]), of the skin (e.g. psoriasis [23]), and of the blood and blood-forming organs (e.g.  
3 coagulation defects [24] and anaemias [25]) contributed to the Covid-19 related clinical frailty.

4 We also confirmed the involvement in a greater risk of severe or lethal forms of Covid-19 of  
5 mental disorders, such as psychosis and depression [26] as well as of recent dispensations of drugs  
6 with immunosuppressive properties (e.g., corticosteroids [27]) agents against chronic pain (e.g.,  
7 narcotic analgesics [28]), or with an anticoagulant [29] action. This confirms the now established  
8 notion that alterations of the structure and function of virtually all organs and systems of the body  
9 may adversely affect resistance to the Covid-19 disease. It should be emphasized that the  
10 association between the severity of Covid-19 and the dispensed drugs we found in our study is not  
11 in contrast with the use of some of these drugs for the treatment of Covid-19, because in our  
12 analysis previous drug therapies were searched for to track background comorbidities and not to  
13 investigate their possible direct effect on the disease. In this context, it is likely that use of  
14 corticosteroids and other immunosuppressive agents reflected the existence of autoimmune  
15 diseases, while use of anticoagulants reflected the existence of atrial fibrillation, thromboembolic  
16 states or other cardiovascular disorders, which have been shown to reduce patients' defence against  
17 the virus [30].

18 Our study has implications for several aspects of the public health policy against Covid-19, the  
19 most important of which is the priority criteria to adopt for the third dose of vaccine to be delivered  
20 to the Italian population by the Italian Ministry of Health. As done in the first vaccination  
21 campaign, the plan is to offers an early cost-free priority third dose to people resident in a nursing  
22 home and aged 80 years or older. This has a strong rationale because of the 24,575 severe/fatal  
23 cases of Covid-19 registered in Lombardy during 2020, 12,593 (51%) occurred in people aged 80  
24 years and older. Furthermore, in Italy the average age of Covid-19 fatalities during the entire  
25 pandemic period have been reported to be 82 years, which means that in octogenarians and



1 nonagenarians search for and use of a risk score more complex than age alone may carry a limited  
2 practical advantage. However, this is not the case for the vaccination program to be implemented  
3 in people aged 79 years or less, in which administration of the third dose vaccine is planned after  
4 completion of the third dose vaccination in older individuals. In these people, use of CVS may  
5 offer the possibility of identifying more accurately those at a high risk of development of a severe  
6 or lethal form of Covid-19 and thus to predispose their vaccination reinforcement at an earlier  
7 time. The same advantage can be foreseen for the criteria to adopt for the delivery of future  
8 treatment strategies such as new antiviral drugs or monoclonal antibodies, if current research will  
9 prove their life-saving role. In this case the high cost of these treatments will make priority criteria  
10 for their use absolutely necessary.

11 The present study has several strengths and some limitations. An important strength is that our  
12 sample of NHS beneficiaries was not only extremely large but it also reflected an unselected  
13 population. Another strength is that the Italian healthcare utilization database allows to track  
14 services provided by the NHS with considerable accuracy because providers must document  
15 services to claim reimbursement, and incorrect reports carry legal consequences. Finally, a  
16 remarkable finding of our study is that, although built from the Lombardy data collected during  
17 the first epidemic wave (i.e. before the summer 2020), CVS performed similarly well during the  
18 second epidemic wave (i.e. after the summer 2020), despite differences in treatment options for in  
19 and outpatients as well as hospitalization criteria compared to the first epidemic wave. It is also  
20 remarkable that the CVS performance was virtually superimposable in all regions of Italy, despite  
21 their different social features, climatic characteristics, and intensity of the epidemic spread. This  
22 suggests that the advantages of the CVS score for stratification of the risk Covid-19 complications  
23 extends across different temporal and geographic conditions.

24 The limitations are that the predictors of Covid-19 complications we searched for are restricted to  
25 those routinely collected and available in the administrative databases (the same for all regions of

1  
2  
3  
4  
5  
6  
7  
8  
9  
10  
11  
12  
13  
14  
15  
16  
17  
18  
19  
20  
21  
22  
23  
24  
25  
26  
27  
28  
29  
30  
31  
32  
33  
34  
35  
36  
37  
38  
39  
40  
41  
42  
43  
44  
45  
46  
47  
48  
49  
50  
51  
52  
53  
54  
55  
56  
57  
58  
59  
60

Italy), i.e., hospital admissions and drug dispensed. Thus, educational factors, functional status, socioeconomic characteristics, and other extra-clinical variables that can affect the prognosis of Covid-19 patients were not included. Our scoring system also did not capture the severity of associated comorbidities, health services and treatments supplied by private providers, and misdiagnosis (due to poor accuracy in reporting diagnoses and comorbidities) and up-coding of hospital records.

Finally, our approach may have failed to identify comorbidities that, albeit increasing the risk of severe/fatal clinical manifestations of Covid-19, limited social contacts, thereby favouring an escape from the SARS-CoV-2 virus infection of the individuals affected. However, because the purpose of our study was to identify individuals to which offer earlier protection, patients with a disease that makes them unexposed to the infection should receive later preventive interventions (i.e., treatments or vaccination). Of course, exclusion from the scoring system of diseases so debilitating or incapacitating to limit social contacts but requiring a caregiver is a major limitation of our study.

## Conclusion

In summary, we developed and validated a score derived from data used for public health management, which predicts severe/fatal outcomes of Covid-19 in a large number of beneficiaries of the Italian NHS more accurately than other available scores. Our findings show that this can be achieved by combined use of demographic (age and gender) and clinical (29 conditions/diseases) predictors of the Covid-19 outcome. Because of its performance, use of this score may help health decision makers to achieve a more accurate identification of high-risk citizens who need early preventive interventions.

## 1 **Funding**

2 This study was funded by a research grant from the Italian Health Ministry: “Modelli per il  
3 monitoraggio e la valutazione delle cure integrate (CI) nell’ambito del Nuovo Sistema di Garanzia  
4 dell’assistenza sanitaria“ project (grant number J59H06000160001). The funding source had no  
5 role in the design and conduct of the study; collection, management, analysis, and interpretation  
6 of the data; preparation, review, or approval of the manuscript; and decision to submit the  
7 manuscript for publication.

## 8 **Conflicts of Interest**

9 Giovanni Corrao received research support from the European Community (EC), the Italian  
10 Agency of Drug (AIFA), the Italian Ministry of Education, University and Research (MIUR), and  
11 the Italian Health Ministry. He took part to a variety of projects that were funded by pharmaceutical  
12 companies (i.e., Novartis, GSK, Roche, AMGEN and BMS). He also received honoraria as  
13 member of Advisory Board from Roche.

14 Giuseppe Mancía received honoraria for participation as speaker/chairman in  
15 national/international meetings from Boehringer Ingelheim, Ferrer, Medtronic, Menarini Int,  
16 Merck Serono, Recordati, and Servier.

17 For the remaining authors, nothing was declared.

## 18 **Contributors**

19 GC conceived the idea for this manuscript. GC, FR and FC designed the study. GC and GM drafted  
20 the manuscript. FR, AA, ADE, SA, MI and ME performed the data analysis. SS, VL, CT, PV, LS,

1  
2  
3  
4  
5  
6  
7  
8  
9  
10  
11  
12  
13  
14  
15  
16  
17  
18  
19  
20  
21  
22  
23  
24  
25  
26  
27  
28  
29  
30  
31  
32  
33  
34  
35  
36  
37  
38  
39  
40  
41  
42  
43  
44  
45  
46  
47  
48  
49  
50  
51  
52  
53  
54  
55  
56  
57  
58  
59  
60

1 and RB extracted the data and authorised their utilisation. - GC, FC, SC, CG, DM, MG, and GM  
2 supervised the project. All authors assisted the results interpretation and manuscript revision. All  
3 authors read and approved the final manuscript.

#### 5 **Ethical approval**

6 Under the rules of the Italian Drugs Agency (available at:  
7 [http://www.agenziafarmaco.gov.it/sites/default/files/det\\_20marzo2008.pdf](http://www.agenziafarmaco.gov.it/sites/default/files/det_20marzo2008.pdf)), retrospective studies  
8 using administrative databases do not require Ethics Committee protocol approval.

#### 10 **Data sharing**

11 The data that support the findings of this study are available from the Italian regions, but  
12 restrictions apply to the availability of these data, which were used under license for the current  
13 study, and so are not publicly available. Data are however available from the Italian regions upon  
14 reasonable request.

#### 16 **Dissemination to participants and related patient and public communities**

17 There are no plans to disseminate the results of the research to study participants or the relevant  
18 patient community.

19  
20 The lead author (the manuscript's guarantor) affirms that the manuscript is an honest, accurate,  
21 and transparent account of the study being reported; that no important aspects of the study have

- 1
- 2
- 3 1 been omitted; and that any discrepancies from the study as planned (and, if relevant, registered)
- 4
- 5 2 have been explained.
- 6
- 7
- 8
- 9
- 10
- 11
- 12
- 13
- 14
- 15
- 16
- 17
- 18
- 19
- 20
- 21
- 22
- 23
- 24
- 25
- 26
- 27
- 28
- 29
- 30
- 31
- 32
- 33
- 34
- 35
- 36
- 37
- 38
- 39
- 40
- 41
- 42
- 43
- 44
- 45
- 46
- 47
- 48
- 49
- 50
- 51
- 52
- 53
- 54
- 55
- 56
- 57
- 58
- 59
- 60

For peer review only

## References

- 1 [1] Lloyd EC, Gandhi TN, Petty LA. Monoclonal Antibodies for COVID-19. JAMA. 2021 Feb 5.  
2 doi: 10.1001/jama.2021.1225. Epub ahead of print. PMID: 33544136
- 3 [2] Földi M, Farkas N, Kiss S, et al. Obesity is a risk factor for developing critical condition in  
4 COVID-19 patients: A systematic review and meta-analysis. *Obes Rev*. 2020 Oct;21(10):e13095
- 5 [3] Mantovani A, Byrne CD, Zheng MH, Targher G. Diabetes as a risk factor for greater COVID-  
6 19 severity and in-hospital death: A meta-analysis of observational studies. *Nutr Metab Cardiovasc*  
7 *Dis* 2020;30:1236-48
- 8 [4] Lippi G., Wong J., Henry B. M. Hypertension and its severity or mortality in Coronavirus  
9 Disease 2019 (COVID-19): a pooled analysis. *Polish Archives of Internal Medicine* 2020 doi:  
10 10.20452/pamw.15272
- 11 [5] Izcovich A, Ragusa MA, Tortosa F, et al. Prognostic factors for severity and mortality in  
12 patients infected with COVID-19: A systematic review. *PLoS One* 2020;15:e0241955
- 13 [6] Liang W, Liang H, Ou L, Chen B, Chen A, Li C, et al. Development and Validation of a  
14 Clinical Risk Score to Predict the Occurrence of Critical Illness in Hospitalized Patients with  
15 COVID-19. *JAMA Intern Med*. 2020; 10.1001/jamainternmed.2020.2033
- 16 [7] Wynants L, Van Calster B, Collins GS, et al. Prediction models for diagnosis and prognosis of  
17 covid-19 infection: systematic review and critical appraisal. *BMJ* 2020;369:m1328
- 18 [8] Gupta RK, Marks M, Samuels THA, et al; UCLH COVID-19 Reporting Group. Systematic  
19 evaluation and external validation of 22 prognostic models among hospitalised adults with  
20 COVID-19: an observational cohort study. *Eur Respir J* 2020;56:2003498
- 21 [9] Ebrahimi M, Malehi AS, Rahim F. COVID-19 Patients: A Systematic Review and Meta-  
22 Analysis of Laboratory Findings, Comorbidities, and Clinical Outcomes Comparing Medical Staff  
23 versus the General Population. *Osong Public Health Res Perspect* 2020;11:269-79

- 1  
2  
3 1 [10] Charlson ME, Pompei P, Ales KL, MacKenzie CR. A new method of classifying prognostic  
4  
5 2 comorbidity in longitudinal studies: development and validation. *J Chronic Dis* 1987;40:373-83  
6  
7  
8 3 [11] Corrao G, Rea F, Di Martino M, et al. Developing and validating a novel multisource  
9  
10 4 comorbidity score from administrative data: a large population-based cohort study from Italy. *BMJ*  
11  
12 5 *Open* 2017;7:e019503  
13  
14  
15 6 [12] Tibshirani R. The LASSO method for variable selection in the Cox model. *Stat Med*  
16  
17 7 1997;16:385-95  
18  
19 8 [13] Gauthier J, Wu QV, Gooley TA. Cubic splines to model relationships between continuous  
20  
21 9 variables and outcomes: a guide for clinicians. *Bone Marrow Transplantation* 2020;55:675-80  
22  
23  
24 10 [14] Pencina MJ, D'Agostino RB Sr, D'Agostino RB Jr. Evaluating the added predictive ability of  
25  
26 11 a new marker: From area under the ROC curve to reclassification and beyond. *Stat Med*  
27  
28 12 2008;27:157-72  
29  
30  
31 13 [15] Yu W, Xu W, Zhu L. A modified Hosmer–Lemeshow test for large data sets. *Communications*  
32  
33 14 *in Statistics - Theory and Methods* 2017;46:11813-25  
34  
35 15 [16] Christensen DM, Strange JE, Gislason G, et al. Charlson Comorbidity Index Score and Risk  
36  
37 16 of Severe Outcome and Death in Danish COVID-19 Patients. *J Gen Intern Med* 2020;35:2801-3  
38  
39  
40 17 [17] Shareef MA, Bashaiwth HM, AlAkbari AO, et al. A systematic review of contemporary  
41  
42 18 evidence on SARS-CoV-2 and HIV coinfection: What does it look like up to date? *Avicenna J*  
43  
44 19 *Med* 2020;10:189-97  
45  
46  
47 20 [18] Liu Y., Bi L., Chen Y. Active or latent tuberculosis increases susceptibility to COVID-19 and  
48  
49 21 disease severity. *medRxiv*. March 2020 doi: 10.1101/2020.03.10.20033795. 2020.03.10.20033795  
50  
51 22 [19] Cabezudo-Garcia P, Ciano-Petersen NL, Mena-Vazquez N, et al. Incidence and case fatality  
52  
53 23 rate of COVID-19 in patients with active epilepsy. *Neurology* 2020;95:e1417-e1425  
54  
55  
56 24 [20] Vignatelli L, Zenesini C, Belotti LMB, et al. Risk of hospitalization and death for COVID-19  
57  
58 25 in people with Parkinson's disease or parkinsonism. *Mov Disord*. 2020 Nov  
59  
60 26 16:10.1002/mds.28408

- 1  
2  
3 1 [21] Bajaj JS, Garcia-Tsao G, Wong F, et al. Cirrhosis is associated with high mortality and  
4 readmissions over 90 days regardless of COVID-19: A multi-center cohort. *Liver Transpl* 2021  
5 Jan 11. doi: 10.1002/lt.25981  
6  
7  
8 2 [22] Safdarian AR, Momenzadeh K, Kahe F, Farhangnia P, Rezaei N. Death due to COVID-19 in  
9 a patient with diabetes, epilepsy, and gout comorbidities. *Clin Case Rep* 2020 Nov  
10 25:10.1002/ccr3.3557  
11  
12  
13 3 [23] Mahil SK, Dand N, Mason KJ, et al. Factors associated with adverse COVID-19 outcomes in  
14 patients with psoriasis-insights from a global registry-based study. *J Allergy Clin Immunol*  
15 2021;147:60-71  
16  
17  
18 4 [24] Tang N, Li D, Wang X, Sun Z. Abnormal coagulation parameters are associated with poor  
19 prognosis in patients with novel coronavirus pneumonia. *J Thromb Haemost* 2020;18:844-7  
20  
21  
22 5 [25] Roy NBA, Telfer P, Eleftheriou P, et al. Protecting vulnerable patients with inherited  
23 anaemias from unnecessary death during the COVID-19 pandemic. *Br J Haematol* 2020;189:635-9  
24  
25  
26 6 [26] Druss BG. Addressing the COVID-19 pandemic in populations with serious mental illness.  
27 *JAMA Psychiatry* 2020;77:891-2  
28  
29  
30 7 [27] Suissa S, Patenaude V, Lapi F, Erns P. Inhaled corticosteroids in COPD and the risk of serious  
31 pneumonia. *Thorax* 2013;68:1029-36  
32  
33  
34 8 [28] Wiese AD, Griffin MR, Schaffner W, et al. Long-acting Opioid Use and the Risk of Serious  
35 Infections: A Retrospective Cohort Study. *Clin Infect Dis* 2019;68:1862-9  
36  
37  
38 9 [29] Kollias A, Kyriakoulis KG, Dimakakos E, et al. Thromboembolic risk and anticoagulant therapy  
39 in COVID-19 patients: emerging evidence and call for action. *Br J Haematol* 2020;189:846-7  
40  
41  
42 10 [30] Rentsch CT, Beckman JA, Tomlinson L, et al. Early initiation of prophylactic anticoagulation  
43 for prevention of COVID-19 mortality: a nationwide cohort study of hospitalized patients in the  
44 United States. *medRxiv*. 2020 Dec 11:2020.12.09.20246579  
45  
46  
47  
48  
49  
50  
51  
52  
53  
54  
55  
56  
57  
58  
59  
60



**Table 1.** Prevalence of male gender, age categories and 29 conditions/diseases contributing to the Covid-Vulnerability Score (CVS). For each listed contributor, the outcome incidence among the exposed people, the odds ratio (and 90% confidence interval), and the corresponding weight of the contribution to CVS, are reported

|                                                        | No. (%)           | No. outcome events | Incidence every 10,000 | Odds ratio† | (90% confidence interval†) | Weight‡ |
|--------------------------------------------------------|-------------------|--------------------|------------------------|-------------|----------------------------|---------|
| Male gender                                            | 3,797,636 (49.6%) | 6,849              | 18.0                   | 3.07        | 2.95 to 3.19               | 11      |
| Age ≤ 45                                               | 3,111,426 (40.6%) | 271                | 0.9                    | 1.00        | (reference)                | 0       |
| Age 46-59                                              | 2,305,062 (30.1%) | 1,435              | 6.2                    | 5.95        | (5.36 to 6.62)             | 18      |
| Age 60-69                                              | 1,222,310 (16.0%) | 2,506              | 20.5                   | 15.62       | (14.09 to 17.32)           | 27      |
| Age 70-79                                              | 1,016,704 (13.3%) | 4,948              | 48.7                   | 27.64       | (24.96 to 30.61)           | 33      |
| HIV infection                                          | 31,300 (0.4%)     | 154                | 49.2                   | 1.52        | (1.33 to 1.74)             | 4       |
| Other infectious and parasitic diseases                | 42,422 (0.6%)     | 443                | 104.4                  | 1.37        | (1.26 to 1.49)             | 3       |
| Malignancies                                           | 177,024 (2.3%)    | 1,073              | 60.6                   | 1.42        | (1.35 to 1.50)             | 4       |
| Diabetes without insulin therapy                       | 278,785 (3.6%)    | 1,419              | 50.9                   | 1.60        | (1.53 to 1.68)             | 5       |
| Insulin therapy                                        | 101,996 (1.3%)    | 973                | 95.4                   | 2.35        | (2.21 to 2.49)             | 9       |
| Obesity                                                | 16,571 (0.2%)     | 103                | 62.2                   | 1.34        | (1.13 to 1.58)             | 3       |
| Disorders of fluid, electrolyte, and acid-base balance | 8,576 (0.1%)      | 135                | 157.4                  | 1.29        | (1.11 to 1.49)             | 3       |
| Gout                                                   | 164,428 (2.2%)    | 1,518              | 92.3                   | 1.57        | (1.50 to 1.66)             | 5       |
| Coagulation defects                                    | 3,603 (0.1%)      | 36                 | 99.9                   | 1.41        | (1.07 to 1.85)             | 3       |
| Anaemias                                               | 613,430 (8.0%)    | 2,228              | 36.3                   | 1.51        | (1.45 to 1.58)             | 4       |
| Dementia / Alzheimer                                   | 12,671 (0.2%)     | 145                | 114.4                  | 1.26        | (1.09 to 1.46)             | 2       |
| Psychosis                                              | 138,034 (1.8%)    | 684                | 49.6                   | 1.94        | (1.80 to 2.08)             | 7       |
| Depression                                             | 588,688 (7.7%)    | 1,729              | 29.4                   | 1.35        | (1.29 to 1.42)             | 3       |
| Parkinson's disease and parkinsonism                   | 40,885 (0.5%)     | 274                | 67.0                   | 1.21        | (1.09 to 1.34)             | 2       |
| Epilepsy and recurrent seizures                        | 122,171 (1.6%)    | 510                | 41.7                   | 1.37        | (1.26 to 1.48)             | 3       |
| Other diseases of the nervous system and sense organs  | 35,495 (0.5%)     | 253                | 71.3                   | 1.26        | (1.13 to 1.40)             | 2       |
| Ischaemic Heart Disease/Angina                         | 91,539 (1.2%)     | 845                | 92.3                   | 1.18        | (1.11 to 1.26)             | 2       |
| Heart failure                                          | 21,840 (0.3%)     | 428                | 196.0                  | 1.30        | (1.18 to 1.43)             | 3       |
| Vascular diseases                                      | 14,936 (0.2%)     | 217                | 145.3                  | 1.17        | (1.04 to 1.32)             | 2       |
| Cerebrovascular diseases                               | 35,205 (0.5%)     | 333                | 94.6                   | 1.12        | (1.02 to 1.23)             | 1       |
| Hypertension                                           | 796,044 (10.4%)   | 3,136              | 39.4                   | 1.20        | (1.15 to 1.25)             | 2       |

|                                                           |                   |       |       |      |                |   |
|-----------------------------------------------------------|-------------------|-------|-------|------|----------------|---|
| Coronary and peripheral vascular disease                  | 658,737 (8.6%)    | 2,668 | 40.5  | 1.75 | (1.68 to 1.82) | 6 |
| Oral anticoagulant agents                                 | 144,713 (1.9%)    | 1,221 | 84.4  | 1.39 | (1.32 to 1.47) | 3 |
| COPD/Asthma                                               | 20,034 (0.3%)     | 268   | 133.8 | 1.15 | (1.03 to 1.28) | 1 |
| Liver cirrhosis and other liver chronic diseases          | 29,484 (0.4%)     | 177   | 60.0  | 1.31 | (1.16 to 1.49) | 3 |
| Chronic kidney disease                                    | 17,109 (0.2%)     | 371   | 216.8 | 1.32 | (1.20 to 1.46) | 3 |
| Diseases of the skin and subcutaneous tissues             | 106,747 (1.4%)    | 353   | 33.1  | 1.10 | (1.00 to 1.20) | 1 |
| Chronic pain                                              | 191,442 (2.5%)    | 1,007 | 52.6  | 1.28 | (1.21 to 1.36) | 2 |
| Corticosteroids                                           | 935,246 (12.2%)   | 2,588 | 27.7  | 1.62 | (1.55 to 1.68) | 5 |
| Individuals without any of the 29 conditions above listed | 4,600,012 (60.1%) | 1,350 | 2.9   | -    | -              | - |

HIV, Human immunodeficiency virus; COPD, Chronic obstructive pulmonary disease

The analysis was based on the cohort of 7,655,502 beneficiaries of the Lombardy Region Health Service for at least two years, who on February 21, 2020 were alive, aged between 18 and 79 years and did not reside in a nursing home. During the first epidemic wave (until June 2020), this cohort experienced 9,160 severe (intensive care unit admitted and mechanically ventilated via intubation) and / or fatal outcomes. The average incidence rate during the first wave was therefore 12.0 cases per 10,000 people at risk

† Odds ratio, and 90% confidence interval, estimated by multivariable logistic regression. Odds ratios measured the strength of the association between the presence/absence of each of the listed contributors and the outcome odds

‡ Weights were obtained from the coefficients of the logistic model; the latter were converted into scores by multiplying them by 10 and rounding them to the nearest whole number

## Legend of Figures

**Figure 1.** Relationship between categories of Covid-Vulnerability Score and (i) the risk of occurrence of severe/fatal forms of Covid-19 (upper box), (ii) its distribution among NHS beneficiaries (bottom box). Columns indicate the observed values (of risk and prevalence respectively). Solid and dashed lines respectively represent the fitted cubic spline with the corresponding 5<sup>th</sup> and 95<sup>th</sup> percentiles

**Footnote.** The analysis was based on the cohort of 7,655,502 beneficiaries of the Lombardy Region Health Service for at least two years, who on February 21, 2020 were alive, aged between 18 and 79 years and did not reside in a nursing home. During the first epidemic wave (until June 2020), this cohort experienced 9,160 severe (intensive care unit admitted and mechanically ventilated via intubation) and / or fatal outcomes. The average incidence rate during the first wave was therefore 12.0 cases per 10,000 people at risk.

**Figure 2.** Receiver Operating Characteristics (ROC) curves comparing discriminant power (i) of Covid-Vulnerability Score (CVS), Charlson Comorbidity Index (CCI) and Multisource Comorbidity Score (MCS) from the derivation set (left box); (ii) of Covid-Vulnerability Score (CVS) from several validation sets (right box)

**Footnote.** Derivation set (left box) was based on the cohort of 7,655,502 beneficiaries of the Lombardy Region Health Service for at least two years, who on February 21, 2020 were alive, aged between 18 and 79 years and did not reside in a nursing home. During the first epidemic wave (until June 2020), this cohort experienced 9,160 severe (intensive care unit admitted and mechanically ventilated via intubation) and / or fatal outcomes. Validation sets (right box) were based on: (i) 7,575,924 resident in Lombardy whom observation started on July 1, 2020 and who experienced 2,822 severe/fatal outcomes within December 31, 2020; (ii) 92,267, 1,110,570, 3,012,754 and 3,649,518 beneficiaries of Valle d'Aosta, Marche, Puglia and Sicily regional health services, whom observation started on March 1, 2020 and who respectively experienced 173, 542, 1,953 and 1,541 severe/fatal outcomes within December 31, 2020

**Figure 3.** Calibration plot of observed (X-axis) vs predicted (Y-axis) risk of severe/fatal outcomes

**Footnote.** The analysis was based on the pooled validation sets of 15,441,033 from Lombardy, Valle d'Aosta, Marche, Puglia and Sicily who experienced 7,031 severe/fatal outcomes from starting (July 1, 2020 in Lombardy, or March 1, 2020 in the other regions) until December 31, 2020

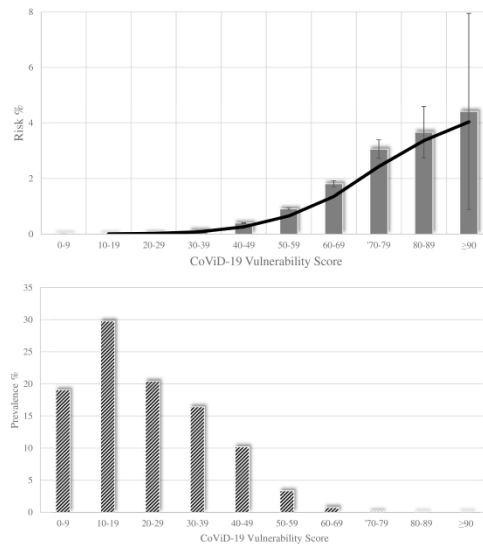

Relationship between categories of CoVID-19 Vulnerability Score and (i) the risk of occurrence of severe/fatal forms of Covid-19 (upper box), (ii) its distribution among NHS beneficiaries (bottom box). Columns indicate the observed values (of risk and prevalence respectively). Solid and dashed lines respectively represent the fitted cubic spline with the corresponding 5th and 95th percentiles



Receiver Operating Characteristics (ROC) curves comparing discriminant power (i) of CoViD-19 Vulnerability Score (CVS), Charlson Comorbidity Index (CCI) and Multisource Comorbidity Score (MCS) from the derivation set (left box); (ii) of CoViD-19 Vulnerability Score (CVS) from several validation sets (right box)

1  
2  
3  
4  
5  
6  
7  
8  
9  
10  
11  
12  
13  
14  
15  
16  
17  
18  
19  
20  
21  
22  
23  
24  
25  
26  
27  
28  
29  
30  
31  
32  
33  
34  
35  
36  
37  
38  
39  
40  
41  
42  
43  
44  
45  
46  
47  
48  
49  
50  
51  
52  
53  
54  
55  
56  
57  
58  
59  
60



Calibration plot of observed (X-axis) vs predicted (Y-axis) risk of severe/fatal outcomes

1  
2  
3  
4 **Addressing vaccination priority by stratifying general population according**  
5  
6  
7 **with frailty: a large population-based cohort study**  
8  
9

10  
11 Giovanni Corrao, PhD<sup>1,2</sup>, Federico Rea, PhD<sup>1,2</sup>, Flavia Carle, PhD<sup>1,3</sup>, Salvatore Scondotto, PhD<sup>1,4</sup>,  
12  
13 Alessandra Allotta, MSc<sup>4</sup>, Vito Lepore, MD<sup>5</sup>, Antonio D’Ettorre, MSc<sup>5</sup>, Cinzia Tanzarella, MSc<sup>5</sup>,  
14  
15 Patrizia Vittori, MSc<sup>6</sup>, Sabrina Abena, MSc<sup>6</sup>, Marica Iommi, PhD<sup>3</sup>, Liana Spazzafumo, MSc<sup>1,7</sup>,  
16  
17 Michele Ercolanoni, MSc<sup>8,9</sup>, Roberto Blaco, MSc<sup>9</sup>, Simona Carbone, MSc<sup>10</sup>, Cristina Giordani,  
18  
19 MSc<sup>10</sup>, Dario Manfellotto, MD<sup>11</sup>, Massimo Galli, MD<sup>12,13</sup>, Giuseppe Mancina, MD<sup>14,15</sup> on behalf of  
20  
21 the “Monitoring and Assessing care Pathways (MAP)” working group of the Italian Ministry of  
22  
23 Health  
24  
25  
26  
27  
28  
29

30 <sup>1</sup> National Centre for Healthcare Research and Pharmacoepidemiology, University of Milano-  
31 Bicocca, Milan, Italy

32 <sup>2</sup> Unit of Biostatistics, Epidemiology and Public Health, Department of Statistics and Quantitative  
33 Methods, University of Milano-Bicocca, Milan, Italy

34 <sup>3</sup> Center of Epidemiology and Biostatistics, Polytechnic University of Marche, Ancona, Italy

35 <sup>4</sup> Department of Health Services and Epidemiological Observatory, Regional Health Authority,  
36 Sicily Region, Palermo, Italy

37 <sup>5</sup> Regional Health Agency of Puglia (Agenzia regionale socio-sanitaria), Bari, Italy

38 <sup>6</sup> Regional Unit of Epidemiology and Social Policies, Regional Health Authority, Valle D’Aosta  
39 Region, Aosta, Italy

40 <sup>7</sup> Regional Health Agency of Marche, Ancona, Italy

41 <sup>8</sup> ARIA S.p.a., Milan, Italy

42 <sup>9</sup> Epidemiologic Observatory, Regional Welfare Service, Lombardy Region, Milan, Italy

43 <sup>10</sup> Department of Health Planning, Italian Health Ministry, Rome, Italy

44 <sup>11</sup> Department of Internal Medicine, Hospital Fatebenefratelli - AFaR, Isola Tiberina, Rome, Italy

45 <sup>12</sup> Infectious Diseases Unit, Luigi Sacco Hospital, Milan, Italy

46 <sup>13</sup> Department of Biomedical and Clinical Sciences, University of Milan, Milan, Italy

47 <sup>14</sup> Emeritus Professor, University of Milano-Bicocca, Milan, Italy

48 <sup>15</sup> Policlinico di Monza, Monza, Italy  
49  
50  
51  
52  
53

54 **SUPPLEMENTARY MATERIAL**  
55  
56  
57  
58  
59  
60

**Supplementary Table S1.** Selected features of regional populations included into the validation study in comparison with entire Italian population

| Region        | Location       | Indicators of Covid-19 Epidemic Spread<br>(March-December 2020)‡ |                                  |                   |        |
|---------------|----------------|------------------------------------------------------------------|----------------------------------|-------------------|--------|
|               |                | Italian 2020 population census†                                  |                                  | Ascertained cases | Deaths |
|               |                | Whole population                                                 | Population aged<br>18 – 79 years |                   |        |
| Lombardy      | Norther Italy  | 10,027,602                                                       | 7,663,864                        | 478,903           | 25,123 |
| Valle d'Aoste | North Italy    | 125,034                                                          | 95,914                           | 7,273             | 379    |
| Marche        | Central Italy  | 1,512,672                                                        | 1,150,809                        | 41,624            | 1,571  |
| Puglia        | Southern Italy | 3,953,305                                                        | 3,055,720                        | 90,964            | 2,472  |
| Sicily        | Island         | 4,875,290                                                        | 3,744,848                        | 93,644            | 2,412  |
|               | Total          | 20,493,903                                                       | 15,711,155                       | 712,408           | 31,957 |
|               | Italy          | 59,641,488                                                       | 45,788,626                       | 2,107,166         | 74,159 |

† source: <http://demo.istat.it/popres/index.php?anno=2020&lingua=ita>

‡ source: Protezione Civile. Dati COVID-19 Italia (available at <https://github.com/pcm-dpc/COVID-19>)



**Supplementary Table S2.** List of candidate conditions for predicting the risk of experiencing severe fatal forms of COVID-19 infection

| Diagnostic categories                                                 | #                                              | Disease / condition                                                    | ICD-9 CM                                                                                                                                                                         | ATC                                                                                                                    |                            |
|-----------------------------------------------------------------------|------------------------------------------------|------------------------------------------------------------------------|----------------------------------------------------------------------------------------------------------------------------------------------------------------------------------|------------------------------------------------------------------------------------------------------------------------|----------------------------|
| Infectious and parasitic diseases                                     | 1                                              | HIV infection                                                          | 042.x, V08                                                                                                                                                                       | J05AB14, J05AE, J05AF01, J05AF02, J05AF04, J05AF05, J05AF06, J05AF09, J05AG, J05AR, J05AX07, J05AX08, J05AX09, J05AX12 |                            |
|                                                                       | 2                                              | Tuberculosis and Other infectious and parasitic diseases               | 010.x - 018.x, 001.x-009.x, 020.x-027.x, 030.x-041.x, 045.x-057.x, 060.x-066.x, 070.x-088.x, 090.x-104.x, 110.x-118.x, 120.x-139.x                                               | J04AB                                                                                                                  |                            |
| Neoplasms                                                             | 3                                              | Solid malignancies and Neoplasm of lymphatic and haematopoietic tissue | 140.x-165.x, 170.x-176.x, 179.x-199.x, V58.0, 92.2, 200.x-208.x                                                                                                                  | L01, L03AC, L02BA01, L02BA02, L02BG02, L02BG03, L02BG04, L02BG06, L02BB01, L02BB03, L02AE02, L02AE04, L02AB01          |                            |
|                                                                       | 4                                              | Benign neoplasm and carcinoma in situ                                  | 210.x-234.x                                                                                                                                                                      |                                                                                                                        |                            |
| Endocrine, nutritional and metabolic diseases, and immunity disorders | 5                                              | Hypothyroidism                                                         | 243, 244.x                                                                                                                                                                       | H03A, H03B                                                                                                             |                            |
|                                                                       | 6                                              | Hyper e hypoparathyroidism                                             | 252.0, 252.1                                                                                                                                                                     |                                                                                                                        |                            |
|                                                                       | 7                                              | Diabetes without insulin therapy                                       | 250.x, 348.0x, 357.2, 362.0, 366.41                                                                                                                                              | A10B                                                                                                                   |                            |
|                                                                       | 8                                              | Insulin therapy                                                        |                                                                                                                                                                                  | A10A                                                                                                                   |                            |
|                                                                       | 9                                              | Dyslipidaemia                                                          | 272.2, 272.4                                                                                                                                                                     | C10                                                                                                                    |                            |
|                                                                       | 10                                             | Obesity                                                                | 278.0x                                                                                                                                                                           |                                                                                                                        |                            |
|                                                                       | 11                                             | Weight loss                                                            | 260-263.x                                                                                                                                                                        |                                                                                                                        |                            |
|                                                                       | 12                                             | Disorders of fluid, electrolyte, and acid-base balance                 | 276.x                                                                                                                                                                            |                                                                                                                        |                            |
|                                                                       | 13                                             | Gout                                                                   | 274.x                                                                                                                                                                            | M04AC01, M04AA, M04AB                                                                                                  |                            |
|                                                                       | 14                                             | Other disorders of endocrine, nutritional and metabolic diseases       | 240.x-242.x, 245.x, 246.x, 249.x, 251.x, 252.8, 252.9, 253.x-259.x, 264.x-269.x, 270.x, 271.x, 272.0, 272.1, 272.3, 272.5-272.9, 273.x, 275.x, 277.x, 278.1-278.8 (except 277.0) |                                                                                                                        |                            |
|                                                                       | 15                                             | Disorders involving the immune mechanisms                              | 279.x                                                                                                                                                                            |                                                                                                                        |                            |
|                                                                       | Diseases of the blood and blood-forming organs | 16                                                                     | Coagulation defects                                                                                                                                                              | 286.x                                                                                                                  | B02B                       |
|                                                                       |                                                | 17                                                                     | Autoimmune haemolytic anaemias, Other anaemias, Anaemias only tracked from drug therapy                                                                                          | 280.x-282.x, 283.1-283.9, 284.x-285.x                                                                                  | B03A, B03B, B03XA01, L03AA |
|                                                                       |                                                | 18                                                                     | Other diseases of the blood and blood-forming organs                                                                                                                             | 287.x-289.x                                                                                                            |                            |
| Mental disorders                                                      | 19                                             | Dementia / Alzheimer                                                   | 290.0-290.4x, 331.0x                                                                                                                                                             | N06DA, N06DX01                                                                                                         |                            |

|                                                 |    |                                                       |                                                                                                                                                                                                                                              |                                                                                                                                       |
|-------------------------------------------------|----|-------------------------------------------------------|----------------------------------------------------------------------------------------------------------------------------------------------------------------------------------------------------------------------------------------------|---------------------------------------------------------------------------------------------------------------------------------------|
|                                                 | 20 | Psychosis                                             | 295.x, 297.x, 298.2-298.9, 299.1x                                                                                                                                                                                                            | N05AD, N05AA, N05AB, N05AC, N05AX, N05AE, N05AF, N05AG, N05AH, N05AL                                                                  |
|                                                 | 21 | Depression                                            | 296.2, 296.3, 296.82, 298.0, 300.4, 301.12, 309.0x, 309.1x, 311.x                                                                                                                                                                            | N06A                                                                                                                                  |
|                                                 | 22 | Bipolar disorders                                     | 296.0x, 296.1x, 296.4x, 296.5x, 296.6x, 296.7x, 296.80, 296.81, 296.89, 296.9x, 298.1x                                                                                                                                                       | N05AN                                                                                                                                 |
|                                                 | 23 | Alcohol abuse                                         | 291.1, 291.2, 291.5, 291.8x, 291.9, 303.9, 305.0x, V11.3x                                                                                                                                                                                    | N07BB01                                                                                                                               |
|                                                 | 24 | Drug addiction                                        | 292.0x, 292.82-292.89, 292.9x, 304.x, 305.2x-305.9x                                                                                                                                                                                          | N07BB04                                                                                                                               |
|                                                 | 25 | Anxiety                                               | 300.0x                                                                                                                                                                                                                                       | N05BA, N05BB01, N05CD, N05BC01, N05BC51, N05BX, N05CF, N05CX01, N06BX                                                                 |
|                                                 | 26 | Other mental disorders                                | 290.8, 290.9, 291.0, 291.3, 291.4, 292.1x, 292.2, 292.81, 293.x, 294.x, 299.0x, 299.8x, 299.9x, 300.0x-300.2x, 300.3, 300.5-300.9, 301.0, 301.10, 301.11, 301.2x-301.9x, 302.x, 303.x, 305.1, 306.x-308.x, 309.2x-309.4x, 310.x, 312.x-319.x |                                                                                                                                       |
| Diseases of the nervous system and sense organs | 27 | Parkinson's disease and parkinsonism                  | 332.x                                                                                                                                                                                                                                        | N04                                                                                                                                   |
|                                                 | 28 | Multiple sclerosis                                    | 340                                                                                                                                                                                                                                          | L03AB07, L03AB08, L04AA23, L04AA27, L03AX13, L04AA31, L04AA34, L03AB13, L04AX07                                                       |
|                                                 | 29 | Epilepsy and recurrent seizures                       | 345.x                                                                                                                                                                                                                                        | N03AF01, N03AB02, N03AA02, N03AA03, N03AA04, N03AE01, N03AD01, N03AG01, N05BA09, N03AG04, N03AX10, N03AG06, N03AF02, N03AX14, N03AX15 |
|                                                 | 30 | Glaucoma                                              | 365.x                                                                                                                                                                                                                                        | S01E                                                                                                                                  |
|                                                 | 31 | Disorders of the eye and adnexa                       | 360.x-379.x (except 365.x)                                                                                                                                                                                                                   |                                                                                                                                       |
|                                                 | 32 | Diseases of the ear and mastoid process               | 380.x-389.x                                                                                                                                                                                                                                  |                                                                                                                                       |
|                                                 | 33 | Other diseases of the nervous system and sense organs | 320.x-326.x, 330.x-331.x, 333.x-337.x, 340.x-344.x, 346.x-359.x                                                                                                                                                                              |                                                                                                                                       |
| Diseases of the circulatory system              | 34 | Ischaemic Heart Disease/Angina                        | 410.x – 414                                                                                                                                                                                                                                  | C01DA, C01DX                                                                                                                          |
|                                                 | 35 | Heart failure                                         | 398.91, 402.11, 402.91, 404.11, 404.13, 404.91, 404.93, 428.x                                                                                                                                                                                |                                                                                                                                       |
|                                                 | 36 | Arrhythmia                                            | 426.10, 426.11, 426.13, 426.20-426.53, 426.60-426.89, 427.0, 427.2,                                                                                                                                                                          | C01BA, C01BC, C01BD                                                                                                                   |

|                                    |    |                                                                                                           |                                                                                                                                                                                                                                                                                                                                                                                                                                                                                                                                             |
|------------------------------------|----|-----------------------------------------------------------------------------------------------------------|---------------------------------------------------------------------------------------------------------------------------------------------------------------------------------------------------------------------------------------------------------------------------------------------------------------------------------------------------------------------------------------------------------------------------------------------------------------------------------------------------------------------------------------------|
|                                    |    | 427.31, 427.60, 427.9, 785.0x, V45.0x, V53.3x                                                             |                                                                                                                                                                                                                                                                                                                                                                                                                                                                                                                                             |
|                                    | 37 | Valvular diseases                                                                                         | 093.20-093.24, 394.0x-397.1x, 424.00-424.91, 746.3x-746.6x, V42.2x, V43.3x                                                                                                                                                                                                                                                                                                                                                                                                                                                                  |
|                                    | 38 | Vascular diseases                                                                                         | 440.x, 441.2, 441.4, 441.7, 441.9, 443.1x-443.9x, 447.1, 557.1x, 557.9x, 785.4x, V43.4x                                                                                                                                                                                                                                                                                                                                                                                                                                                     |
|                                    | 39 | Cerebrovascular diseases                                                                                  | 430.x-438.x                                                                                                                                                                                                                                                                                                                                                                                                                                                                                                                                 |
|                                    | 40 | Hypertension                                                                                              | 401.x-405.x                                                                                                                                                                                                                                                                                                                                                                                                                                                                                                                                 |
|                                    |    |                                                                                                           | C03AA, C03AB, C03AH, C03AX01, C02CA04, C03BA02, C03BA03, C03BA04, C03BA05, C03BA07, C03BA08, C03BA09, C03BA10, C03BA11, C03DB01, C03DB02, C03EA, C09BA02, C09BA03, C09BA04, C09BA05, C09BA06, C09BA07, C09BA08, C09BA09, C09BB, C09DB, C09DA01, C09DA02, C09DA03, C09DA04, C09DA06, C09DA07, C09DA08, C02AB01, C02AB02, C02AC01, C02AC02, C02AC04, C02AC05, C02DB02, C02DB03, C02DB04, C02DC01, C02DD01, C02DG01, C02KA01, C02KB01, C02KC01, C02KD01, C02KX01, C09XA B01AB, B01AX01, B01AD10, B01AD12, C04AD03, B01AC05 B01AA, B01AE, B01AF |
|                                    | 41 | Coronary and peripheral vascular disease                                                                  |                                                                                                                                                                                                                                                                                                                                                                                                                                                                                                                                             |
|                                    | 42 | Oral anticoagulant agents                                                                                 |                                                                                                                                                                                                                                                                                                                                                                                                                                                                                                                                             |
|                                    | 43 | Other diseases of the circulatory system                                                                  | 390.x-392.x, 393, 397.9, 398.90, 398.99, 411.8x, 412.x-417x, 420.x-423.x, 424.99, 425.x, 426.0, 426.12, 426.54, 426.9, 427.1, 427.32, 427.4x, 427.5, 427.61, 427.69, 427.8x, 429.x, 441.0x, 441.1, 441.3, 441.5, 441.6, 442.x, 443.0, 444.x-446.x, 447.0, 447.2-447.9, 448.x 451.x-459.x                                                                                                                                                                                                                                                    |
| Diseases of the respiratory system | 44 | Chronic Obstructive Pulmonary Disease, Asthma, Chronic respiratory disease only tracked from drug therapy | 490-492.x, 493.x, 494.x, 496 R03AA, R03AB, R03AC, R03DA, R03DB, R03DA20, R01AC01, R03BC01, R01AC51, S01GX01, S01GX51, R03BA                                                                                                                                                                                                                                                                                                                                                                                                                 |

|                                                              |    |                                                                                                                                            |                                                                                       |                                                                                                                                                                                             |
|--------------------------------------------------------------|----|--------------------------------------------------------------------------------------------------------------------------------------------|---------------------------------------------------------------------------------------|---------------------------------------------------------------------------------------------------------------------------------------------------------------------------------------------|
|                                                              | 45 | Acute respiratory infections                                                                                                               | 460-466.x                                                                             |                                                                                                                                                                                             |
|                                                              | 46 | Cystic Fibrosis                                                                                                                            | 277.0                                                                                 | R05CB, R05FB01, R05FA01, A09AA02, R07AX02, R07AX30, R07AX31                                                                                                                                 |
|                                                              | 47 | Other diseases of the respiratory system                                                                                                   | 470.x-478.x, 480.x-487.x, 495.x, 500.x-508.x, 510.x-519.x                             |                                                                                                                                                                                             |
| Diseases of the digestive system                             | 48 | Liver cirrhosis and other liver chronic diseases                                                                                           | 571.x, 573.x                                                                          | J05AP08, J05AP09, J05AP51, J05AP53, J05AP54, J05AP55, J05AP56, J05AP57, B05AA01 A07EC01, A07EC02, A07EC03, A07EC04                                                                          |
|                                                              | 49 | Inflammatory bowel diseases (Ulcerative colitis and Chron's disease)                                                                       | 555.x-556.x                                                                           |                                                                                                                                                                                             |
|                                                              | 50 | Chronic and acute pancreatitis                                                                                                             | 577.0-577.1                                                                           |                                                                                                                                                                                             |
|                                                              | 51 | Other diseases of the digestive system                                                                                                     | 520.x-553.x, 557.x-570, 572.x, 574.x-576.x, 577.2-577.9, 578.x, 579.x                 |                                                                                                                                                                                             |
| Diseases of the genitourinary system                         | 52 | Chronic kidney disease                                                                                                                     | 585, V45.1, V56.x, V03AE                                                              |                                                                                                                                                                                             |
|                                                              | 53 | Other kidney disorders                                                                                                                     | 580.x-584.x, 586, 587, 588.x-589.x                                                    |                                                                                                                                                                                             |
|                                                              | 54 | Other diseases of the genitourinary system                                                                                                 | 590.x-608.x, 610.x, 611.x, 614.x-629.x                                                |                                                                                                                                                                                             |
| Diseases of the skin and subcutaneous tissues                | 55 | Diseases of the skin and subcutaneous tissues, including No rheumatoid psoriasis                                                           | 680.x-686.x, 690.x-695.x, 696.0, 696.2-696.5, 696.8, 697.x, 698.x, 700.x-709.x, 696.1 | D05BB01, D05BB02, D05AX                                                                                                                                                                     |
| Diseases of the musculoskeletal system and connective tissue | 56 | Autoimmune disease (Rheumatoid arthritis, Rheumatoid psoriasis, Anchylosing spondylitis, Systemic sclerosis, Systemic lupus erythematosus) | 714.0, 696.0, 720.0, 710.1x, 710.0x                                                   |                                                                                                                                                                                             |
|                                                              | 57 | Other diseases of the musculoskeletal system and connective tissue                                                                         | 710.2-710.9, 711.x-713.x, 714.1x, 714.9x, 715.x-719.x, 720.1x-720.9x, 721.x-739.x     |                                                                                                                                                                                             |
| Symptoms, signs and ill-defined conditions                   | 58 | Symptoms, signs and ill-defined conditions                                                                                                 | 780-799                                                                               |                                                                                                                                                                                             |
| Other conditions                                             | 59 | Transplantation                                                                                                                            | V42                                                                                   | L04AA01, L04AA02, L04AA03, L04AA04, L04AA05, L04AA06, L04AA08, L04AA09, L04AA10, L04AA11, L04AA12, L04AA14, L04AA15, L04AA16, L04AA17, L04AA18, L04AA19, L04AA21, L04AD01, L04AD02, L04AX01 |

1  
2  
3  
4  
5  
6  
7  
8  
9  
10  
11  
12  
13  
14  
15  
16  
17  
18  
19  
20  
21  
22  
23  
24  
25  
26  
27  
28  
29  
30  
31  
32  
33  
34  
35  
36  
37  
38  
39  
40  
41  
42  
43  
44  
45  
46

|    |                 |              |                                                                              |
|----|-----------------|--------------|------------------------------------------------------------------------------|
| 60 | Chronic pain    | 338.2, 338.4 | N02AA01, N02AG01, N02AE01,<br>N02AB03, N02AA05, N02AA55,<br>N02AA03, N02AX06 |
| 61 | Corticosteroids |              | H02                                                                          |

For peer review only

**The RECORD statement – checklist of items, extended from the STROBE statement, that should be reported in observational studies using routinely collected health data.**

|                           | Item No. | STROBE items                                                                                                                                                                               | Location in manuscript where items are reported | RECORD items                                                                                                                                                                                                                                                                                                                                                                                                                                | Location in manuscript where items are reported |
|---------------------------|----------|--------------------------------------------------------------------------------------------------------------------------------------------------------------------------------------------|-------------------------------------------------|---------------------------------------------------------------------------------------------------------------------------------------------------------------------------------------------------------------------------------------------------------------------------------------------------------------------------------------------------------------------------------------------------------------------------------------------|-------------------------------------------------|
| <b>Title and abstract</b> |          |                                                                                                                                                                                            |                                                 |                                                                                                                                                                                                                                                                                                                                                                                                                                             |                                                 |
|                           | 1        | (a) Indicate the study's design with a commonly used term in the title or the abstract (b) Provide in the abstract an informative and balanced summary of what was done and what was found |                                                 | RECORD 1.1: The type of data used should be specified in the title or abstract. When possible, the name of the databases used should be included.<br><br>RECORD 1.2: If applicable, the geographic region and timeframe within which the study took place should be reported in the title or abstract.<br><br>RECORD 1.3: If linkage between databases was conducted for the study, this should be clearly stated in the title or abstract. | Page 1-5                                        |
| <b>Introduction</b>       |          |                                                                                                                                                                                            |                                                 |                                                                                                                                                                                                                                                                                                                                                                                                                                             |                                                 |
| Background rationale      | 2        | Explain the scientific background and rationale for the investigation being reported                                                                                                       |                                                 |                                                                                                                                                                                                                                                                                                                                                                                                                                             | 7                                               |
| Objectives                | 3        | State specific objectives, including any prespecified hypotheses                                                                                                                           |                                                 |                                                                                                                                                                                                                                                                                                                                                                                                                                             | 8                                               |
| <b>Methods</b>            |          |                                                                                                                                                                                            |                                                 |                                                                                                                                                                                                                                                                                                                                                                                                                                             |                                                 |
| Study Design              | 4        | Present key elements of study design early in the paper                                                                                                                                    |                                                 |                                                                                                                                                                                                                                                                                                                                                                                                                                             | 9-11                                            |
| Setting                   | 5        | Describe the setting, locations, and relevant dates, including periods of recruitment, exposure, follow-up, and data collection                                                            |                                                 |                                                                                                                                                                                                                                                                                                                                                                                                                                             | 8                                               |

|                              |   |                                                                                                                                                                                                                                                                                                                                                                                                                                                                                                                                                                                                                                                                                                                              |  |                                                                                                                                                                                                                                                                                                                                                                                                                                                                                                                                                                                                                                                                                                      |      |
|------------------------------|---|------------------------------------------------------------------------------------------------------------------------------------------------------------------------------------------------------------------------------------------------------------------------------------------------------------------------------------------------------------------------------------------------------------------------------------------------------------------------------------------------------------------------------------------------------------------------------------------------------------------------------------------------------------------------------------------------------------------------------|--|------------------------------------------------------------------------------------------------------------------------------------------------------------------------------------------------------------------------------------------------------------------------------------------------------------------------------------------------------------------------------------------------------------------------------------------------------------------------------------------------------------------------------------------------------------------------------------------------------------------------------------------------------------------------------------------------------|------|
| Participants                 | 6 | <p>(a) <i>Cohort study</i> - Give the eligibility criteria, and the sources and methods of selection of participants. Describe methods of follow-up</p> <p><i>Case-control study</i> - Give the eligibility criteria, and the sources and methods of case ascertainment and control selection. Give the rationale for the choice of cases and controls</p> <p><i>Cross-sectional study</i> - Give the eligibility criteria, and the sources and methods of selection of participants</p> <p>(b) <i>Cohort study</i> - For matched studies, give matching criteria and number of exposed and unexposed</p> <p><i>Case-control study</i> - For matched studies, give matching criteria and the number of controls per case</p> |  | <p>RECORD 6.1: The methods of study population selection (such as codes or algorithms used to identify subjects) should be listed in detail. If this is not possible, an explanation should be provided.</p> <p>RECORD 6.2: Any validation studies of the codes or algorithms used to select the population should be referenced. If validation was conducted for this study and not published elsewhere, detailed methods and results should be provided.</p> <p>RECORD 6.3: If the study involved linkage of databases, consider use of a flow diagram or other graphical display to demonstrate the data linkage process, including the number of individuals with linked data at each stage.</p> | 8-11 |
| Variables                    | 7 | Clearly define all outcomes, exposures, predictors, potential confounders, and effect modifiers. Give diagnostic criteria, if applicable.                                                                                                                                                                                                                                                                                                                                                                                                                                                                                                                                                                                    |  | RECORD 7.1: A complete list of codes and algorithms used to classify exposures, outcomes, confounders, and effect modifiers should be provided. If these cannot be reported, an explanation should be provided.                                                                                                                                                                                                                                                                                                                                                                                                                                                                                      | 9    |
| Data sources/<br>measurement | 8 | For each variable of interest, give sources of data and details of methods of assessment (measurement). Describe comparability of assessment methods if there is more than one group                                                                                                                                                                                                                                                                                                                                                                                                                                                                                                                                         |  |                                                                                                                                                                                                                                                                                                                                                                                                                                                                                                                                                                                                                                                                                                      | 9    |

|                                                                                                                                                    |                                  |    |                                                                                                                                                                                                                                                                                                                                                                                                                                                                                                                                                                      |                                                                                                                                                       |      |
|----------------------------------------------------------------------------------------------------------------------------------------------------|----------------------------------|----|----------------------------------------------------------------------------------------------------------------------------------------------------------------------------------------------------------------------------------------------------------------------------------------------------------------------------------------------------------------------------------------------------------------------------------------------------------------------------------------------------------------------------------------------------------------------|-------------------------------------------------------------------------------------------------------------------------------------------------------|------|
| 1<br>2<br>3<br>4                                                                                                                                   | Bias                             | 9  | Describe any efforts to address potential sources of bias                                                                                                                                                                                                                                                                                                                                                                                                                                                                                                            |                                                                                                                                                       | 9-11 |
| 5<br>6<br>7<br>8<br>9                                                                                                                              | Study size                       | 10 | Explain how the study size was arrived at                                                                                                                                                                                                                                                                                                                                                                                                                                                                                                                            |                                                                                                                                                       | 8-11 |
| 10<br>11<br>12<br>13<br>14<br>15<br>16<br>17<br>18<br>19<br>20<br>21<br>22<br>23<br>24<br>25<br>26<br>27<br>28<br>29<br>30<br>31<br>32<br>33<br>34 | Quantitative variables           | 11 | Explain how quantitative variables were handled in the analyses. If applicable, describe which groupings were chosen, and why                                                                                                                                                                                                                                                                                                                                                                                                                                        |                                                                                                                                                       | 9,10 |
| 35<br>36<br>37<br>38<br>39<br>40<br>41<br>42<br>43<br>44<br>45<br>46<br>47                                                                         | Statistical methods              | 12 | (a) Describe all statistical methods, including those used to control for confounding<br>(b) Describe any methods used to examine subgroups and interactions<br>(c) Explain how missing data were addressed<br>(d) <i>Cohort study</i> - If applicable, explain how loss to follow-up was addressed<br><i>Case-control study</i> - If applicable, explain how matching of cases and controls was addressed<br><i>Cross-sectional study</i> - If applicable, describe analytical methods taking account of sampling strategy<br>(e) Describe any sensitivity analyses |                                                                                                                                                       | 9-11 |
|                                                                                                                                                    | Data access and cleaning methods |    | ..                                                                                                                                                                                                                                                                                                                                                                                                                                                                                                                                                                   | RECORD 12.1: Authors should describe the extent to which the investigators had access to the database population used to create the study population. | 8-11 |



|                  |    |                                                                                                                                                                                                                                                                                                                                                 |  |                                                                                                                                                                                                                                                                                                                    |       |
|------------------|----|-------------------------------------------------------------------------------------------------------------------------------------------------------------------------------------------------------------------------------------------------------------------------------------------------------------------------------------------------|--|--------------------------------------------------------------------------------------------------------------------------------------------------------------------------------------------------------------------------------------------------------------------------------------------------------------------|-------|
|                  |    |                                                                                                                                                                                                                                                                                                                                                 |  | RECORD 12.2: Authors should provide information on the data cleaning methods used in the study.                                                                                                                                                                                                                    |       |
| Linkage          |    | ..                                                                                                                                                                                                                                                                                                                                              |  | RECORD 12.3: State whether the study included person-level, institutional-level, or other data linkage across two or more databases. The methods of linkage and methods of linkage quality evaluation should be provided.                                                                                          | 8,9   |
| <b>Results</b>   |    |                                                                                                                                                                                                                                                                                                                                                 |  |                                                                                                                                                                                                                                                                                                                    |       |
| Participants     | 13 | (a) Report the numbers of individuals at each stage of the study ( <i>e.g.</i> , numbers potentially eligible, examined for eligibility, confirmed eligible, included in the study, completing follow-up, and analysed)<br>(b) Give reasons for non-participation at each stage.<br>(c) Consider use of a flow diagram                          |  | RECORD 13.1: Describe in detail the selection of the persons included in the study ( <i>i.e.</i> , study population selection) including filtering based on data quality, data availability and linkage. The selection of included persons can be described in the text and/or by means of the study flow diagram. | 11,12 |
| Descriptive data | 14 | (a) Give characteristics of study participants ( <i>e.g.</i> , demographic, clinical, social) and information on exposures and potential confounders<br>(b) Indicate the number of participants with missing data for each variable of interest<br>(c) <i>Cohort study</i> - summarise follow-up time ( <i>e.g.</i> , average and total amount) |  |                                                                                                                                                                                                                                                                                                                    | 11,12 |
| Outcome data     | 15 | <i>Cohort study</i> - Report numbers of outcome events or summary measures over time<br><i>Case-control study</i> - Report numbers in each exposure                                                                                                                                                                                             |  |                                                                                                                                                                                                                                                                                                                    | 11,12 |

|                   |    |                                                                                                                                                                                                                                                                                                                                                                                                                 |  |                                                                                                                                                                                                                                                                                                          |       |
|-------------------|----|-----------------------------------------------------------------------------------------------------------------------------------------------------------------------------------------------------------------------------------------------------------------------------------------------------------------------------------------------------------------------------------------------------------------|--|----------------------------------------------------------------------------------------------------------------------------------------------------------------------------------------------------------------------------------------------------------------------------------------------------------|-------|
|                   |    | category, or summary measures of exposure<br><i>Cross-sectional study</i> - Report numbers of outcome events or summary measures                                                                                                                                                                                                                                                                                |  |                                                                                                                                                                                                                                                                                                          |       |
| Main results      | 16 | (a) Give unadjusted estimates and, if applicable, confounder-adjusted estimates and their precision (e.g., 95% confidence interval). Make clear which confounders were adjusted for and why they were included<br>(b) Report category boundaries when continuous variables were categorized<br>(c) If relevant, consider translating estimates of relative risk into absolute risk for a meaningful time period |  |                                                                                                                                                                                                                                                                                                          | 11,12 |
| Other analyses    | 17 | Report other analyses done— e.g., analyses of subgroups and interactions, and sensitivity analyses                                                                                                                                                                                                                                                                                                              |  |                                                                                                                                                                                                                                                                                                          | 11,12 |
| <b>Discussion</b> |    |                                                                                                                                                                                                                                                                                                                                                                                                                 |  |                                                                                                                                                                                                                                                                                                          |       |
| Key results       | 18 | Summarise key results with reference to study objectives                                                                                                                                                                                                                                                                                                                                                        |  |                                                                                                                                                                                                                                                                                                          | 12,13 |
| Limitations       | 19 | Discuss limitations of the study, taking into account sources of potential bias or imprecision. Discuss both direction and magnitude of any potential bias                                                                                                                                                                                                                                                      |  | RECORD 19.1: Discuss the implications of using data that were not created or collected to answer the specific research question(s). Include discussion of misclassification bias, unmeasured confounding, missing data, and changing eligibility over time, as they pertain to the study being reported. | 15,16 |
| Interpretation    | 20 | Give a cautious overall interpretation of results considering objectives,                                                                                                                                                                                                                                                                                                                                       |  |                                                                                                                                                                                                                                                                                                          | 13-15 |

|                                                           |    |                                                                                                                                                               |  |                                                                                                                                                          |    |
|-----------------------------------------------------------|----|---------------------------------------------------------------------------------------------------------------------------------------------------------------|--|----------------------------------------------------------------------------------------------------------------------------------------------------------|----|
|                                                           |    | limitations, multiplicity of analyses, results from similar studies, and other relevant evidence                                                              |  |                                                                                                                                                          |    |
| Generalisability                                          | 21 | Discuss the generalisability (external validity) of the study results                                                                                         |  |                                                                                                                                                          | 15 |
| <b>Other Information</b>                                  |    |                                                                                                                                                               |  |                                                                                                                                                          |    |
| Funding                                                   | 22 | Give the source of funding and the role of the funders for the present study and, if applicable, for the original study on which the present article is based |  |                                                                                                                                                          | 17 |
| Accessibility of protocol, raw data, and programming code |    | ..                                                                                                                                                            |  | RECORD 22.1: Authors should provide information on how to access any supplemental information such as the study protocol, raw data, or programming code. | 18 |

\*Reference: Benchimol EI, Smeeth L, Guttman A, Harron K, Moher D, Petersen I, Sørensen HT, von Elm E, Langan SM, the RECORD Working Committee. The REporting of studies Conducted using Observational Routinely-collected health Data (RECORD) Statement. *PLoS Medicine* 2015; in press.

\*Checklist is protected under Creative Commons Attribution ([CC BY](https://creativecommons.org/licenses/by/4.0/)) license.
