# Supplementary material for: Stratification of the risk of developing severe or lethal Covid-19 using a new score from a large Italian population: a population-based cohort study
Source: PubMed Central journal article supplement — BMJ Open. 2021 Nov 18;11(11):e053281. doi: 10.1136/bmjopen-2021-053281 (PMC8602929; doi:10.1136/bmjopen-2021-053281), 2021-11-18
Supplement: bmjopen-2021-053281supp001.pdf [file bmjopen-2021-053281supp001.pdf]

## Addressing vaccination priority by stratifying general population according with frailty: a large population-based cohort study

Giovanni Corrao, PhD<sup>1,2</sup>, Federico Rea, PhD<sup>1,2</sup>, Flavia Carle, PhD<sup>1,3</sup>, Salvatore Scondotto, PhD<sup>1,4</sup>, Alessandra Allotta, MSc<sup>4</sup>, Vito Lepore, MD<sup>5</sup>, Antonio D’Ettore, MSc<sup>5</sup>, Cinzia Tanzarella, MSc<sup>5</sup>, Patrizia Vittori, MSc<sup>6</sup>, Sabrina Abena, MSc<sup>6</sup>, Marica Iommi, PhD<sup>3</sup>, Liana Spazzafumo, MSc<sup>1,7</sup>, Michele Ercolanoni, MSc<sup>8,9</sup>, Roberto Blaco, MSc<sup>9</sup>, Simona Carbone, MSc<sup>10</sup>, Cristina Giordani, MSc<sup>10</sup>, Dario Manfellotto, MD<sup>11</sup>, Massimo Galli, MD<sup>12,13</sup>, Giuseppe Mancina, MD<sup>14,15</sup> on behalf of the “Monitoring and Assessing care Pathways (MAP)” working group of the Italian Ministry of Health

<sup>1</sup> National Centre for Healthcare Research and Pharmacoepidemiology, University of Milano-Bicocca, Milan, Italy

<sup>2</sup> Unit of Biostatistics, Epidemiology and Public Health, Department of Statistics and Quantitative Methods, University of Milano-Bicocca, Milan, Italy

<sup>3</sup> Center of Epidemiology and Biostatistics, Polytechnic University of Marche, Ancona, Italy

<sup>4</sup> Department of Health Services and Epidemiological Observatory, Regional Health Authority, Sicily Region, Palermo, Italy

<sup>5</sup> Regional Health Agency of Puglia (Agenzia regionale socio-sanitaria), Bari, Italy

<sup>6</sup> Regional Unit of Epidemiology and Social Policies, Regional Health Authority, Valle D’Aosta Region, Aosta, Italy

<sup>7</sup> Regional Health Agency of Marche, Ancona, Italy

<sup>8</sup> ARIA S.p.a., Milan, Italy

<sup>9</sup> Epidemiologic Observatory, Regional Welfare Service, Lombardy Region, Milan, Italy

<sup>10</sup> Department of Health Planning, Italian Health Ministry, Rome, Italy

<sup>11</sup> Department of Internal Medicine, Hospital Fatebenefratelli - AFaR, Isola Tiberina, Rome, Italy

<sup>12</sup> Infectious Diseases Unit, Luigi Sacco Hospital, Milan, Italy

<sup>13</sup> Department of Biomedical and Clinical Sciences, University of Milan, Milan, Italy

<sup>14</sup> Emeritus Professor, University of Milano-Bicocca, Milan, Italy

<sup>15</sup> Policlinico di Monza, Monza, Italy

## SUPPLEMENTARY MATERIAL

**Supplementary Table S1.** Selected features of regional populations included into the validation study in comparison with entire Italian population

| Region        | Location       | Italian 2020 population census <sup>†</sup> |                 | Indicators of Covid-19 Epidemic Spread<br>(March-December 2020) <sup>‡</sup> |        |
|---------------|----------------|---------------------------------------------|-----------------|------------------------------------------------------------------------------|--------|
|               |                | Whole population                            | Population aged | Ascertained cases                                                            | Deaths |
|               |                |                                             | 18 – 79 years   |                                                                              |        |
| Lombardy      | Norther Italy  | 10,027,602                                  | 7,663,864       | 478,903                                                                      | 25,123 |
| Valle d'Aoste | North Italy    | 125,034                                     | 95,914          | 7,273                                                                        | 379    |
| Marche        | Central Italy  | 1,512,672                                   | 1,150,809       | 41,624                                                                       | 1,571  |
| Puglia        | Southern Italy | 3,953,305                                   | 3,055,720       | 90,964                                                                       | 2,472  |
| Sicily        | Island         | 4,875,290                                   | 3,744,848       | 93,644                                                                       | 2,412  |
|               | Total          | 20,493,903                                  | 15,711,155      | 712,408                                                                      | 31,957 |
|               | Italy          | 59,641,488                                  | 45,788,626      | 2,107,166                                                                    | 74,159 |

<sup>†</sup> source: <http://demo.istat.it/popres/index.php?anno=2020&lingua=ita>

<sup>‡</sup> source: Protezione Civile. Dati COVID-19 Italia (available at <https://github.com/pcm-dpc/COVID-19>)

**Supplementary Table S2.** List of candidate conditions for predicting the risk of experiencing severe fatal forms of COVID-19 infection

| Diagnostic categories                                                 | #  | Disease / condition                                                                     | ICD-9 CM                                                                                                                                                                         | ATC                                                                                                                    |
|-----------------------------------------------------------------------|----|-----------------------------------------------------------------------------------------|----------------------------------------------------------------------------------------------------------------------------------------------------------------------------------|------------------------------------------------------------------------------------------------------------------------|
| Infectious and parasitic diseases                                     | 1  | HIV infection                                                                           | 042.x, V08                                                                                                                                                                       | J05AB14, J05AE, J05AF01, J05AF02, J05AF04, J05AF05, J05AF06, J05AF09, J05AG, J05AR, J05AX07, J05AX08, J05AX09, J05AX12 |
|                                                                       | 2  | Tuberculosis and Other infectious and parasitic diseases                                | 010.x - 018.x, 001.x-009.x, 020.x-027.x, 030.x-041.x, 045.x-057.x, 060.x-066.x, 070.x-088.x, 090.x-104.x, 110.x-118.x, 120.x-139.x                                               | J04AB                                                                                                                  |
| Neoplasms                                                             | 3  | Solid malignancies and Neoplasm of lymphatic and haematopoietic tissue                  | 140.x-165.x, 170.x-176.x, 179.x-199.x, V58.0, 92.2, 200.x-208-x                                                                                                                  | L01, L03AC, L02BA01, L02BA02, L02BG02, L02BG03, L02BG04, L02BG06, L02BB01, L02BB03, L02AE02, L02AE04, L02AB01          |
|                                                                       | 4  | Benign neoplasm and carcinoma in situ                                                   | 210.x-234.x                                                                                                                                                                      |                                                                                                                        |
| Endocrine, nutritional and metabolic diseases, and immunity disorders | 5  | Hypothyroidism                                                                          | 243, 244.x                                                                                                                                                                       | H03A, H03B                                                                                                             |
|                                                                       | 6  | Hyper e hypoparathyroidism                                                              | 252.0, 252.1                                                                                                                                                                     |                                                                                                                        |
|                                                                       | 7  | Diabetes without insulin therapy                                                        | 250.x, 348.0x, 357.2, 362.0, 366.41                                                                                                                                              | A10B                                                                                                                   |
|                                                                       | 8  | Insulin therapy                                                                         |                                                                                                                                                                                  | A10A                                                                                                                   |
|                                                                       | 9  | Dyslipidaemia                                                                           | 272.2, 272.4                                                                                                                                                                     | C10                                                                                                                    |
|                                                                       | 10 | Obesity                                                                                 | 278.0x                                                                                                                                                                           |                                                                                                                        |
|                                                                       | 11 | Weight loss                                                                             | 260-263.x                                                                                                                                                                        |                                                                                                                        |
|                                                                       | 12 | Disorders of fluid, electrolyte, and acid-base balance                                  | 276.x                                                                                                                                                                            |                                                                                                                        |
|                                                                       | 13 | Gout                                                                                    | 274.x                                                                                                                                                                            | M04AC01, M04AA, M04AB                                                                                                  |
|                                                                       | 14 | Other disorders of endocrine, nutritional and metabolic diseases                        | 240.x-242.x, 245.x, 246.x, 249.x, 251.x, 252.8, 252.9, 253.x-259.x, 264.x-269.x, 270.x, 271.x, 272.0, 272.1, 272.3, 272.5-272.9, 273.x, 275.x, 277.x, 278.1-278.8 (except 277.0) |                                                                                                                        |
| Diseases of the blood and blood-forming organs                        | 15 | Disorders involving the immune mechanisms                                               | 279.x                                                                                                                                                                            |                                                                                                                        |
|                                                                       | 16 | Coagulation defects                                                                     | 286.x                                                                                                                                                                            | B02B                                                                                                                   |
|                                                                       | 17 | Autoimmune haemolytic anaemias, Other anaemias, Anaemias only tracked from drug therapy | 280.x-282.x, 283.1-283.9, 284.x-285.x                                                                                                                                            | B03A, B03B, B03XA01, L03AA                                                                                             |
|                                                                       | 18 | Other diseases of the blood and blood-forming organs                                    | 287.x-289.x                                                                                                                                                                      |                                                                                                                        |
| Mental disorders                                                      | 19 | Dementia / Alzheimer                                                                    | 290.0-290.4x, 331.0x                                                                                                                                                             | N06DA, N06DX01                                                                                                         |

|                                                 |    |                                                       |                                                                                                                                                                                                                                              |                                                                                                                                       |
|-------------------------------------------------|----|-------------------------------------------------------|----------------------------------------------------------------------------------------------------------------------------------------------------------------------------------------------------------------------------------------------|---------------------------------------------------------------------------------------------------------------------------------------|
|                                                 | 20 | Psychosis                                             | 295.x, 297.x, 298.2-298.9, 299.1x                                                                                                                                                                                                            | N05AD, N05AA, N05AB, N05AC, N05AX, N05AE, N05AF, N05AG, N05AH, N05AL                                                                  |
|                                                 | 21 | Depression                                            | 296.2, 296.3, 296.82, 298.0, 300.4, 301.12, 309.0x, 309.1x, 311.x                                                                                                                                                                            | N06A                                                                                                                                  |
|                                                 | 22 | Bipolar disorders                                     | 296.0x, 296.1x, 296.4x, 296.5x, 296.6x, 296.7x, 296.80, 296.81, 296.89, 296.9x, 298.1x                                                                                                                                                       | N05AN                                                                                                                                 |
|                                                 | 23 | Alcohol abuse                                         | 291.1, 291.2, 291.5, 291.8x, 291.9, 303.9, 305.0x, V11.3x                                                                                                                                                                                    | N07BB01                                                                                                                               |
|                                                 | 24 | Drug addiction                                        | 292.0x, 292.82-292.89, 292.9x, 304.x, 305.2x-305.9x                                                                                                                                                                                          | N07BB04                                                                                                                               |
|                                                 | 25 | Anxiety                                               | 300.0x                                                                                                                                                                                                                                       | N05BA, N05BB01, N05CD, N05BC01, N05BC51, N05BX, N05CF, N05CX01, N06BX                                                                 |
|                                                 | 26 | Other mental disorders                                | 290.8, 290.9, 291.0, 291.3, 291.4, 292.1x, 292.2, 292.81, 293.x, 294.x, 299.0x, 299.8x, 299.9x, 300.0x-300.2x, 300.3, 300.5-300.9, 301.0, 301.10, 301.11, 301.2x-301.9x, 302.x, 303.x, 305.1, 306.x-308.x, 309.2x-309.4x, 310.x, 312.x-319.x |                                                                                                                                       |
| Diseases of the nervous system and sense organs | 27 | Parkinson's disease and parkinsonism                  | 332.x                                                                                                                                                                                                                                        | N04                                                                                                                                   |
|                                                 | 28 | Multiple sclerosis                                    | 340                                                                                                                                                                                                                                          | L03AB07, L03AB08, L04AA23, L04AA27, L03AX13, L04AA31, L04AA34, L03AB13, L04AX07                                                       |
|                                                 | 29 | Epilepsy and recurrent seizures                       | 345.x                                                                                                                                                                                                                                        | N03AF01, N03AB02, N03AA02, N03AA03, N03AA04, N03AE01, N03AD01, N03AG01, N05BA09, N03AG04, N03AX10, N03AG06, N03AF02, N03AX14, N03AX15 |
|                                                 | 30 | Glaucoma                                              | 365.x                                                                                                                                                                                                                                        | S01E                                                                                                                                  |
|                                                 | 31 | Disorders of the eye and adnexa                       | 360.x-379.x (except 365.x)                                                                                                                                                                                                                   |                                                                                                                                       |
|                                                 | 32 | Diseases of the ear and mastoid process               | 380.x-389.x                                                                                                                                                                                                                                  |                                                                                                                                       |
|                                                 | 33 | Other diseases of the nervous system and sense organs | 320.x-326.x, 330.x-331.x, 333.x-337.x, 340.x-344.x, 346.x-359.x                                                                                                                                                                              |                                                                                                                                       |
| Diseases of the circulatory system              | 34 | Ischaemic Heart Disease/Angina                        | 410.x – 414                                                                                                                                                                                                                                  | C01DA, C01DX                                                                                                                          |
|                                                 | 35 | Heart failure                                         | 398.91, 402.11, 402.91, 404.11, 404.13, 404.91, 404.93, 428.x                                                                                                                                                                                |                                                                                                                                       |
|                                                 | 36 | Arrhythmia                                            | 426.10, 426.11, 426.13, 426.20-426.53, 426.60-426.89, 427.0, 427.2,                                                                                                                                                                          | C01BA, C01BC, C01BD                                                                                                                   |

|                                    |    |                                                                                                           |                                                                                                                                                                                                                                                                                                                                                                                                                                                                                                                                             |
|------------------------------------|----|-----------------------------------------------------------------------------------------------------------|---------------------------------------------------------------------------------------------------------------------------------------------------------------------------------------------------------------------------------------------------------------------------------------------------------------------------------------------------------------------------------------------------------------------------------------------------------------------------------------------------------------------------------------------|
|                                    |    | 427.31, 427.60, 427.9, 785.0x, V45.0x, V53.3x                                                             |                                                                                                                                                                                                                                                                                                                                                                                                                                                                                                                                             |
|                                    | 37 | Valvular diseases                                                                                         | 093.20-093.24, 394.0x-397.1x, 424.00-424.91, 746.3x-746.6x, V42.2x, V43.3x                                                                                                                                                                                                                                                                                                                                                                                                                                                                  |
|                                    | 38 | Vascular diseases                                                                                         | 440.x, 441.2, 441.4, 441.7, 441.9, 443.1x-443.9x, 447.1, 557.1x, 557.9x, 785.4x, V43.4x                                                                                                                                                                                                                                                                                                                                                                                                                                                     |
|                                    | 39 | Cerebrovascular diseases                                                                                  | 430.x-438.x                                                                                                                                                                                                                                                                                                                                                                                                                                                                                                                                 |
|                                    | 40 | Hypertension                                                                                              | 401.x-405.x                                                                                                                                                                                                                                                                                                                                                                                                                                                                                                                                 |
|                                    |    |                                                                                                           | C03AA, C03AB, C03AH, C03AX01, C02CA04, C03BA02, C03BA03, C03BA04, C03BA05, C03BA07, C03BA08, C03BA09, C03BA10, C03BA11, C03DB01, C03DB02, C03EA, C09BA02, C09BA03, C09BA04, C09BA05, C09BA06, C09BA07, C09BA08, C09BA09, C09BB, C09DB, C09DA01, C09DA02, C09DA03, C09DA04, C09DA06, C09DA07, C09DA08, C02AB01, C02AB02, C02AC01, C02AC02, C02AC04, C02AC05, C02DB02, C02DB03, C02DB04, C02DC01, C02DD01, C02DG01, C02KA01, C02KB01, C02KC01, C02KD01, C02KX01, C09XA B01AB, B01AX01, B01AD10, B01AD12, C04AD03, B01AC05 B01AA, B01AE, B01AF |
|                                    | 41 | Coronary and peripheral vascular disease                                                                  |                                                                                                                                                                                                                                                                                                                                                                                                                                                                                                                                             |
|                                    | 42 | Oral anticoagulant agents                                                                                 |                                                                                                                                                                                                                                                                                                                                                                                                                                                                                                                                             |
|                                    | 43 | Other diseases of the circulatory system                                                                  | 390.x-392.x, 393, 397.9, 398.90, 398.99, 411.8x, 412.x-417x, 420.x-423.x, 424.99, 425.x, 426.0, 426.12, 426.54, 426.9, 427.1, 427.32, 427.4x, 427.5, 427.61, 427.69, 427.8x, 429.x, 441.0x, 441.1, 441.3, 441.5, 441.6, 442.x, 443.0, 444.x-446.x, 447.0, 447.2-447.9, 448.x 451.x-459.x                                                                                                                                                                                                                                                    |
| Diseases of the respiratory system | 44 | Chronic Obstructive Pulmonary Disease, Asthma, Chronic respiratory disease only tracked from drug therapy | 490-492.x, 493.x, 494.x, 496 R03AA, R03AB, R03AC, R03DA, R03DB, R03DA20, R01AC01, R03BC01, R01AC51, S01GX01, S01GX51, R03BA                                                                                                                                                                                                                                                                                                                                                                                                                 |

|                                                              |    |                                                                                                                                            |                                                                                       |                                                                                                                                                                                             |
|--------------------------------------------------------------|----|--------------------------------------------------------------------------------------------------------------------------------------------|---------------------------------------------------------------------------------------|---------------------------------------------------------------------------------------------------------------------------------------------------------------------------------------------|
|                                                              | 45 | Acute respiratory infections                                                                                                               | 460-466.x                                                                             |                                                                                                                                                                                             |
|                                                              | 46 | Cystic Fibrosis                                                                                                                            | 277.0                                                                                 | R05CB, R05FB01, R05FA01, A09AA02, R07AX02, R07AX30, R07AX31                                                                                                                                 |
|                                                              | 47 | Other diseases of the respiratory system                                                                                                   | 470.x-478.x, 480.x-487.x, 495.x, 500.x-508.x, 510.x-519.x                             |                                                                                                                                                                                             |
| Diseases of the digestive system                             | 48 | Liver cirrhosis and other liver chronic diseases                                                                                           | 571.x, 573.x                                                                          | J05AP08, J05AP09, J05AP51, J05AP53, J05AP54, J05AP55, J05AP56, J05AP57, B05AA01                                                                                                             |
|                                                              | 49 | Inflammatory bowel diseases (Ulcerative colitis and Chron's disease)                                                                       | 555.x-556.x                                                                           | A07EC01, A07EC02, A07EC03, A07EC04                                                                                                                                                          |
|                                                              | 50 | Chronic and acute pancreatitis                                                                                                             | 577.0-577.1                                                                           |                                                                                                                                                                                             |
|                                                              | 51 | Other diseases of the digestive system                                                                                                     | 520.x-553.x, 557.x-570, 572.x, 574.x-576.x, 577.2-577.9, 578.x, 579.x                 |                                                                                                                                                                                             |
| Diseases of the genitourinary system                         | 52 | Chronic kidney disease                                                                                                                     | 585, V45.1, V56.x, V03AE                                                              |                                                                                                                                                                                             |
|                                                              | 53 | Other kidney disorders                                                                                                                     | 580.x-584.x, 586, 587, 588.x-589.x                                                    |                                                                                                                                                                                             |
|                                                              | 54 | Other diseases of the genitourinary system                                                                                                 | 590.x-608.x, 610.x, 611.x, 614.x-629.x                                                |                                                                                                                                                                                             |
| Diseases of the skin and subcutaneous tissues                | 55 | Diseases of the skin and subcutaneous tissues, including No rheumatoid psoriasis                                                           | 680.x-686.x, 690.x-695.x, 696.0, 696.2-696.5, 696.8, 697.x, 698.x, 700.x-709.x, 696.1 | D05BB01, D05BB02, D05AX                                                                                                                                                                     |
| Diseases of the musculoskeletal system and connective tissue | 56 | Autoimmune disease (Rheumatoid arthritis, Rheumatoid psoriasis, Anchylosing spondylitis, Systemic sclerosis, Systemic lupus erythematosus) | 714.0, 696.0, 720.0, 710.1x, 710.0x                                                   |                                                                                                                                                                                             |
|                                                              | 57 | Other diseases of the musculoskeletal system and connective tissue                                                                         | 710.2-710.9, 711.x-713.x, 714.1x, 714.9x, 715.x-719.x, 720.1x-720.9x, 721.x-739.x     |                                                                                                                                                                                             |
| Symptoms, signs and ill-defined conditions                   | 58 | Symptoms, signs and ill-defined conditions                                                                                                 | 780-799                                                                               |                                                                                                                                                                                             |
| Other conditions                                             | 59 | Transplantation                                                                                                                            | V42                                                                                   | L04AA01, L04AA02, L04AA03, L04AA04, L04AA05, L04AA06, L04AA08, L04AA09, L04AA10, L04AA11, L04AA12, L04AA14, L04AA15, L04AA16, L04AA17, L04AA18, L04AA19, L04AA21, L04AD01, L04AD02, L04AX01 |

|    |                 |              |                                                                              |
|----|-----------------|--------------|------------------------------------------------------------------------------|
| 60 | Chronic pain    | 338.2, 338.4 | N02AA01, N02AG01, N02AE01,<br>N02AB03, N02AA05, N02AA55,<br>N02AA03, N02AX06 |
| 61 | Corticosteroids |              | H02                                                                          |
